# Supplementary material for: Tryptophan scanning mutagenesis as a way to mimic the compound-bound state and probe the selectivity of allosteric inhibitors in cells
Source: PubMed Central journal article supplement — Chem Sci. 2020 Jan 10;11(7):1892–904. doi: 10.1039/c9sc04284a (PMC8148087; doi:10.1039/c9sc04284a), 2020-01-10

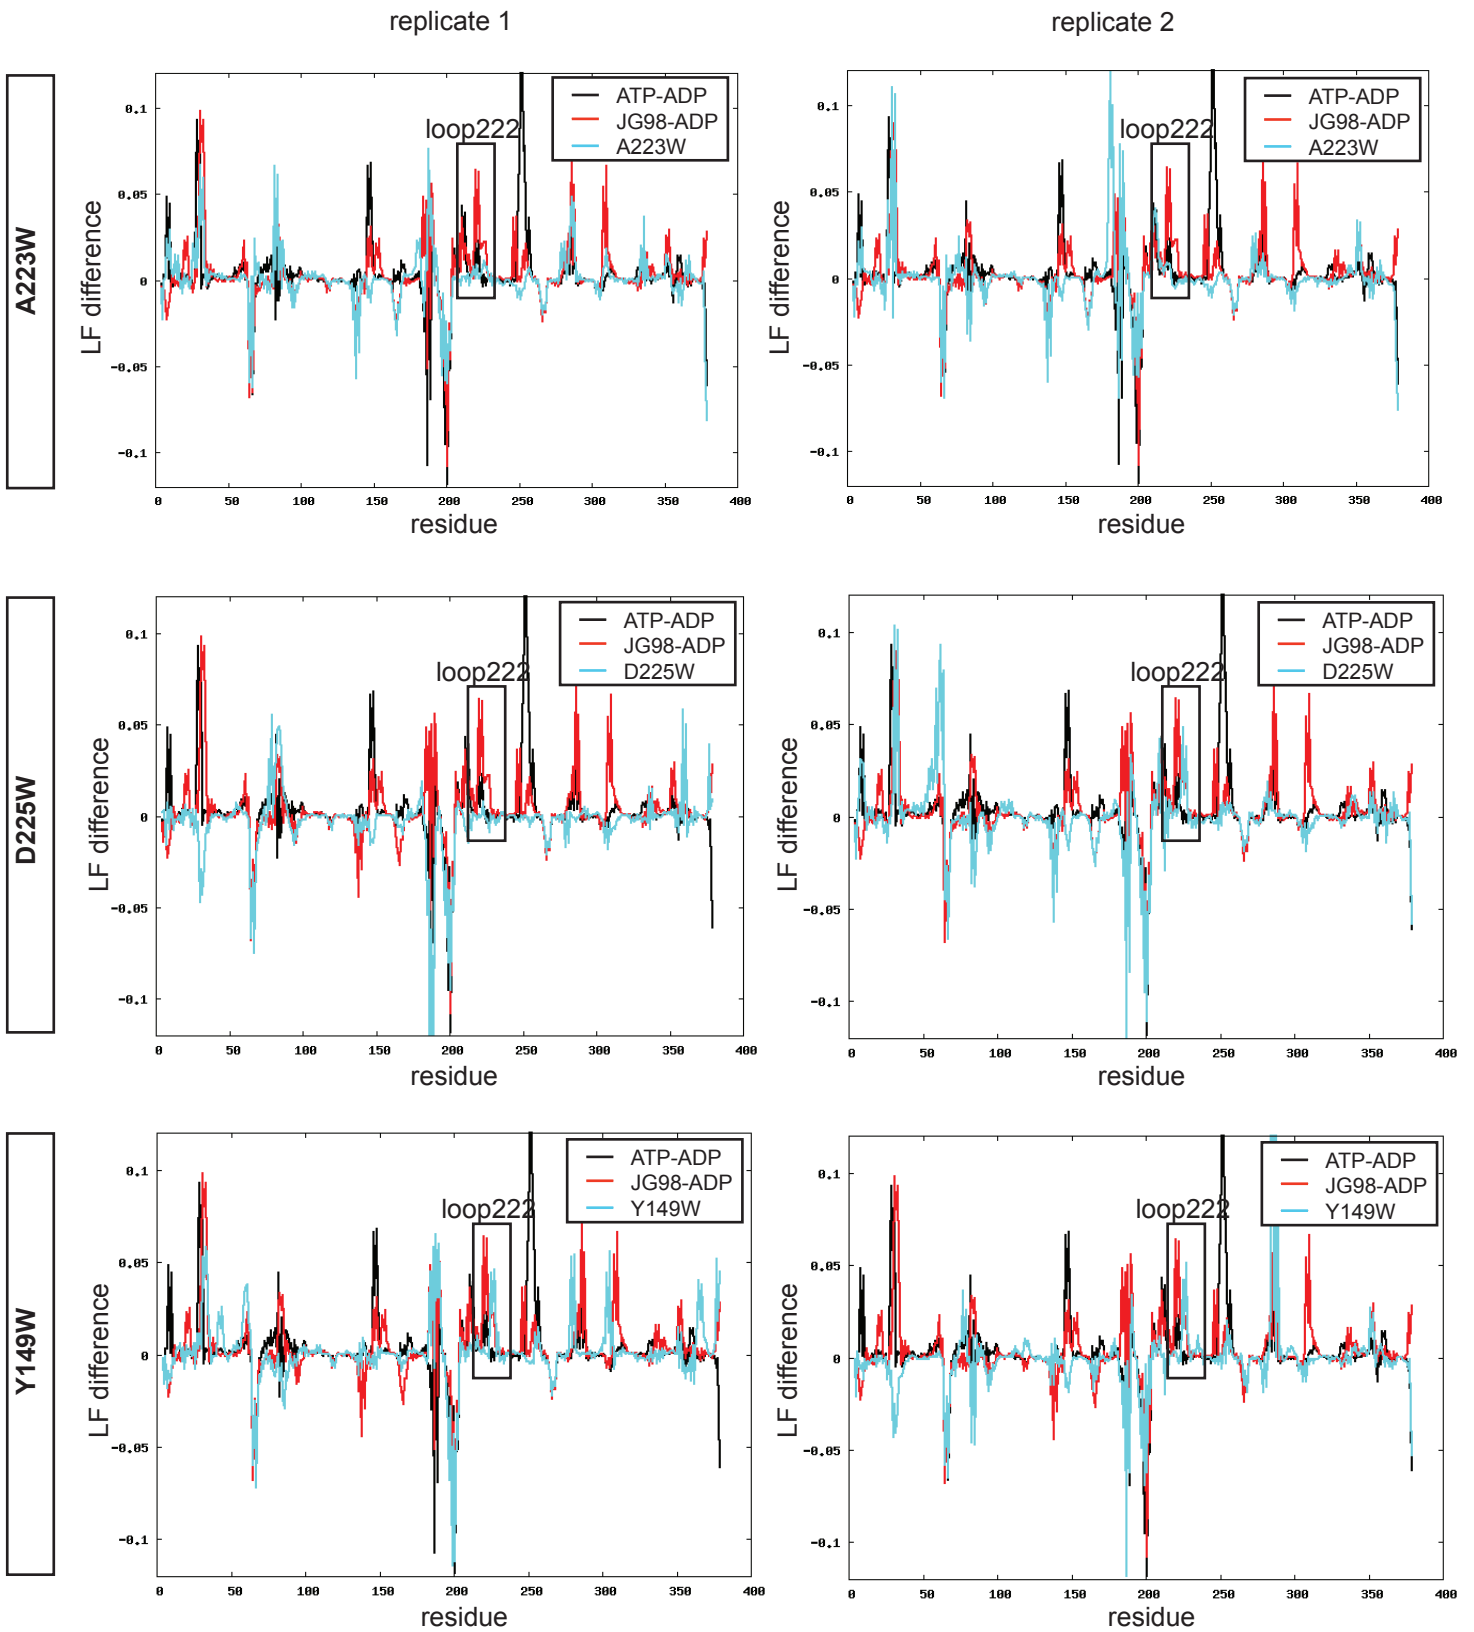

Supplemental Figure 2. Y148W, but not A223W or D225W, partially mirrors the motions in the NBD that accompany the ADP-bound or compound-bound states. Two replicates are shown and the position of loop 222 (see Fig 1) is highlighted.

(A) DnaK mutants are properly folded, based on DSF

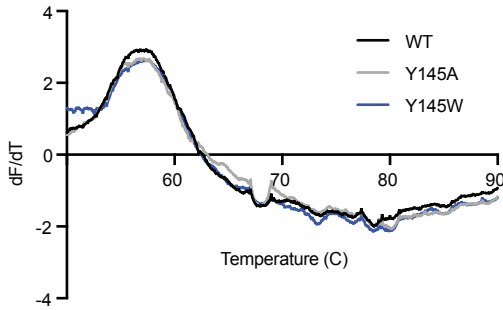

(B) ATPase activity of DnaK Y145W is relatively resistant to JG-48

| DnaK  | JG-48 inhibition of $V_{maxJ}$ (%) |
|-------|------------------------------------|
| WT    | 35%                                |
| Y145W | 8%                                 |

(D) DnaK mutants are expressed at similar levels

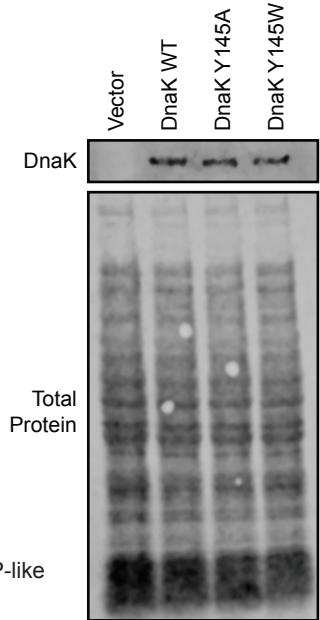

(C) JG-98 stabilizes the ADP-like conformer of Hsc70

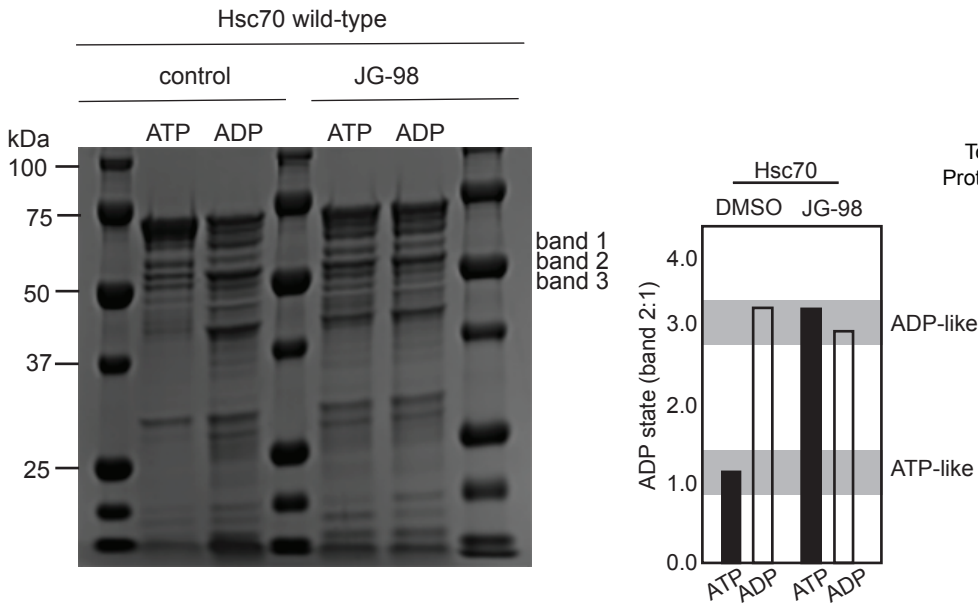

Supplemental Figure 3. Controls for partial proteolysis and bacterial complementation experiments. (A) Differential scanning fluorimetry results on DnaK and its mutants show that the proteins are properly folded ( $T_m$  values  $\sim 58^\circ\text{C}$ ). Results are the average of experiments performed in triplicate. (B) ATPase activity of WT DnaK and Y145W DnaK was measured in the presence of DnaJ and JG-48. The Trp mutant was relatively resistant to the inhibitor, as expected. (C) Partial proteolysis experiments showing that JG-98 ( $10\ \mu\text{M}$ ) is able to stabilize the ADP-like state, even if ATP ( $1\ \text{mM}$ ) is added. The quantification is the result of duplicate experiments and is the ratio of band intensity from band 2:1. Band intensities were determined using Image J. (D) Arabinose-mediated induction of DnaK and its mutants in the  $\Delta dnaK$  *E. coli* strain, showing similar expression levels.

### (A) Workplan for MIC measurements

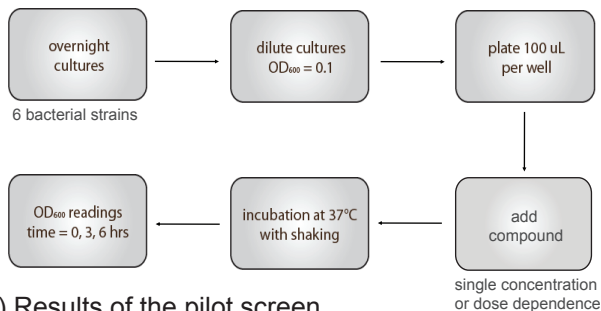

### (B) Results of the pilot screen

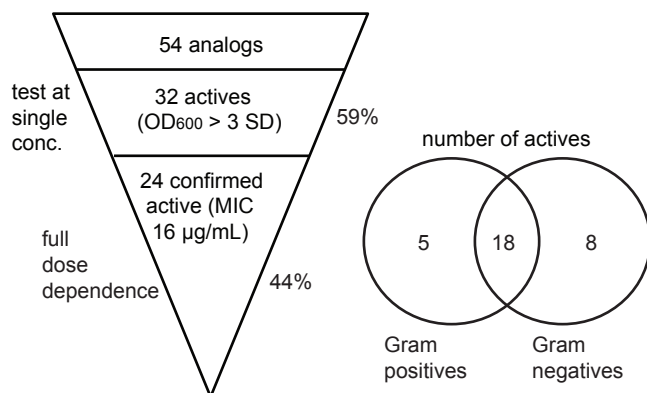

### (D) Structure-activity relationships from the pilot screen

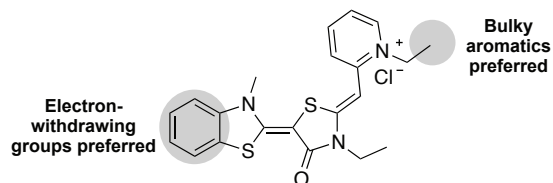

### (C) Confirmed actives (MIC values < 16 µg/mL)

| analog       | <i>B. subtilis</i> | <i>B. anthracis</i> | <i>B. cereus</i> | <i>S. aureus</i> | <i>E. coli</i> | <i>H. influenza</i> |
|--------------|--------------------|---------------------|------------------|------------------|----------------|---------------------|
| MKT077       | ---                | ---                 | >16              | >16              | ---            | 16                  |
| YM1          | ---                | >16                 | ---              | >16              | ---            | 16                  |
| YM9          | ---                | ---                 | ---              | ---              | ---            | >16                 |
| YM21         | ---                | ---                 | ---              | ---              | ---            | >16                 |
| JG12         | >16                | >16                 | ---              | >16              | ---            | 16                  |
| JG18         | ---                | >16                 | ---              | ---              | ---            | >16                 |
| JG31         | ---                | >16                 | ---              | ---              | ---            | 16                  |
| JG33         | >16                | 16                  | 16               | 16               | ---            | 8                   |
| JG35         | ---                | >16                 | ---              | 16               | ---            | 16                  |
| JG37         | ---                | ---                 | ---              | ---              | ---            | >16                 |
| JG38         | ---                | >16                 | >16              | ---              | ---            | 16                  |
| JG41         | ---                | 16                  | >16              | >16              | ---            | 8                   |
| JG43         | 16                 | 8                   | 8                | 8                | ---            | 8                   |
| JG58         | ---                | ---                 | ---              | ---              | ---            | ---                 |
| JG60         | ---                | >16                 | >16              | >16              | ---            | >16                 |
| JG61         | ---                | ---                 | ---              | ---              | ---            | 16                  |
| JG66         | ---                | >16                 | ---              | >16              | ---            | ---                 |
| JG70         | 8                  | 8                   | 8                | 8                | ---            | 16                  |
| JG71         | >16                | ---                 | ---              | 4                | >16            | ---                 |
| JG73         | 16                 | 8                   | 16               | 16               | >16            | 8                   |
| JG74         | ---                | 8                   | 8                | 8                | >16            | 4                   |
| JG78         | ---                | 4                   | 8                | 4                | ---            | 8                   |
| JG81         | >16                | >16                 | >16              | >16              | ---            | 16                  |
| JG83         | 8                  | 4                   | 16               | 8                | ---            | 4                   |
| JG86         | ---                | 16                  | ---              | >16              | ---            | 8                   |
| JG91         | >16                | 16                  | >16              | 16               | ---            | 4                   |
| JG96         | >16                | 8                   | 8                | 8                | ---            | 16                  |
| JG97         | 16                 | 4                   | 8                | 8                | ---            | 16                  |
| <b>JG98</b>  | 2                  | ---                 | ---              | ---              | ---            | ---                 |
| JG111        | ---                | 16                  | ---              | >16              | ---            | ---                 |
| JG121        | >16                | >16                 | ---              | ---              | ---            | 16                  |
| JG123        | ---                | ---                 | ---              | ---              | ---            | >16                 |
| tetracycline | 2                  | 0.25                | 0.5              | 1                | 4              | 1                   |
| DMSO         | >16                | >16                 | >16              | >16              | >16            | >16                 |

Supplemental Figure 4. Pilot screen of JG-98 analogs against a panel of bacteria. (A) Schematic of the method for determination of anti-bacterial activity. In the pilot screen, 54 compounds were tested at a single concentration (16 µg/mL). If the compound reduced growth by 3SD of the negative control (1% DMSO) for any of the 6 bacterial strains, then it was selected for MIC determination (12 concentrations). Confirmed actives were defined as those with MIC values of 16 µg/mL or better. Compounds that were not active in the initial screen were not retested for dose dependence (---). All pilot screen experiments performed at 37 °C. Compounds are described in Li *et al.* 2013 *ACS Med. Chem. Lett.* 4:1042.

01152014\_1  
STANDARD 1H OBSERVE

8.25  
8.25  
8.24  
8.24

7.89  
7.88  
7.84  
7.84  
7.63  
7.61  
7.43  
7.42  
7.42  
7.41  
7.36  
7.34  
6.52

5.75

4.12  
4.09  
4.07  
4.06  
4.04  
4.02  
4.00

3.03  
3.02  
3.00  
2.98  
2.97  
2.51  
2.50  
2.50  
2.50  
2.49

1.99

1.25  
1.23  
1.19  
1.17  
1.16  
0.99  
0.97  
0.96

Compound 1

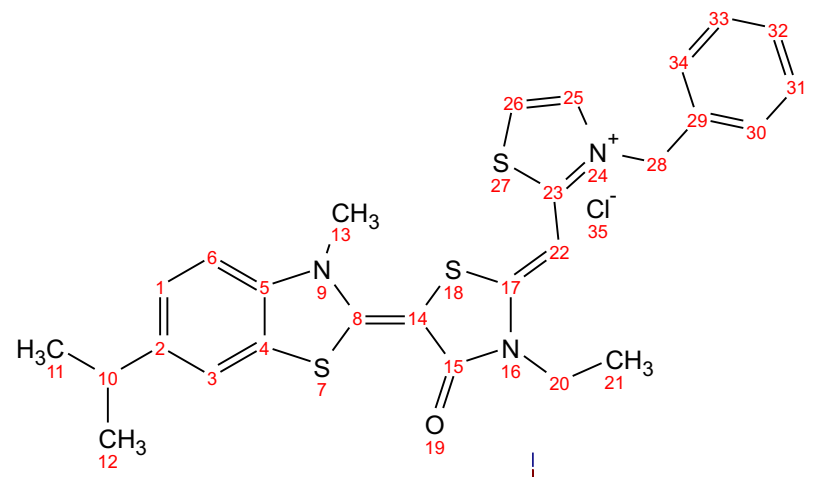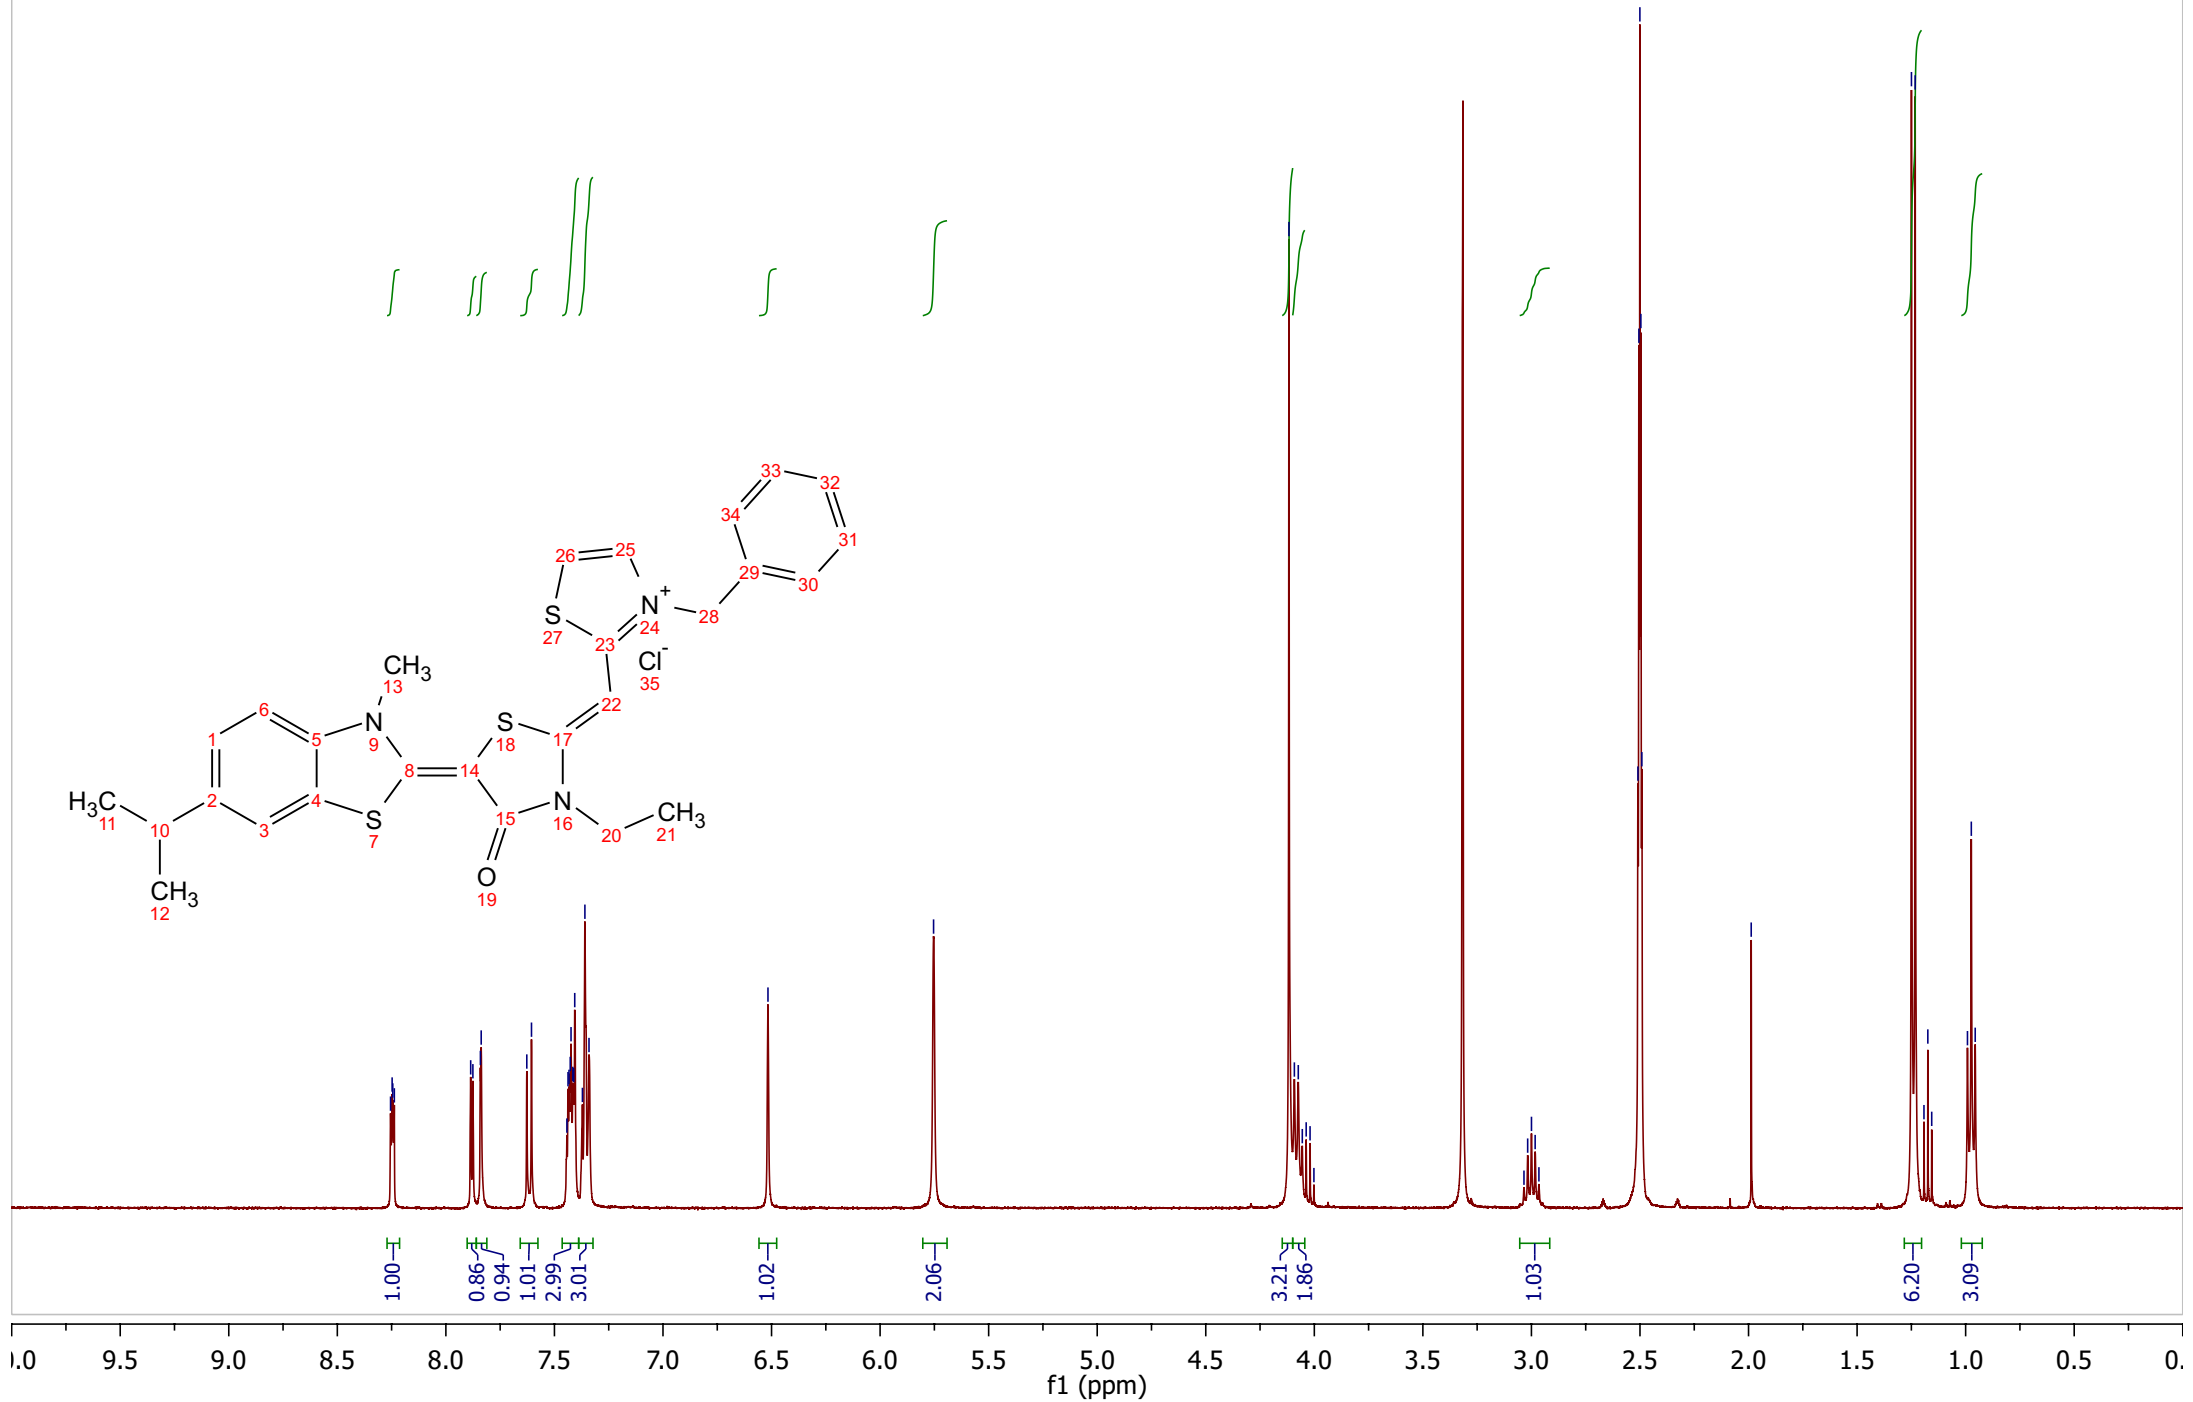

Compound 2

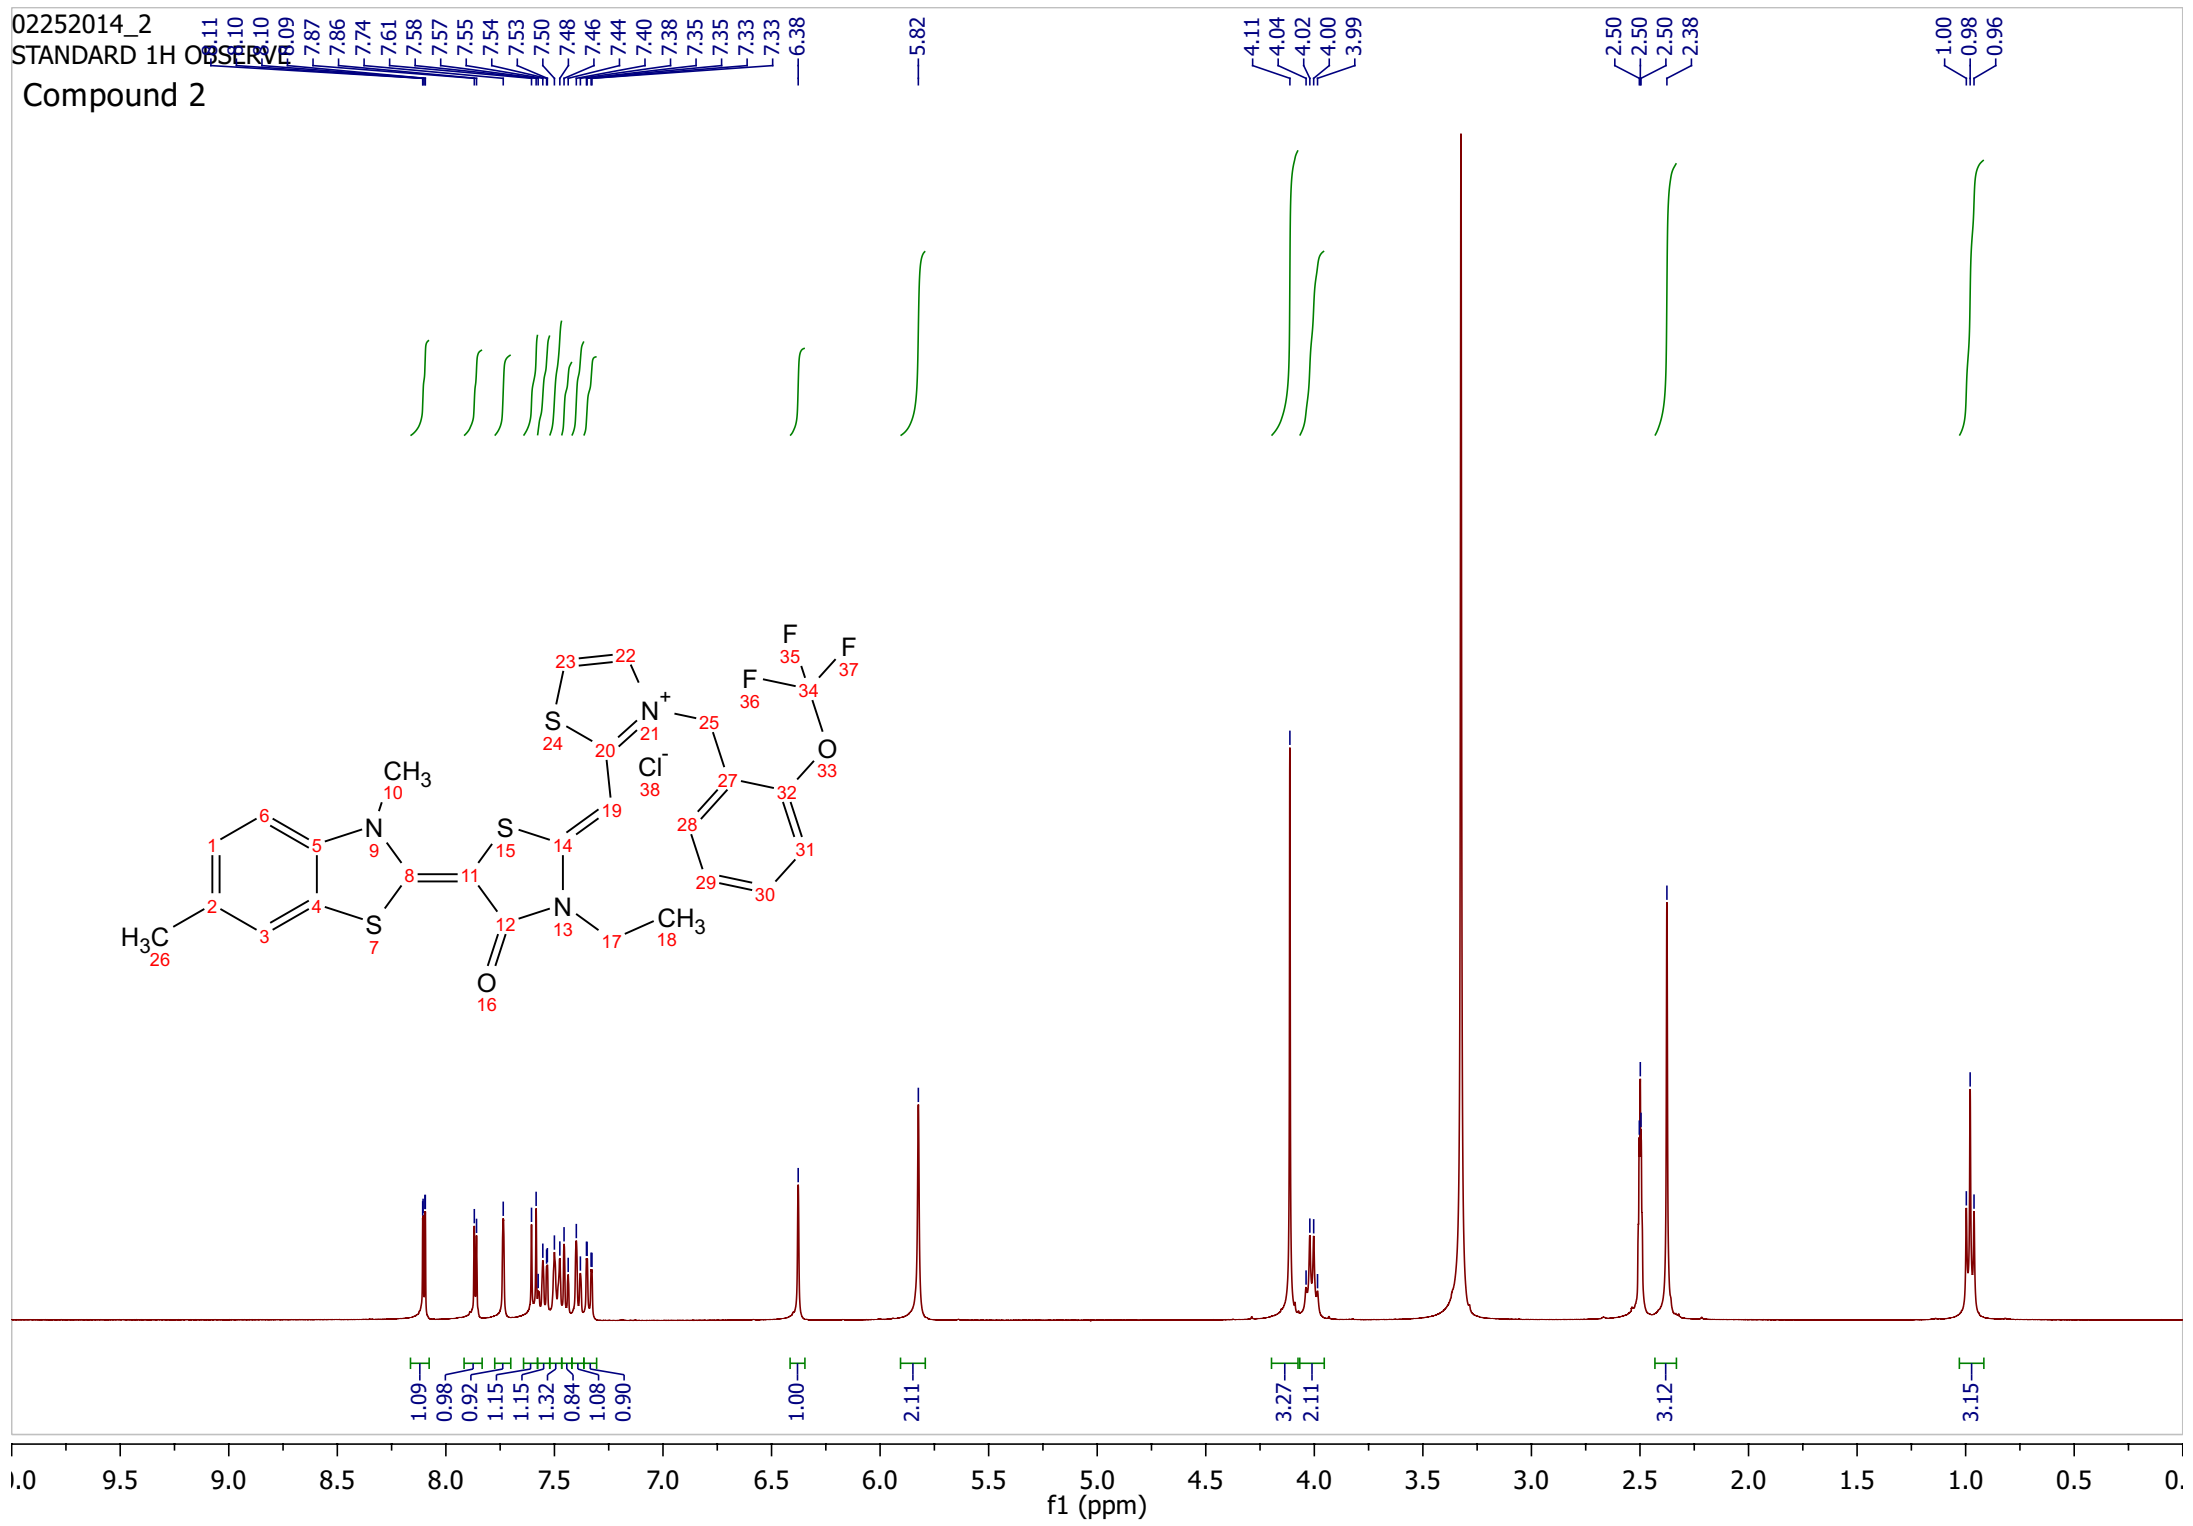

03052011  
STANDARD 1H-OBSERVE

### Compound 3

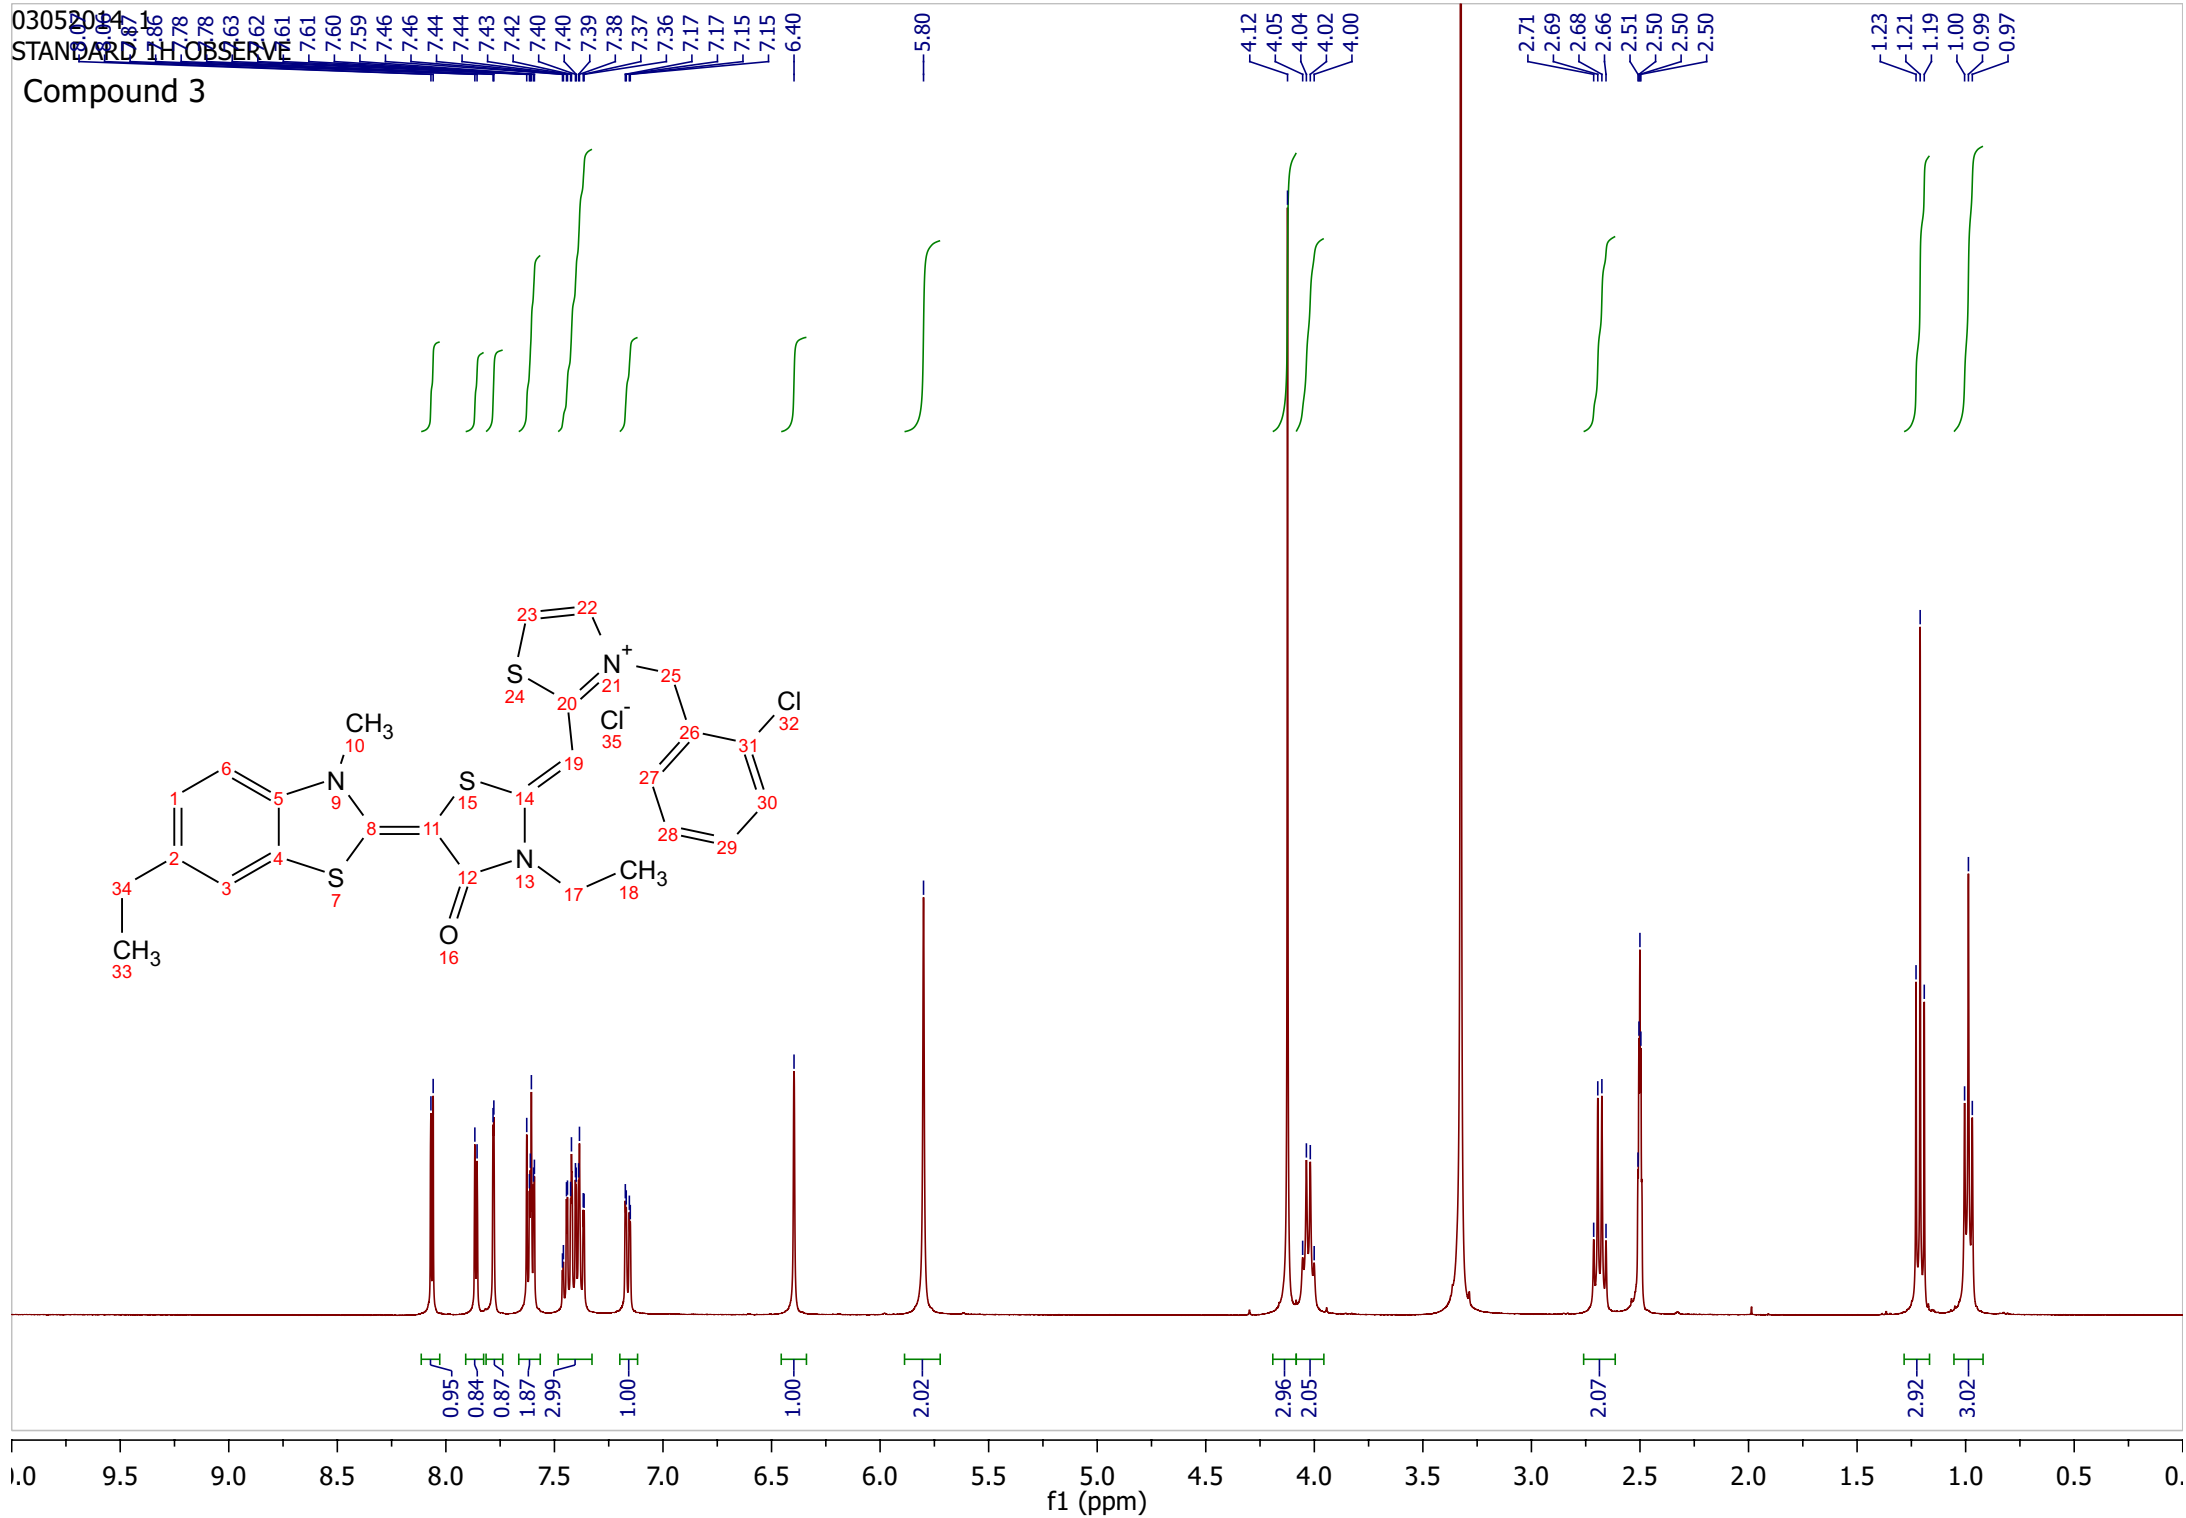

03052014\_00  
STANDARD 1H OBSERVE

Compound 4

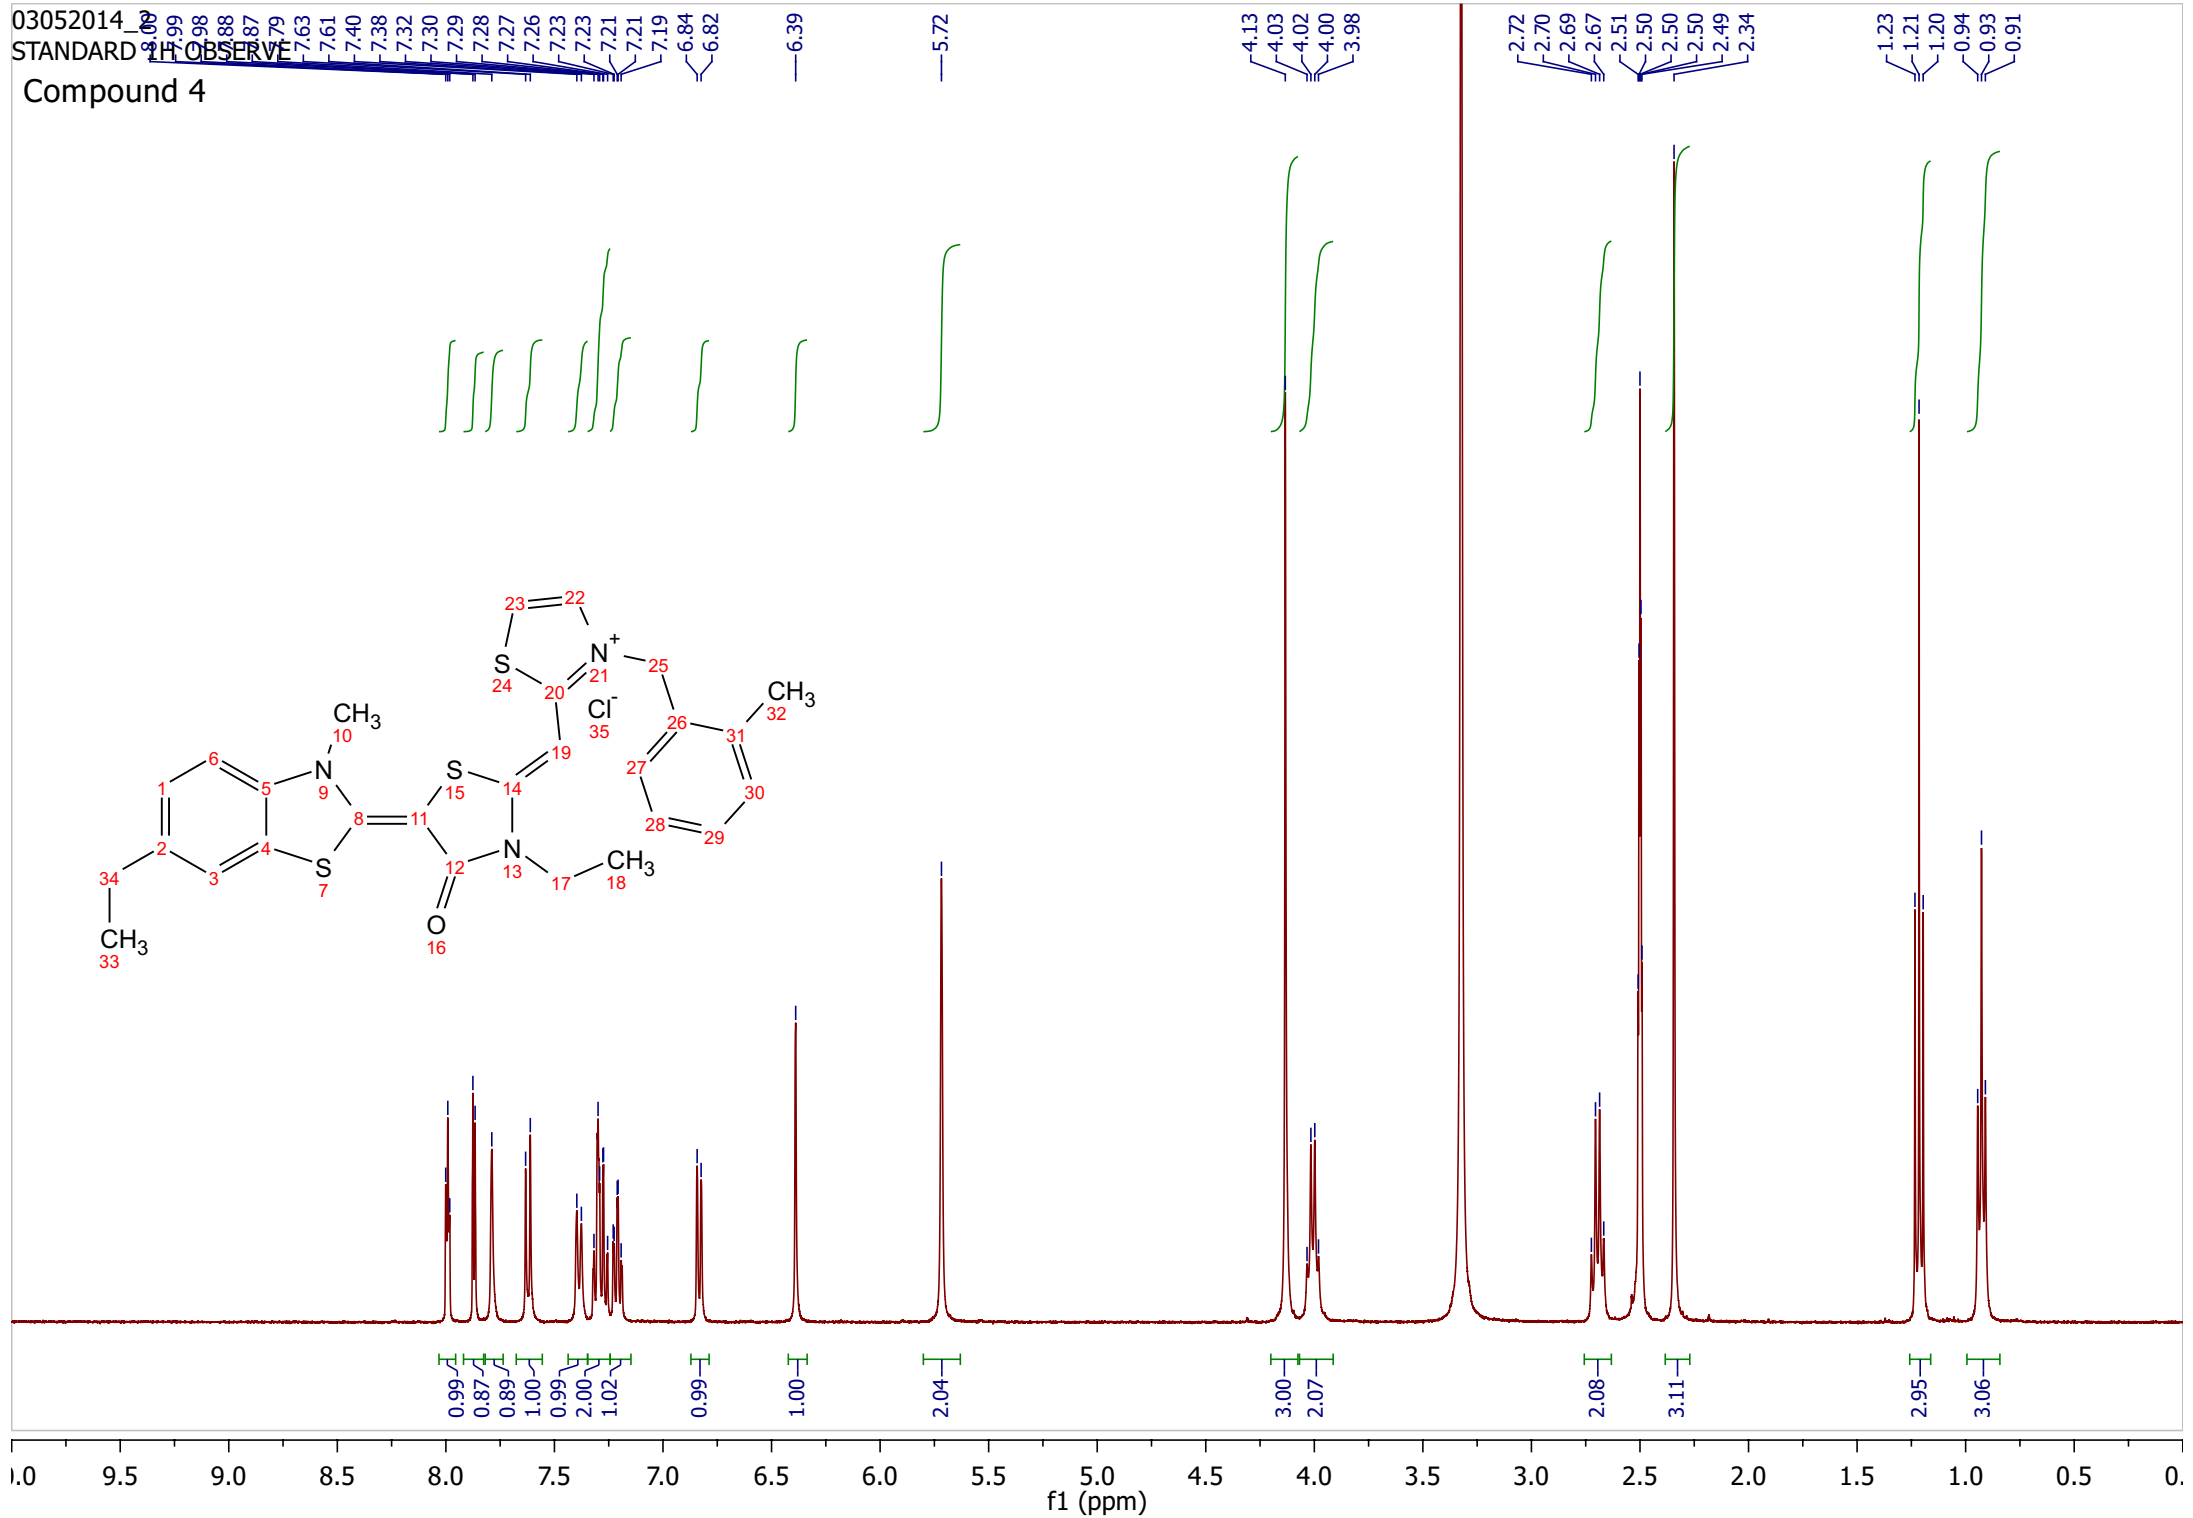



Compound 5

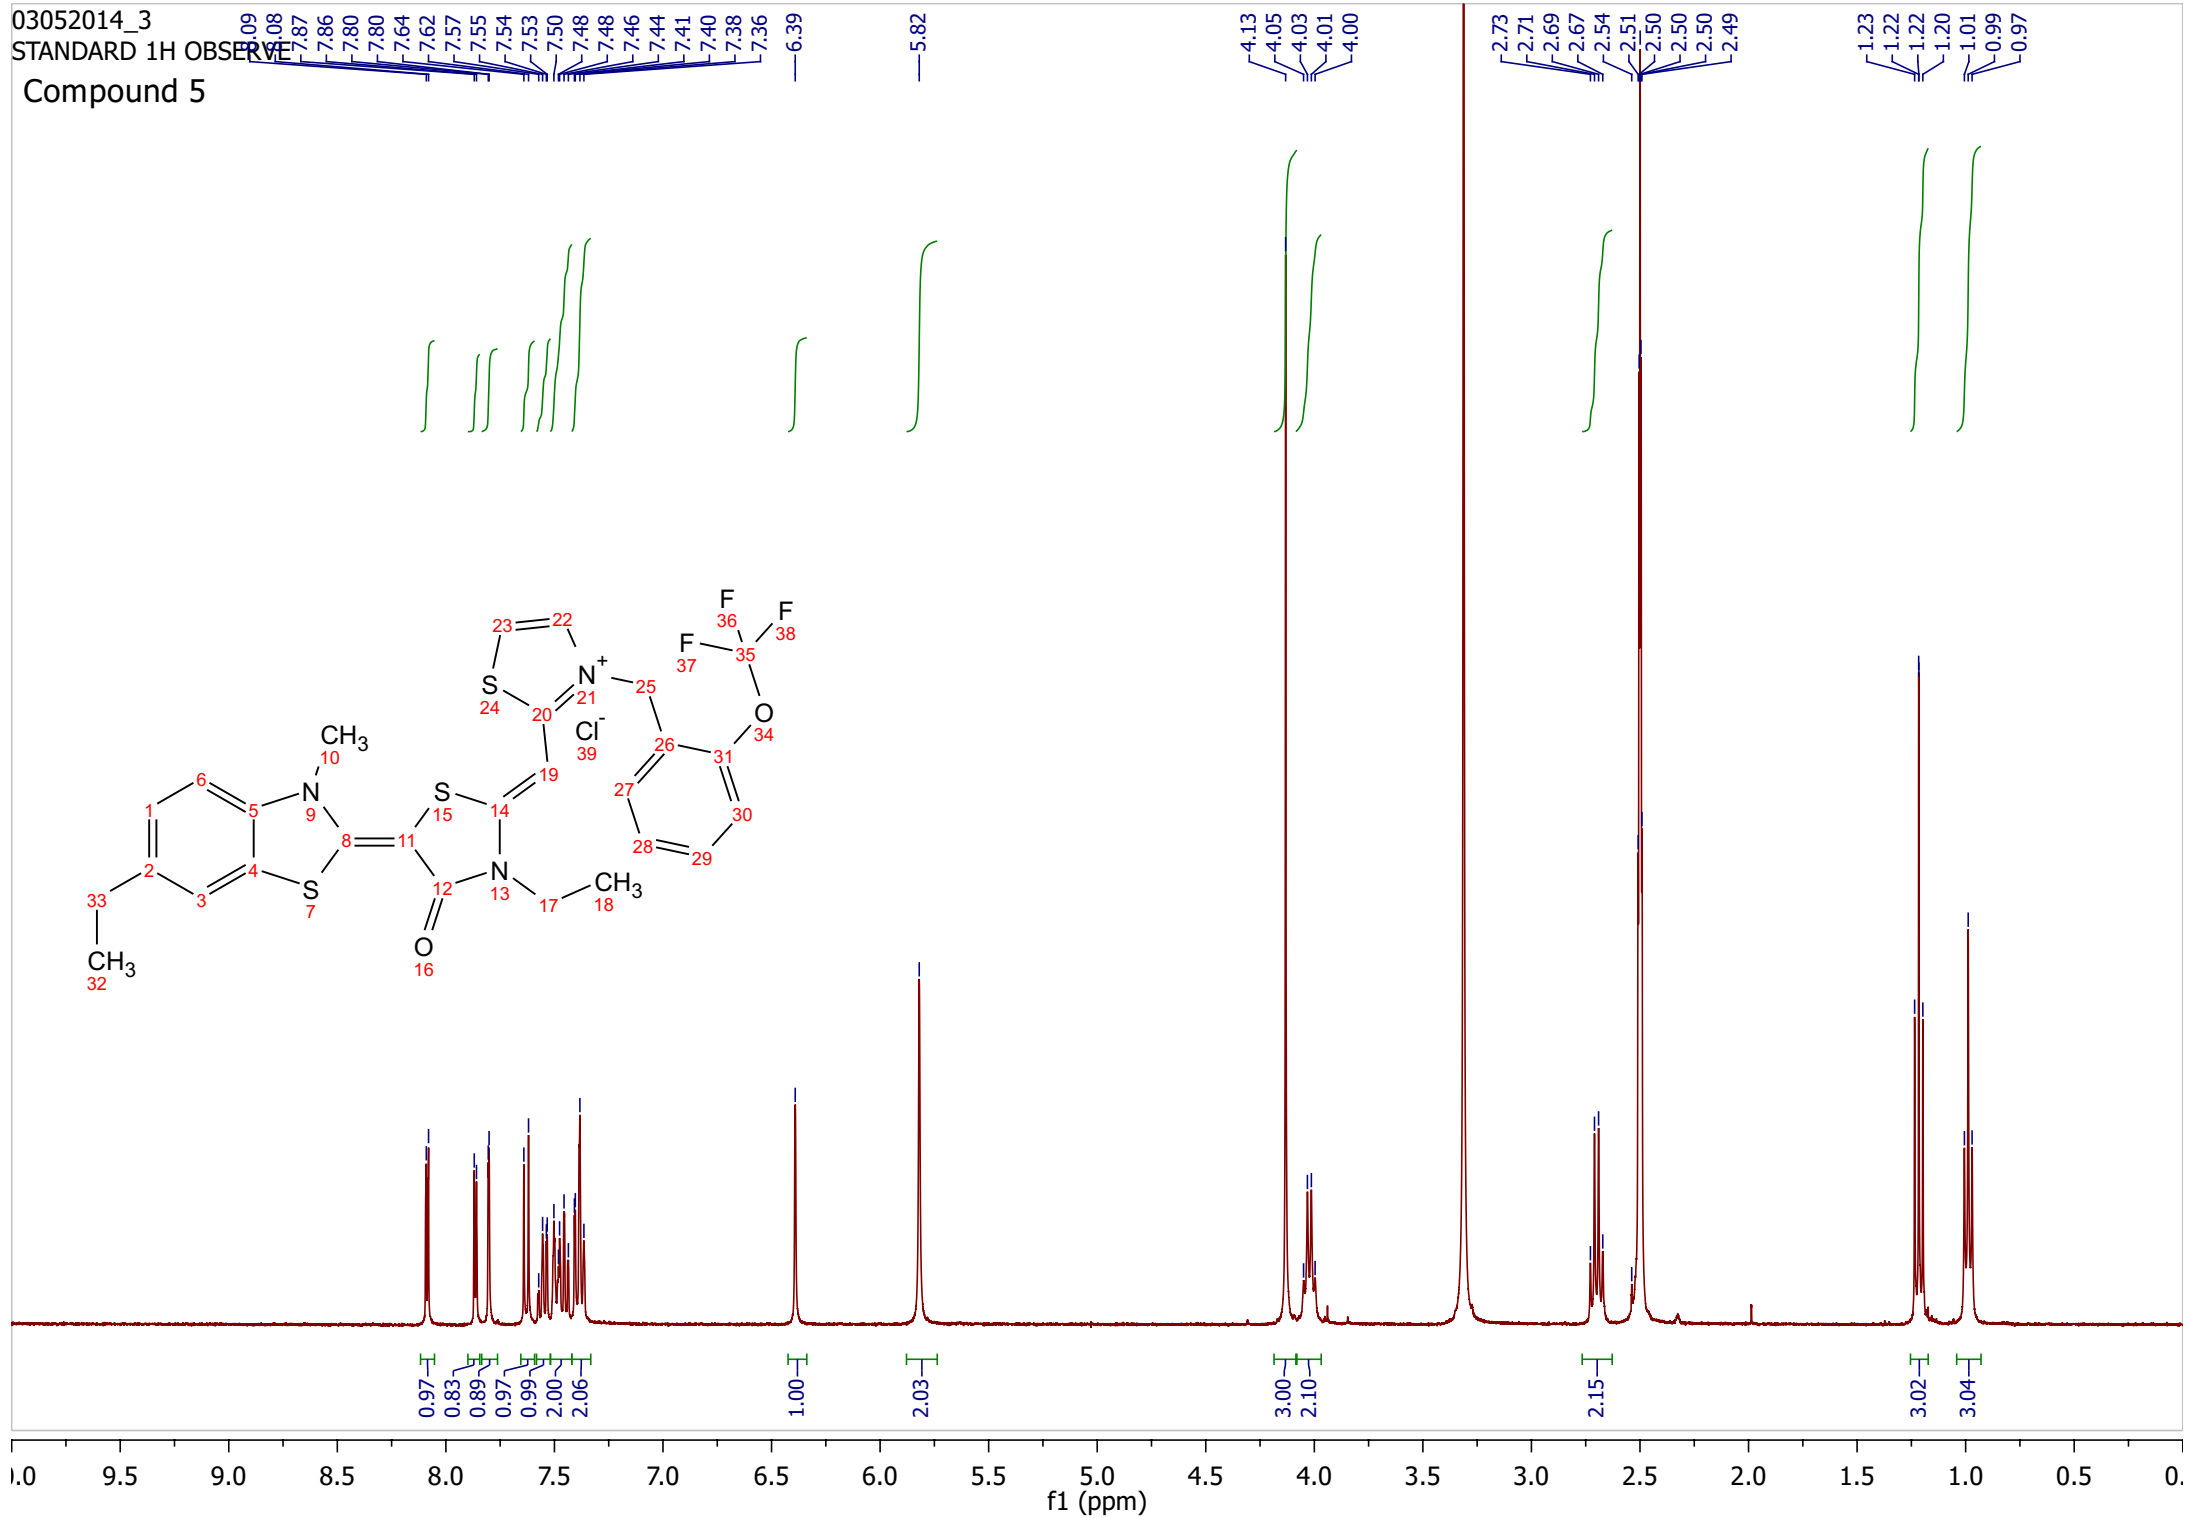

Compound 6

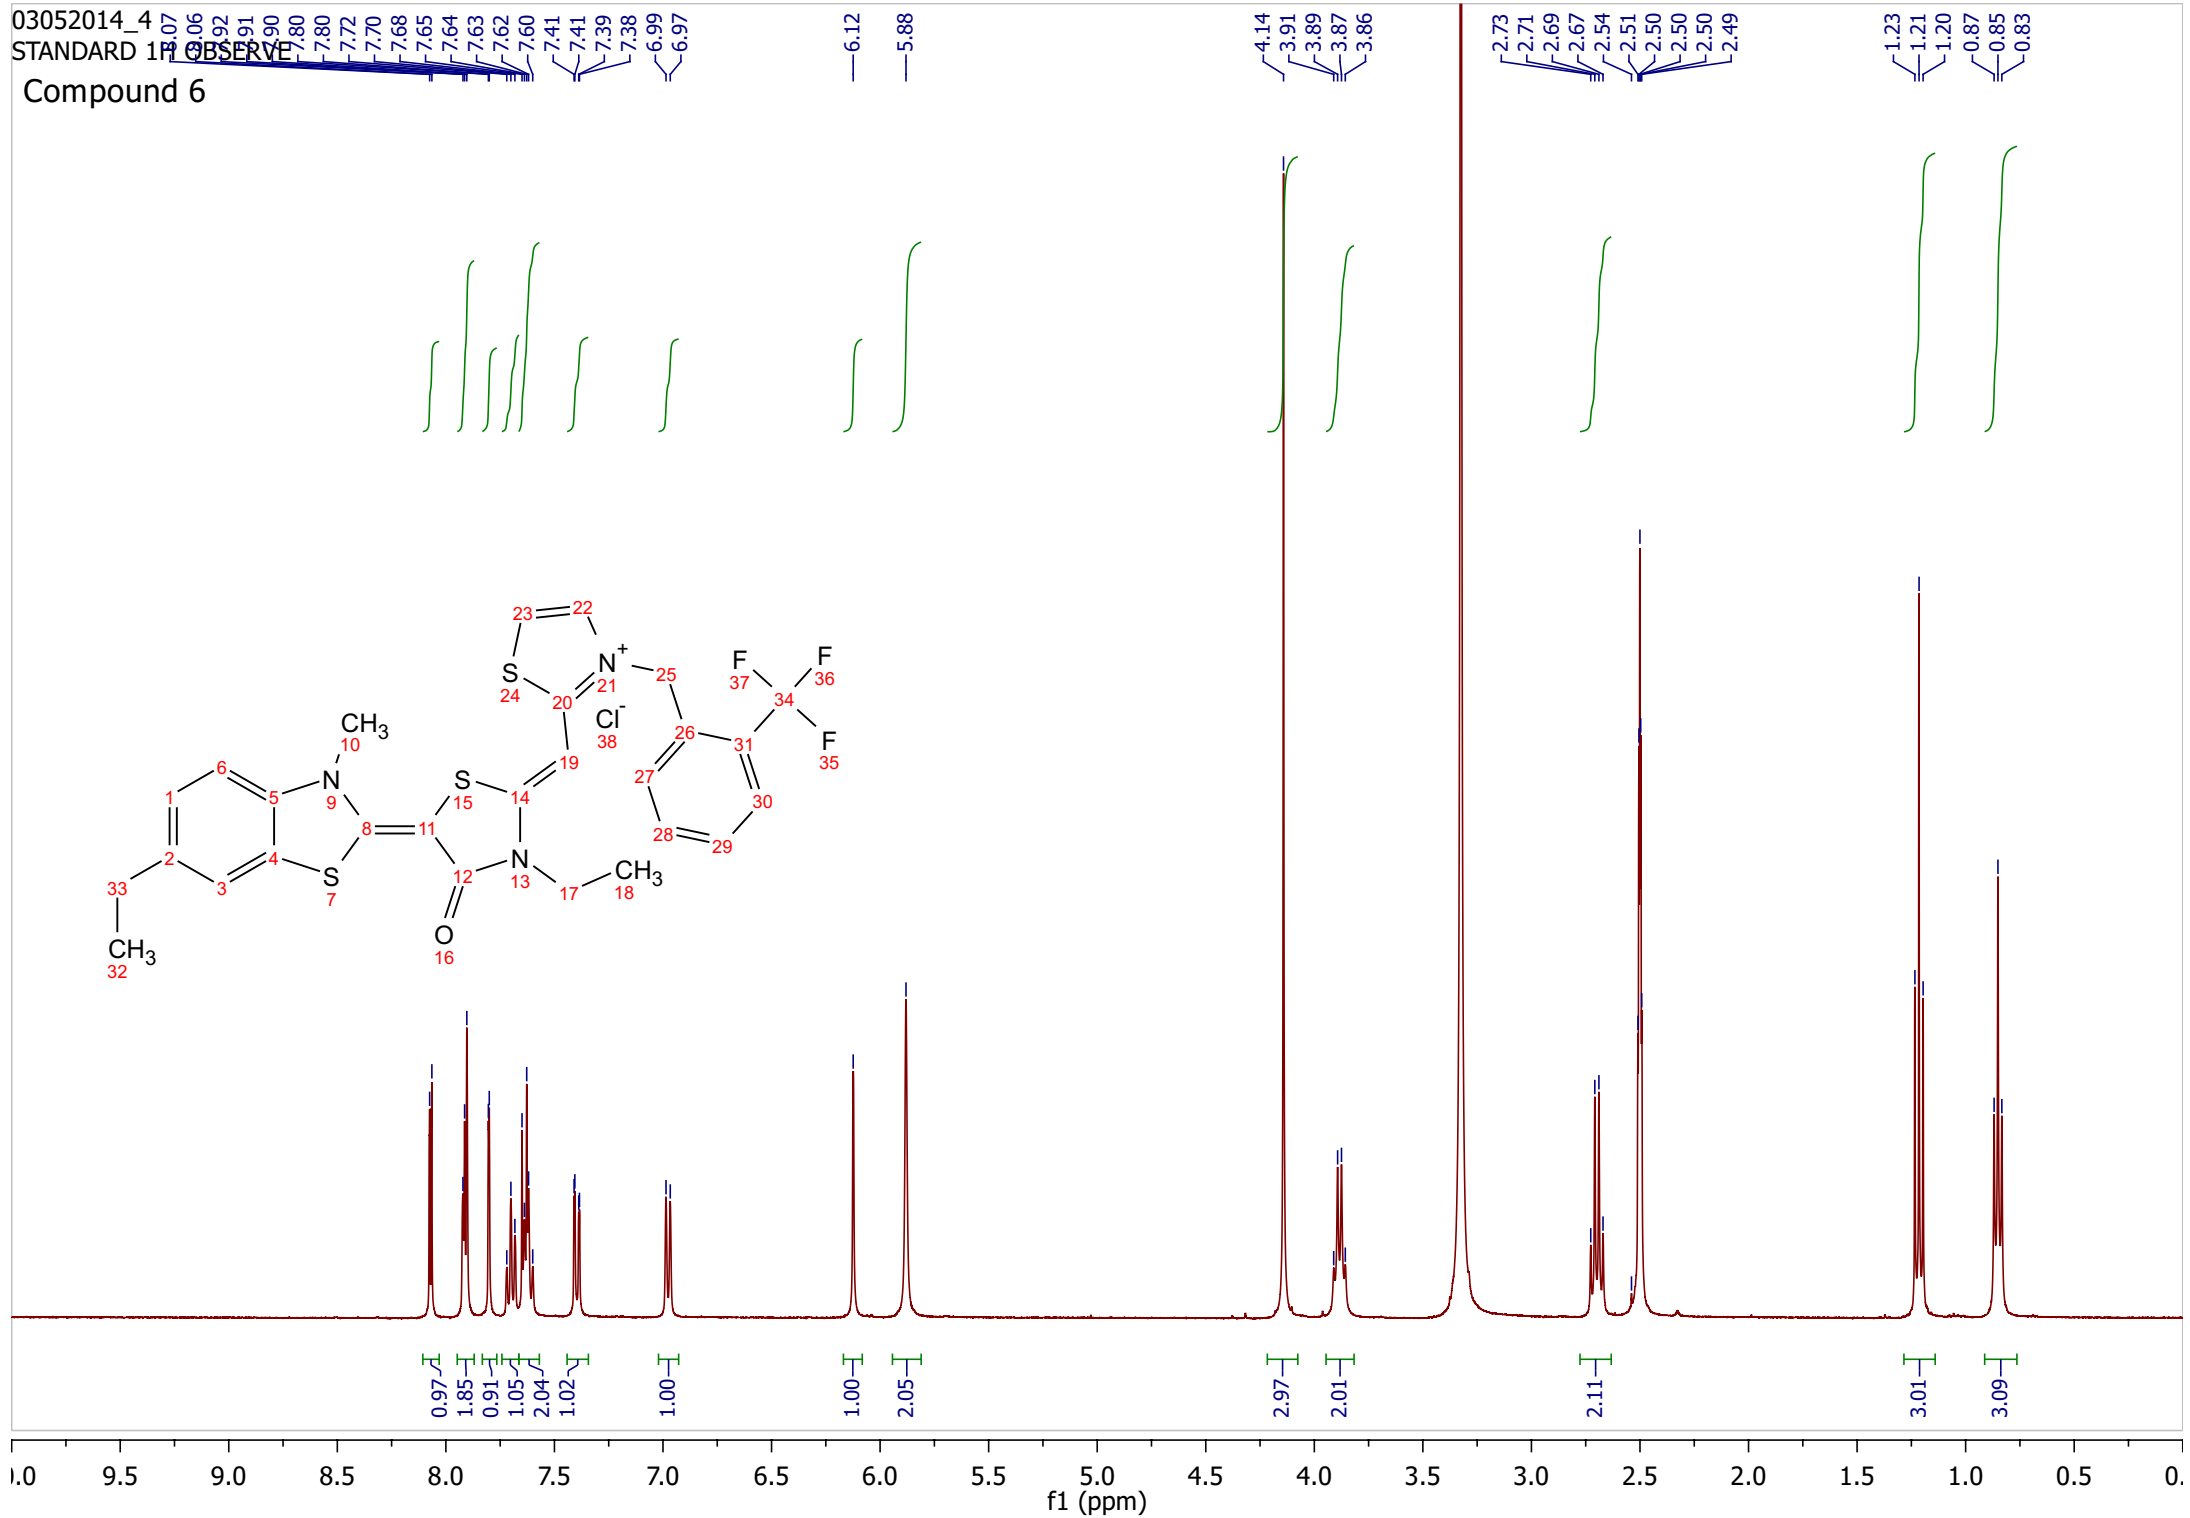

03062014\_4  
STANDARD 1H OBSERVE

Compound 7

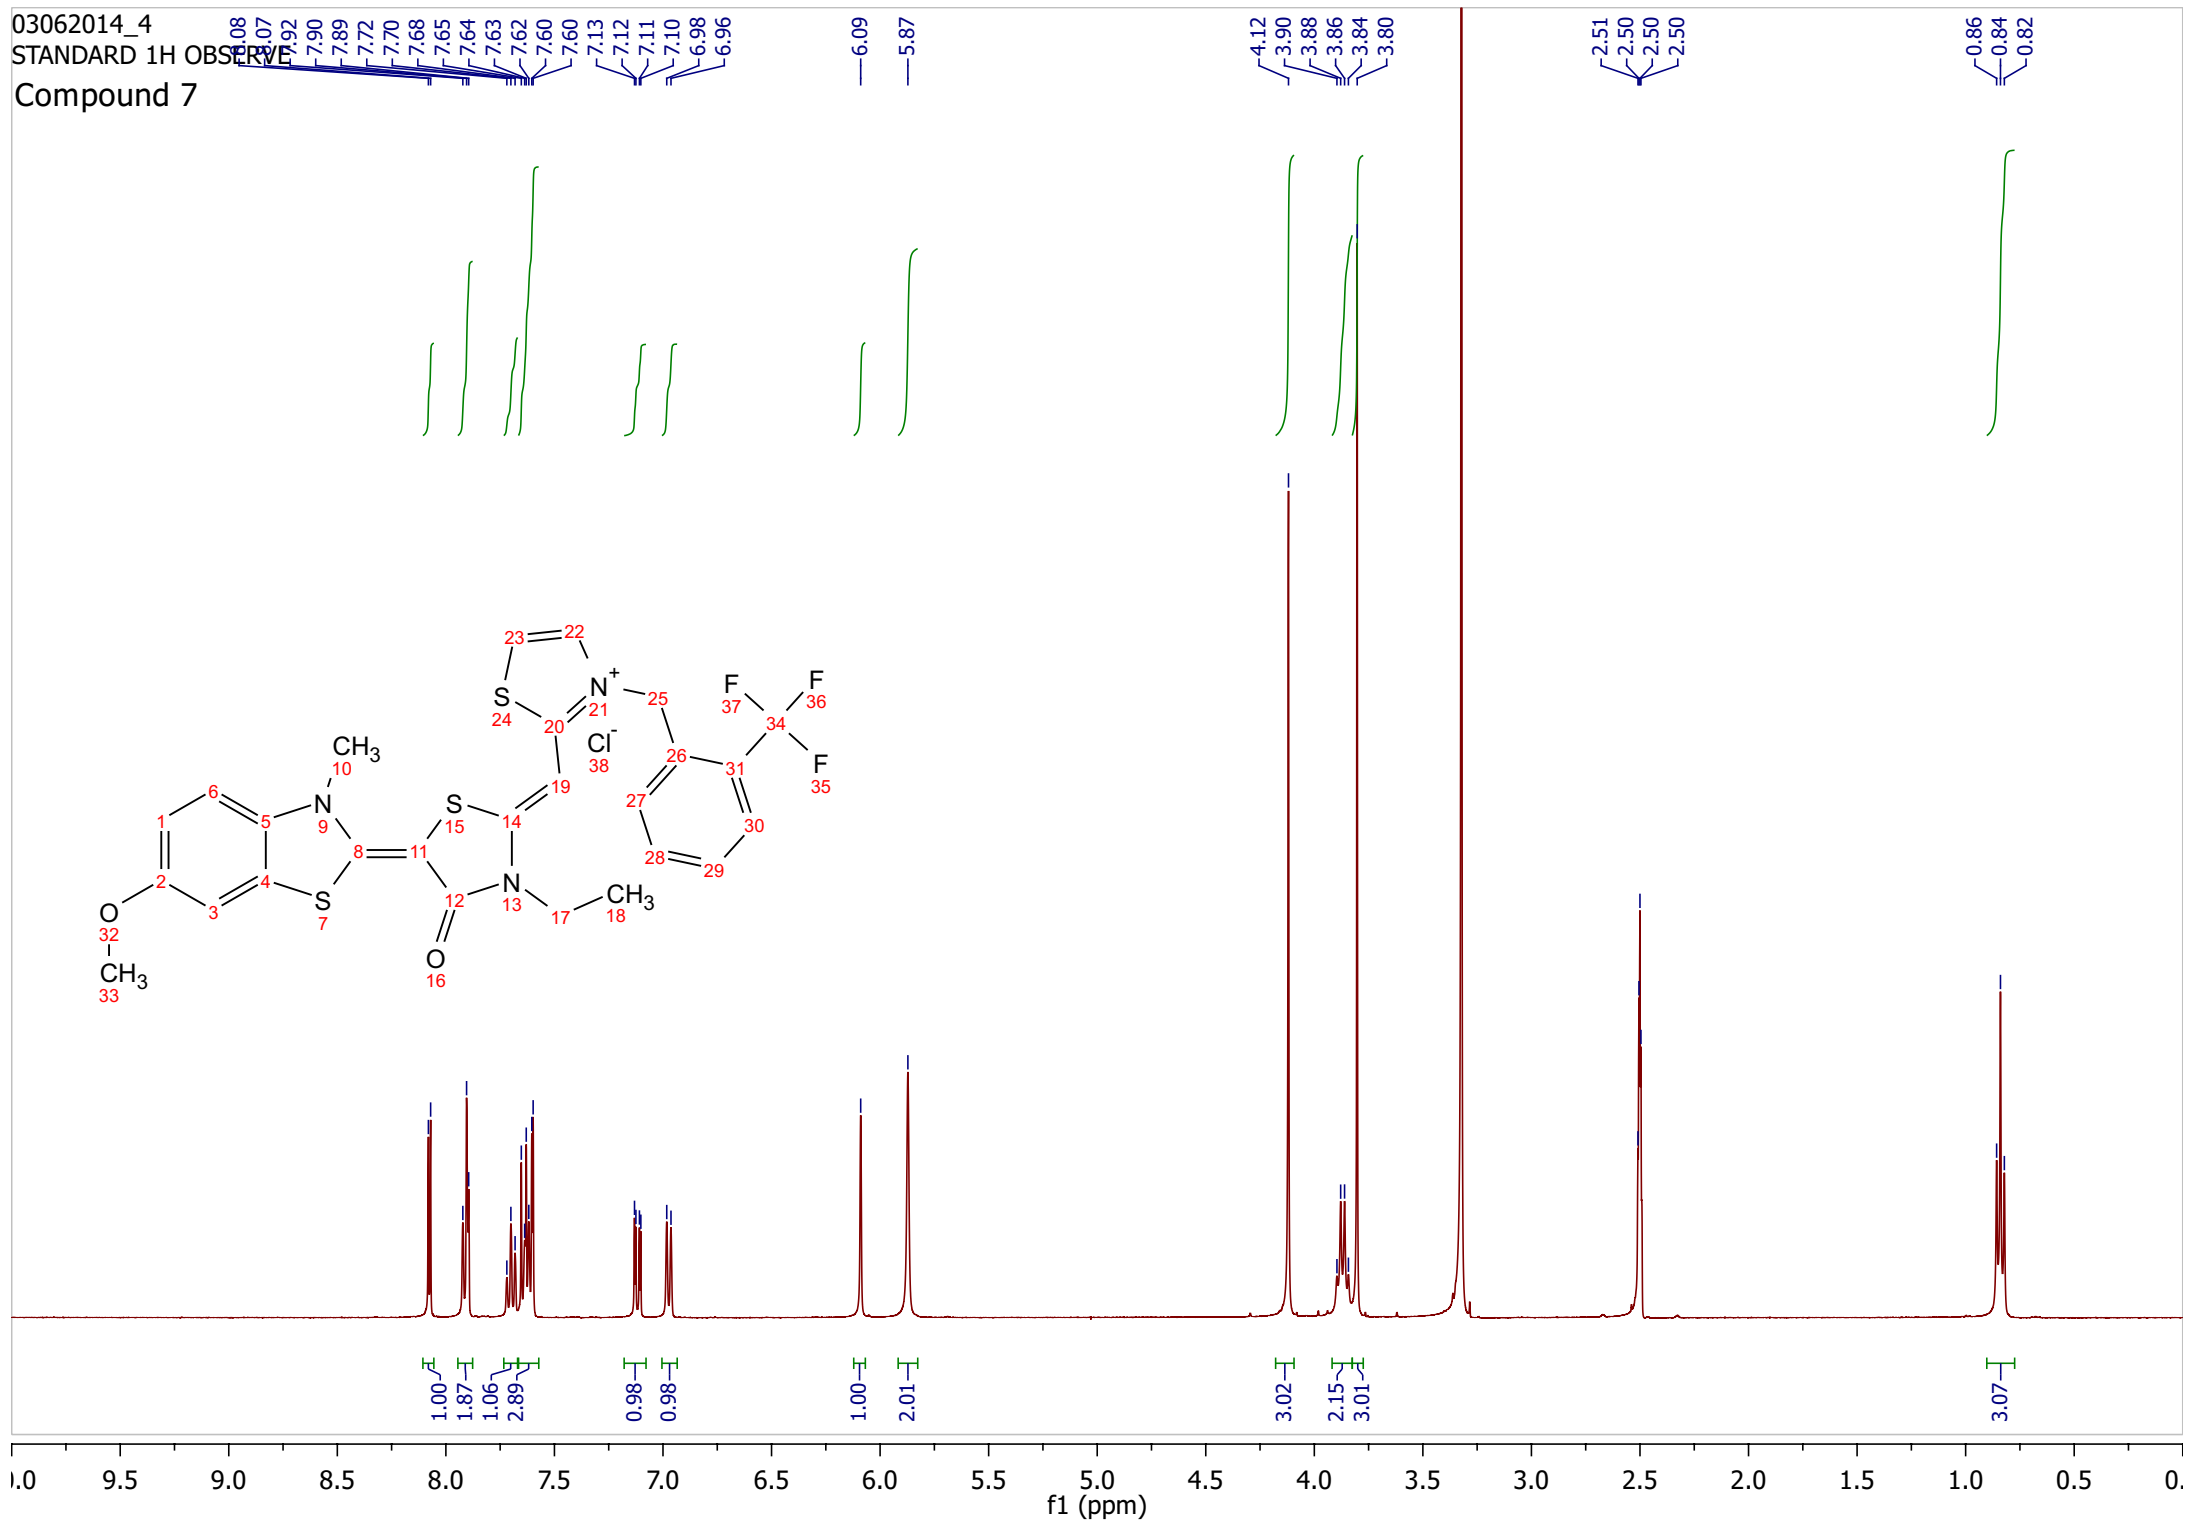

03122014\_2  
STANDARD 1H OBSERVE

JG-324

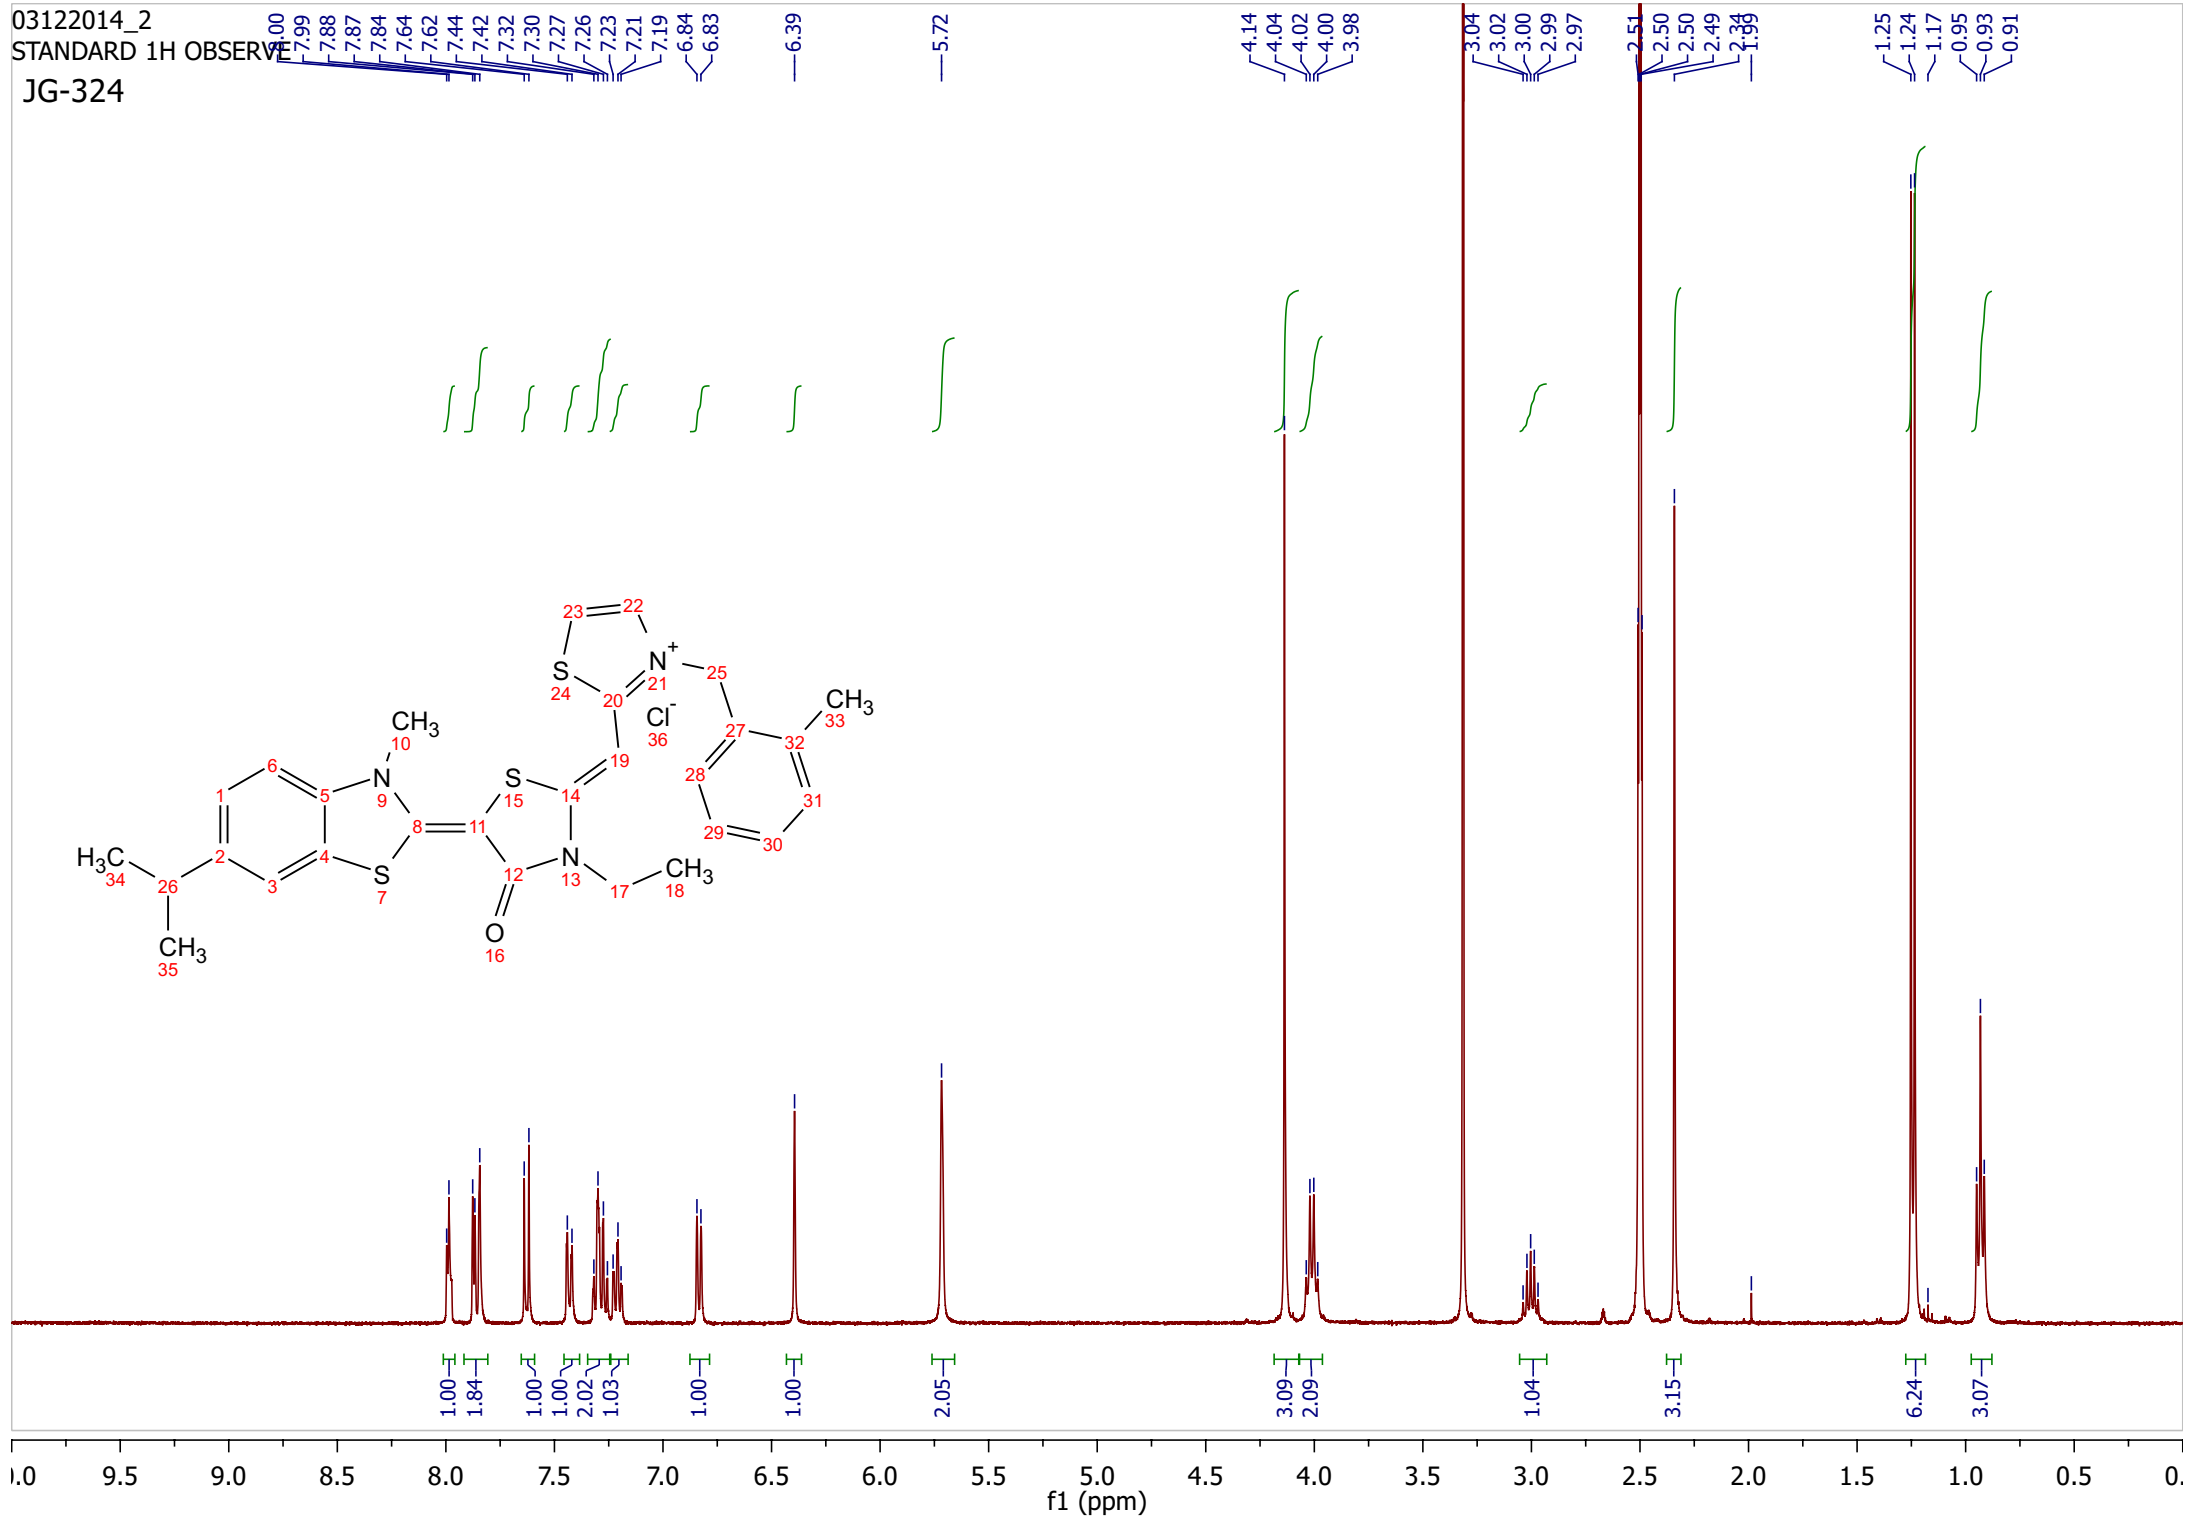

03122014\_3  
STANDARD 1H OBSERVE

JG-325

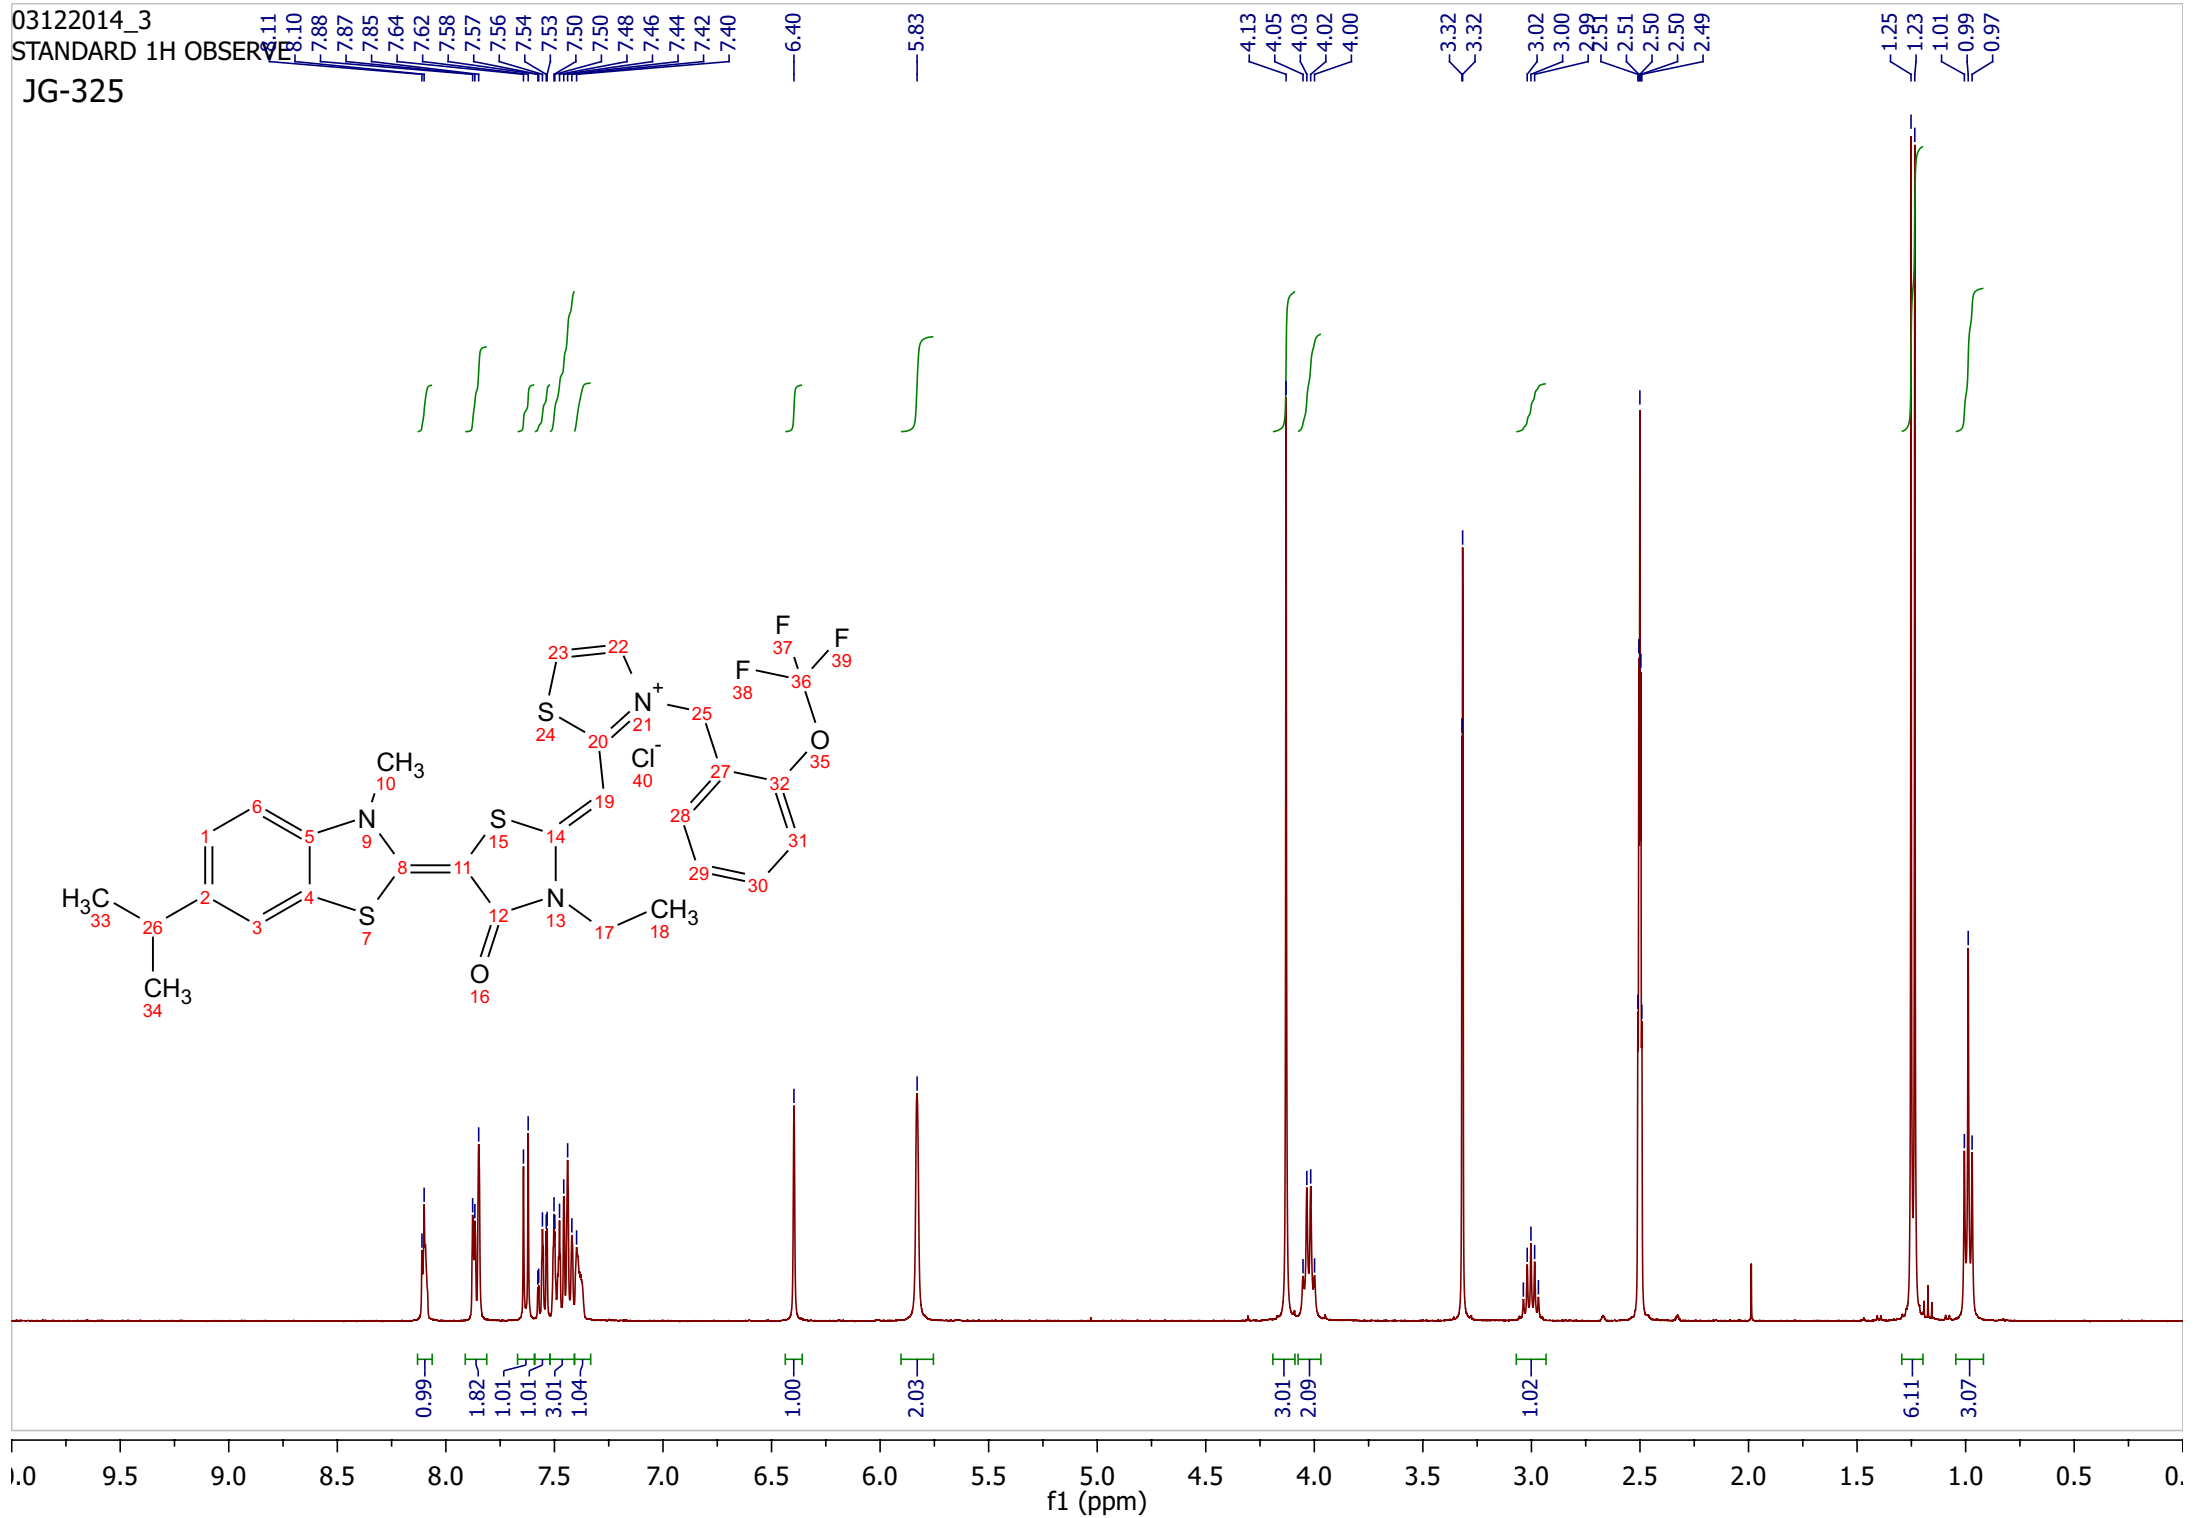

Compound 10

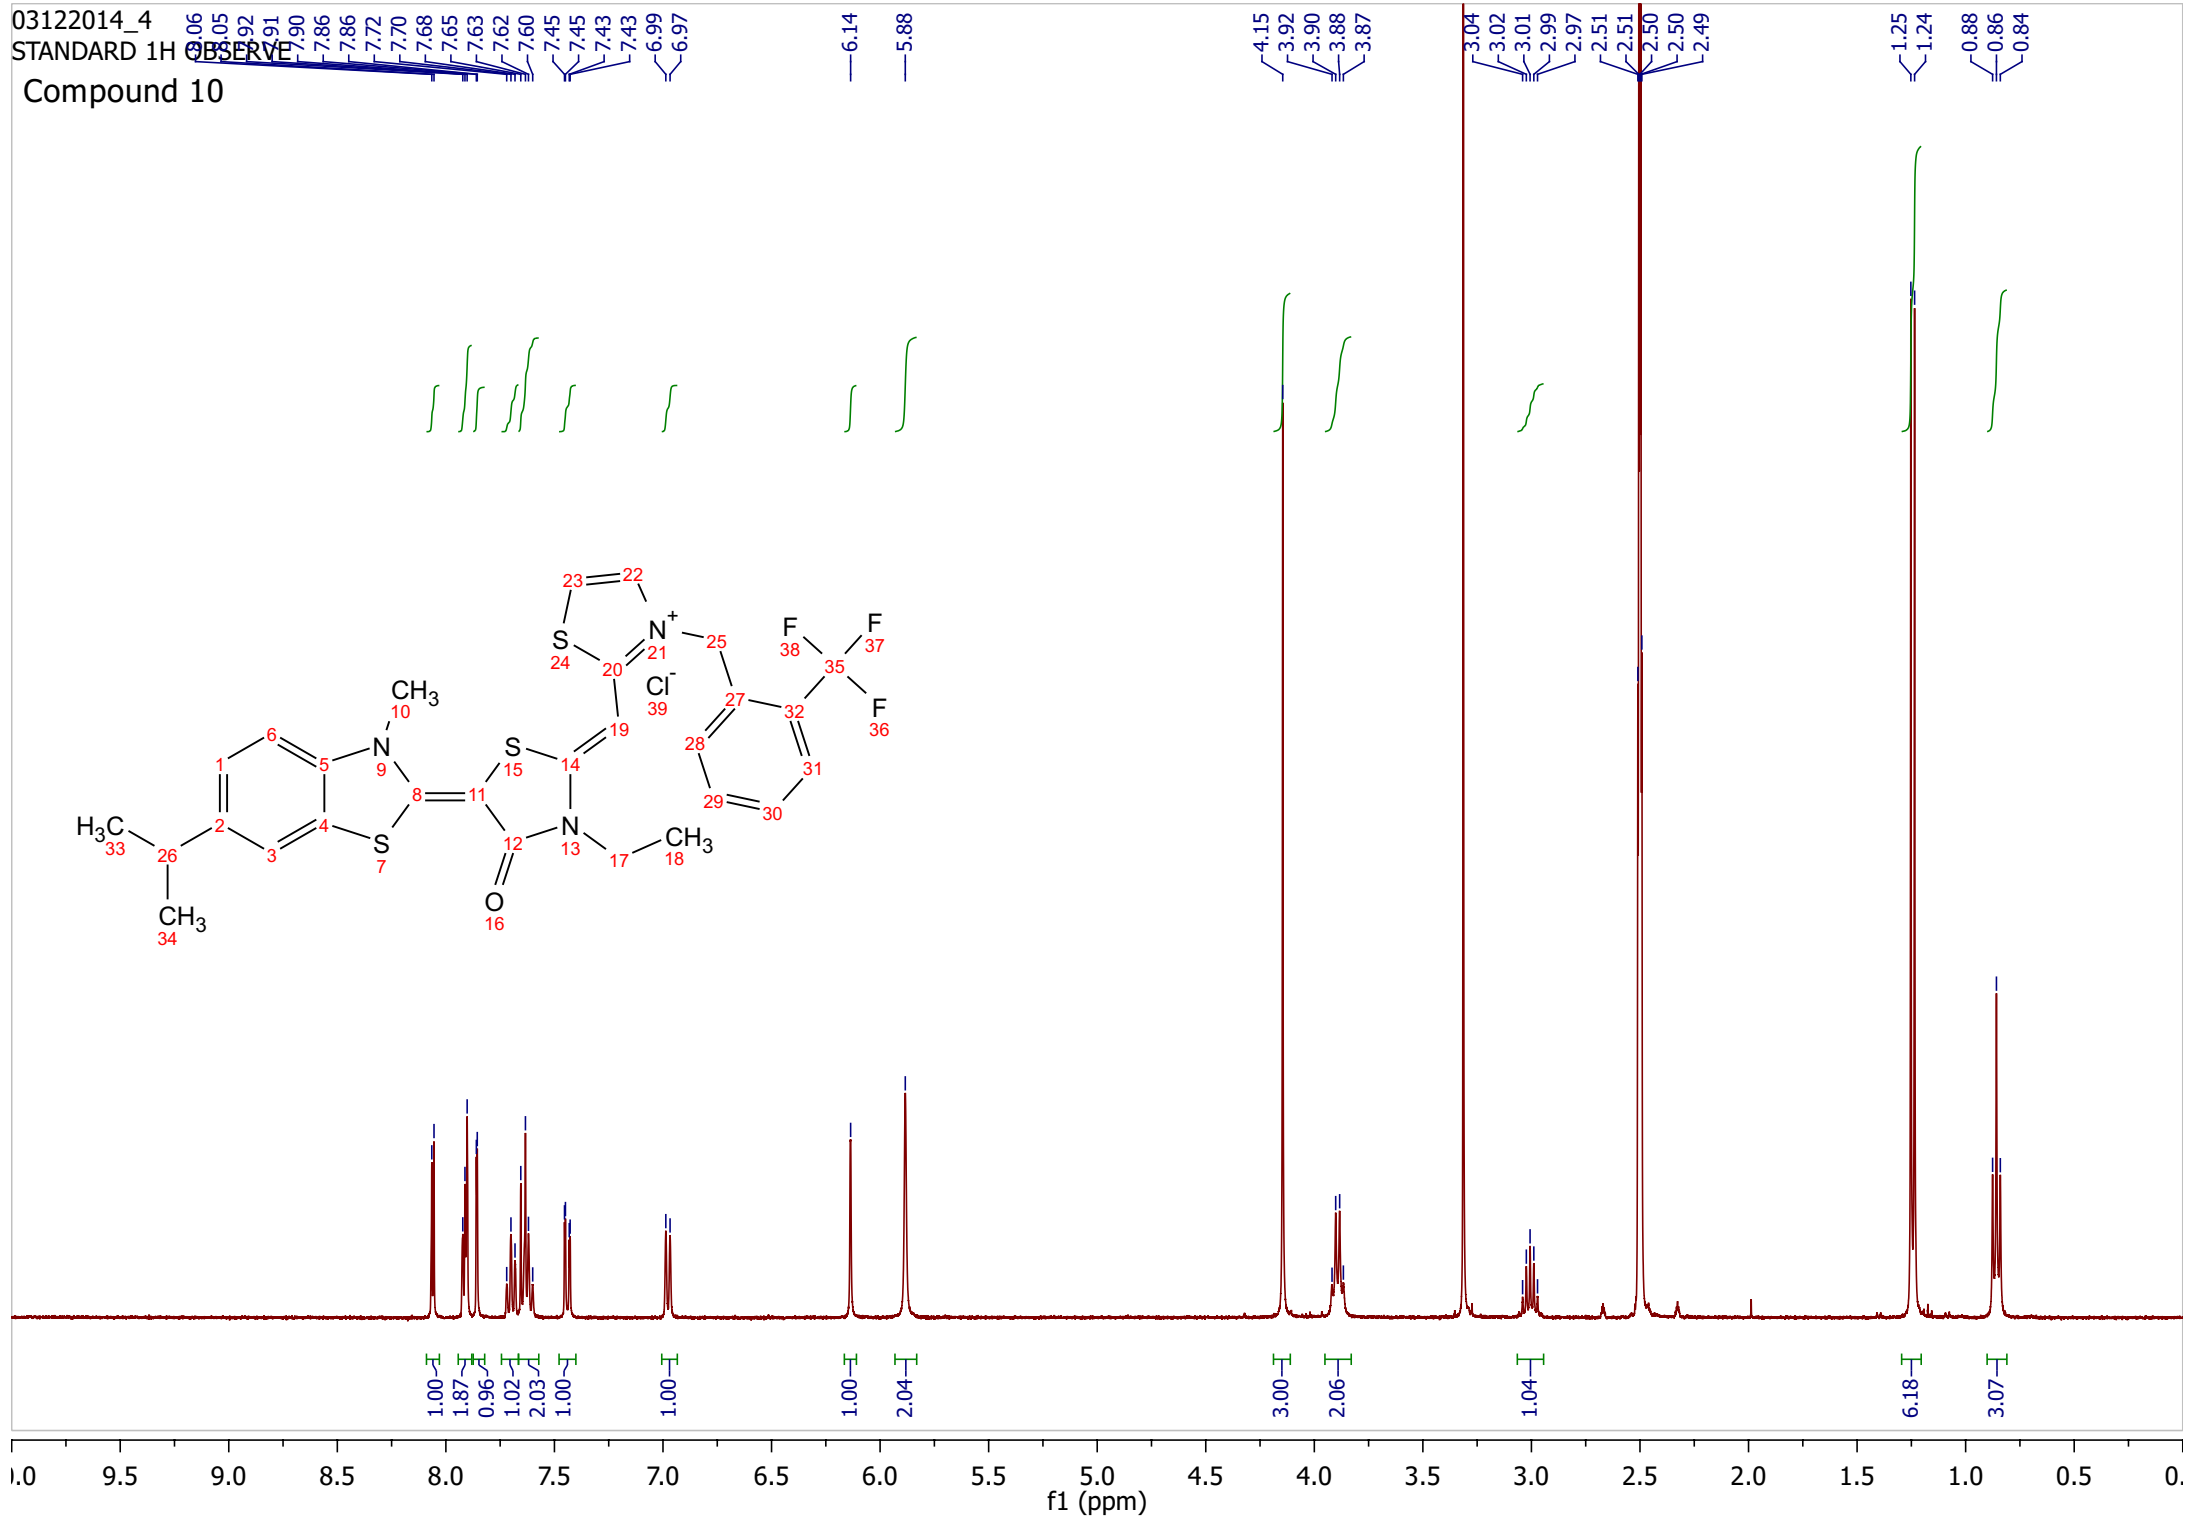

03032014\_3  
STANDARD 1H OBSERVE

Compound 11

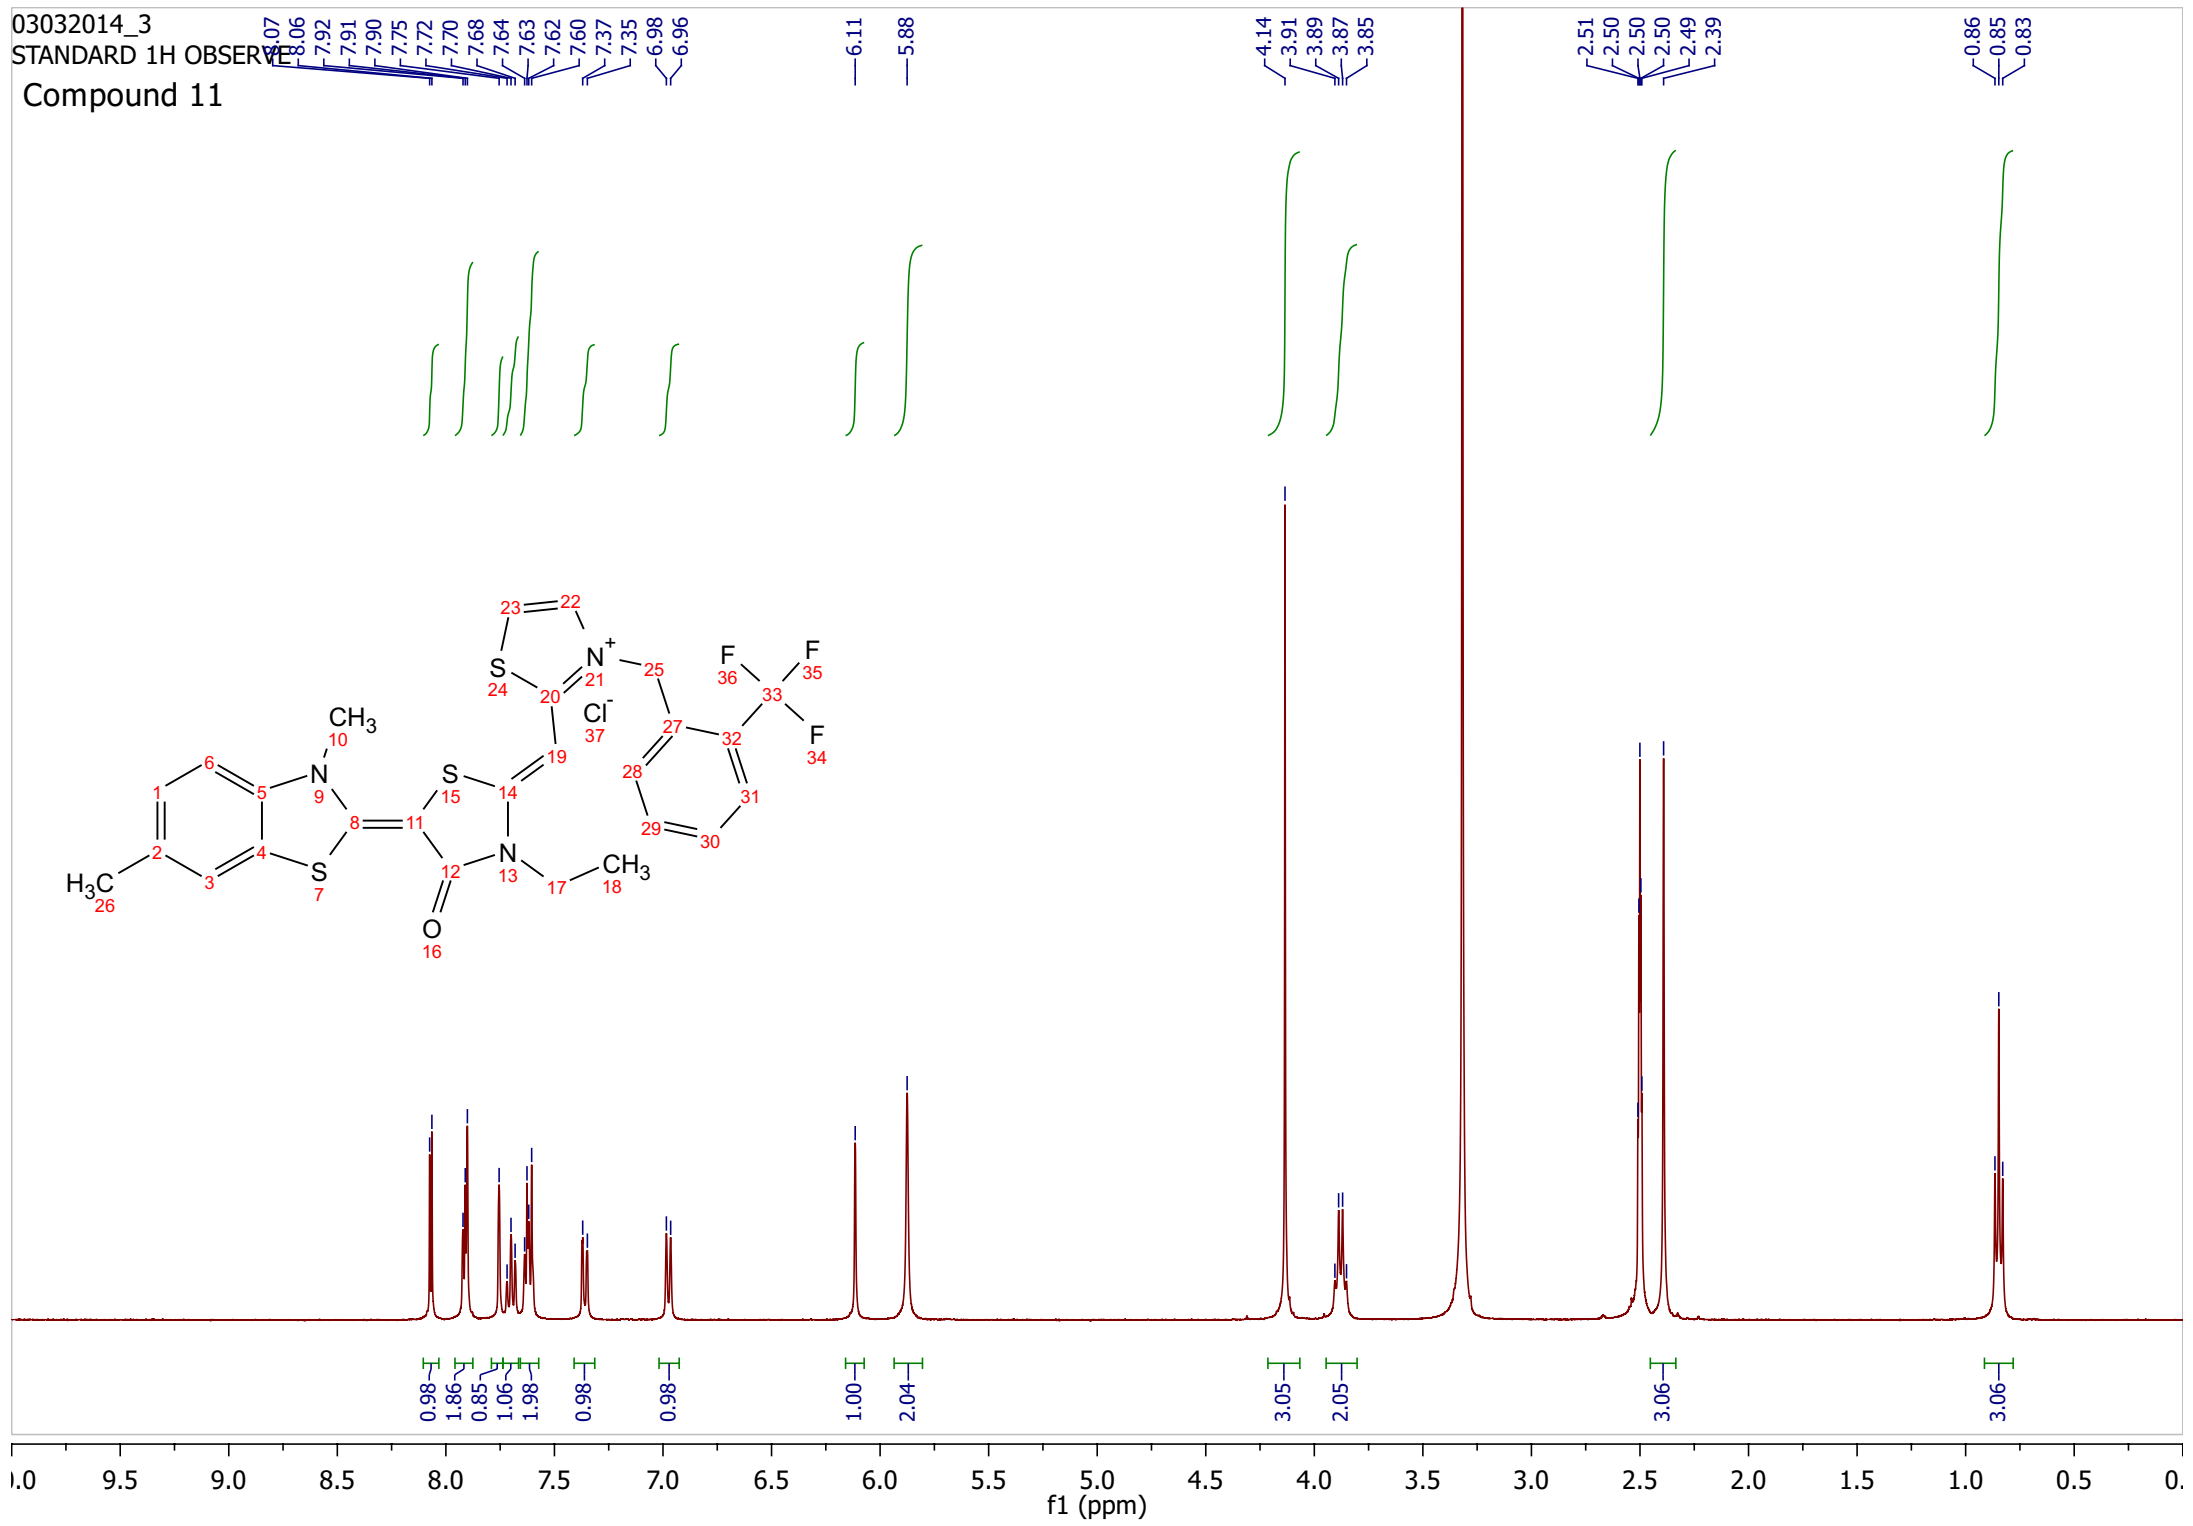

03042014\_3  
STANDARD 1H OBSERVE

Compound 12

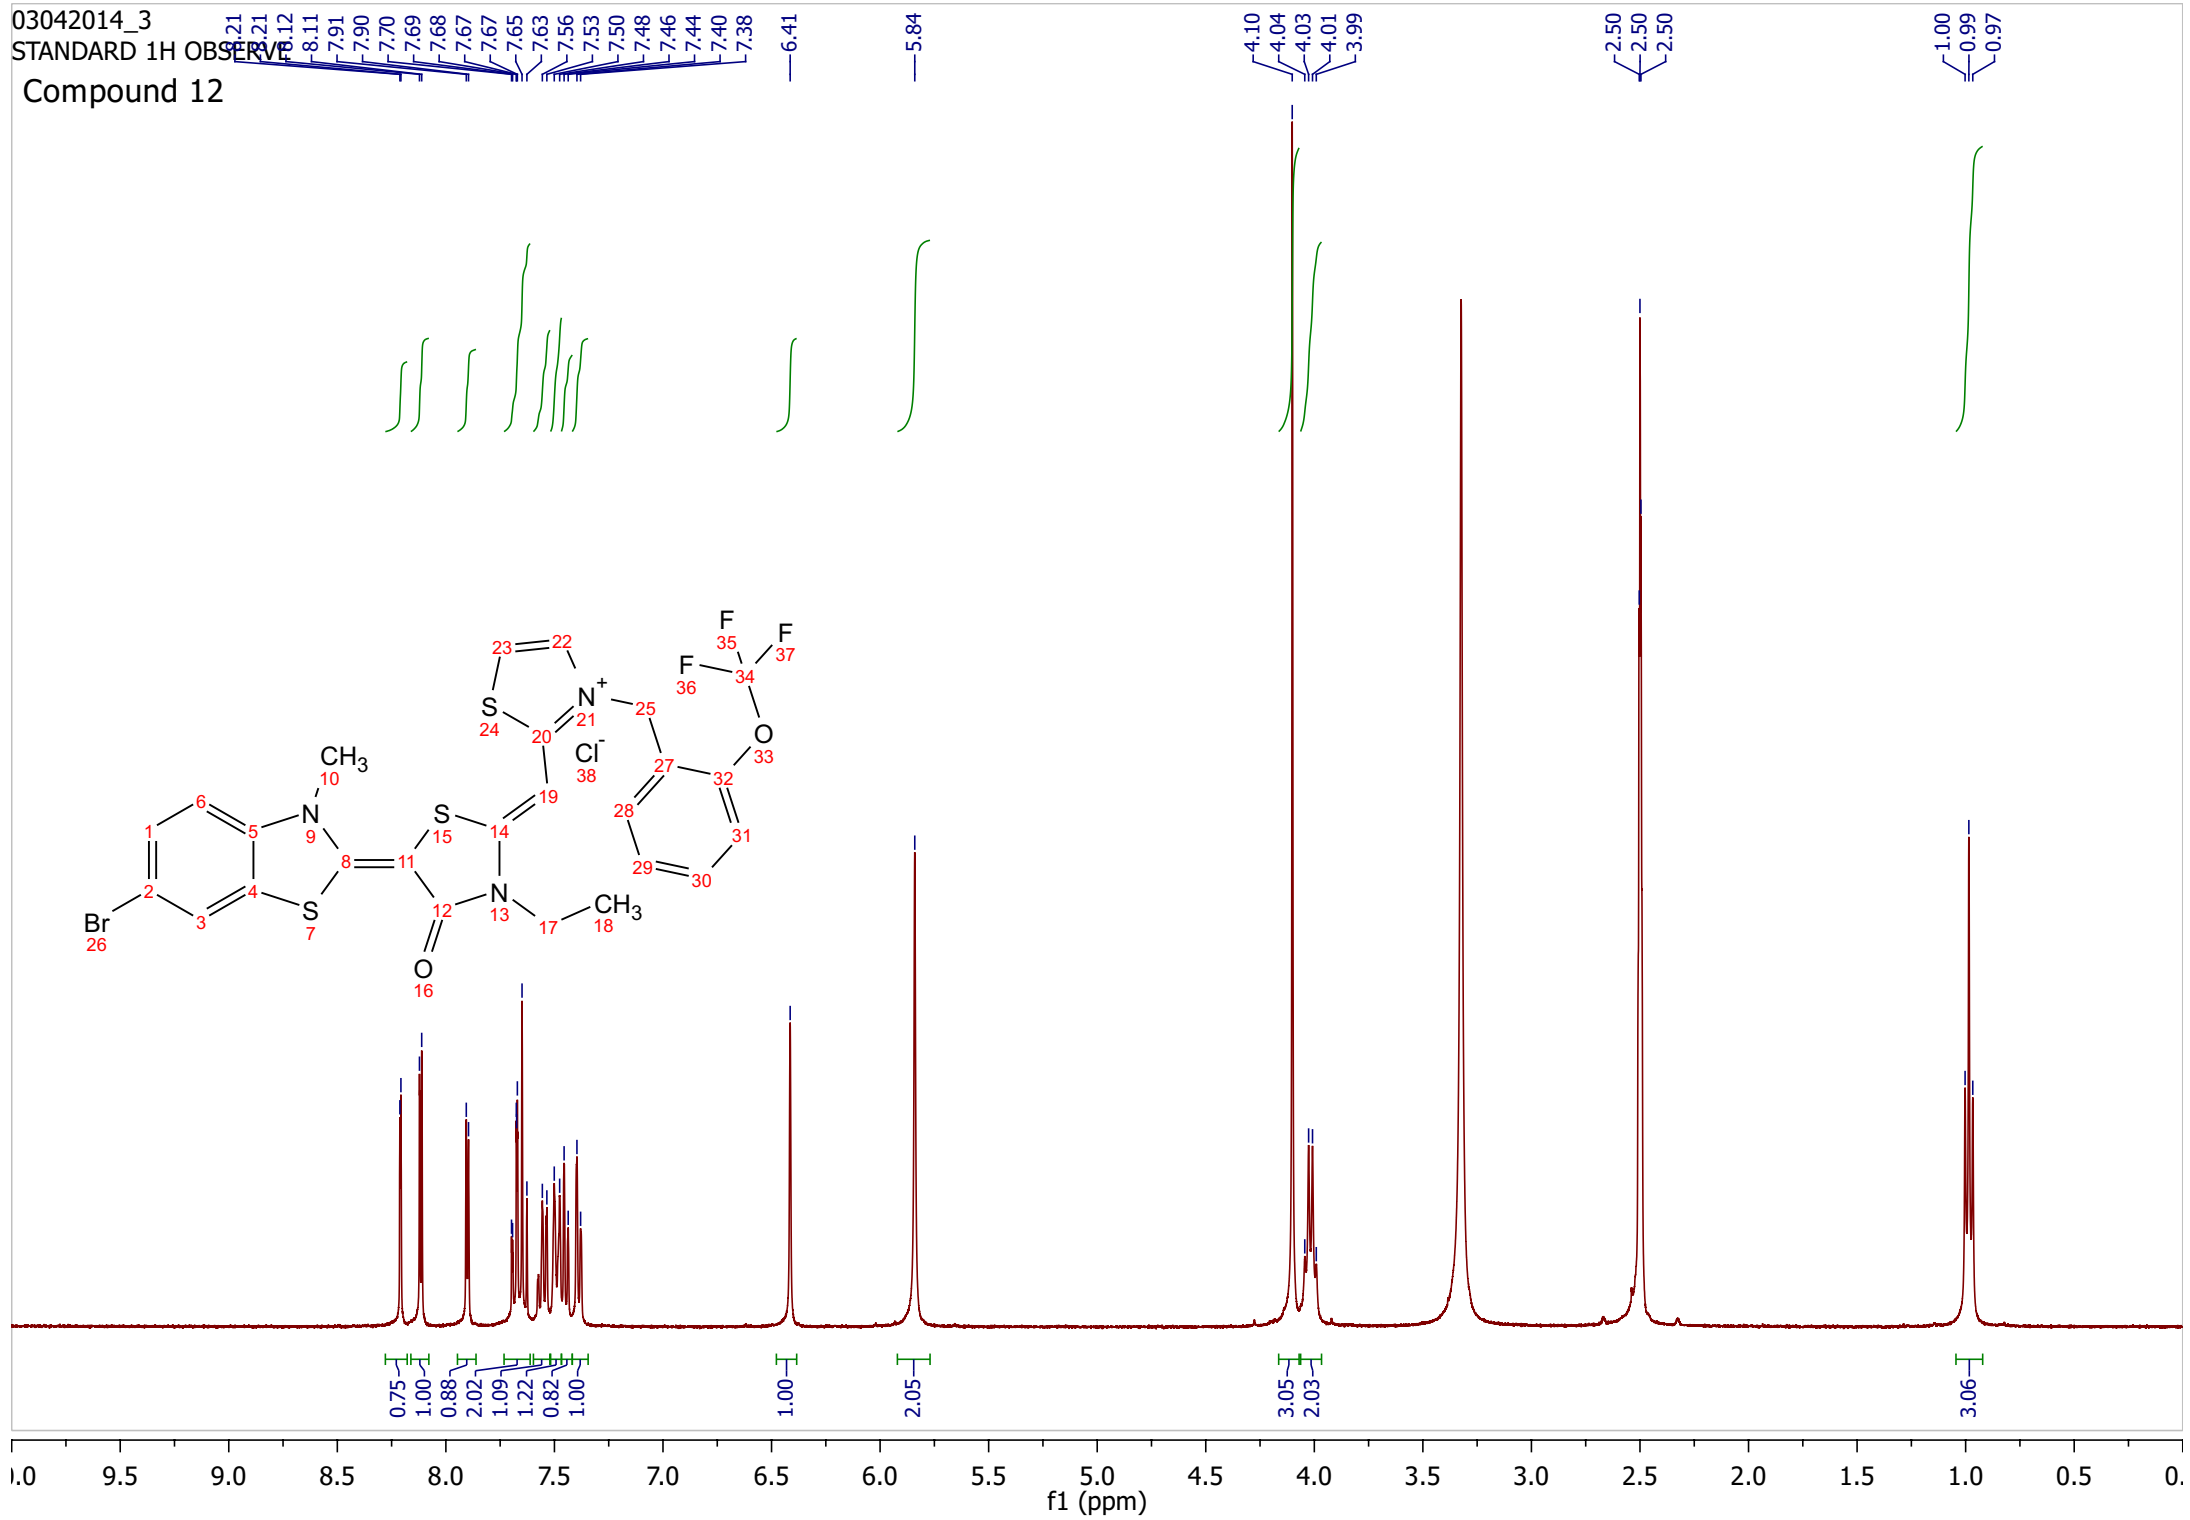



03042014\_4  
STANDARD 1H OBSERVE

Compound 13

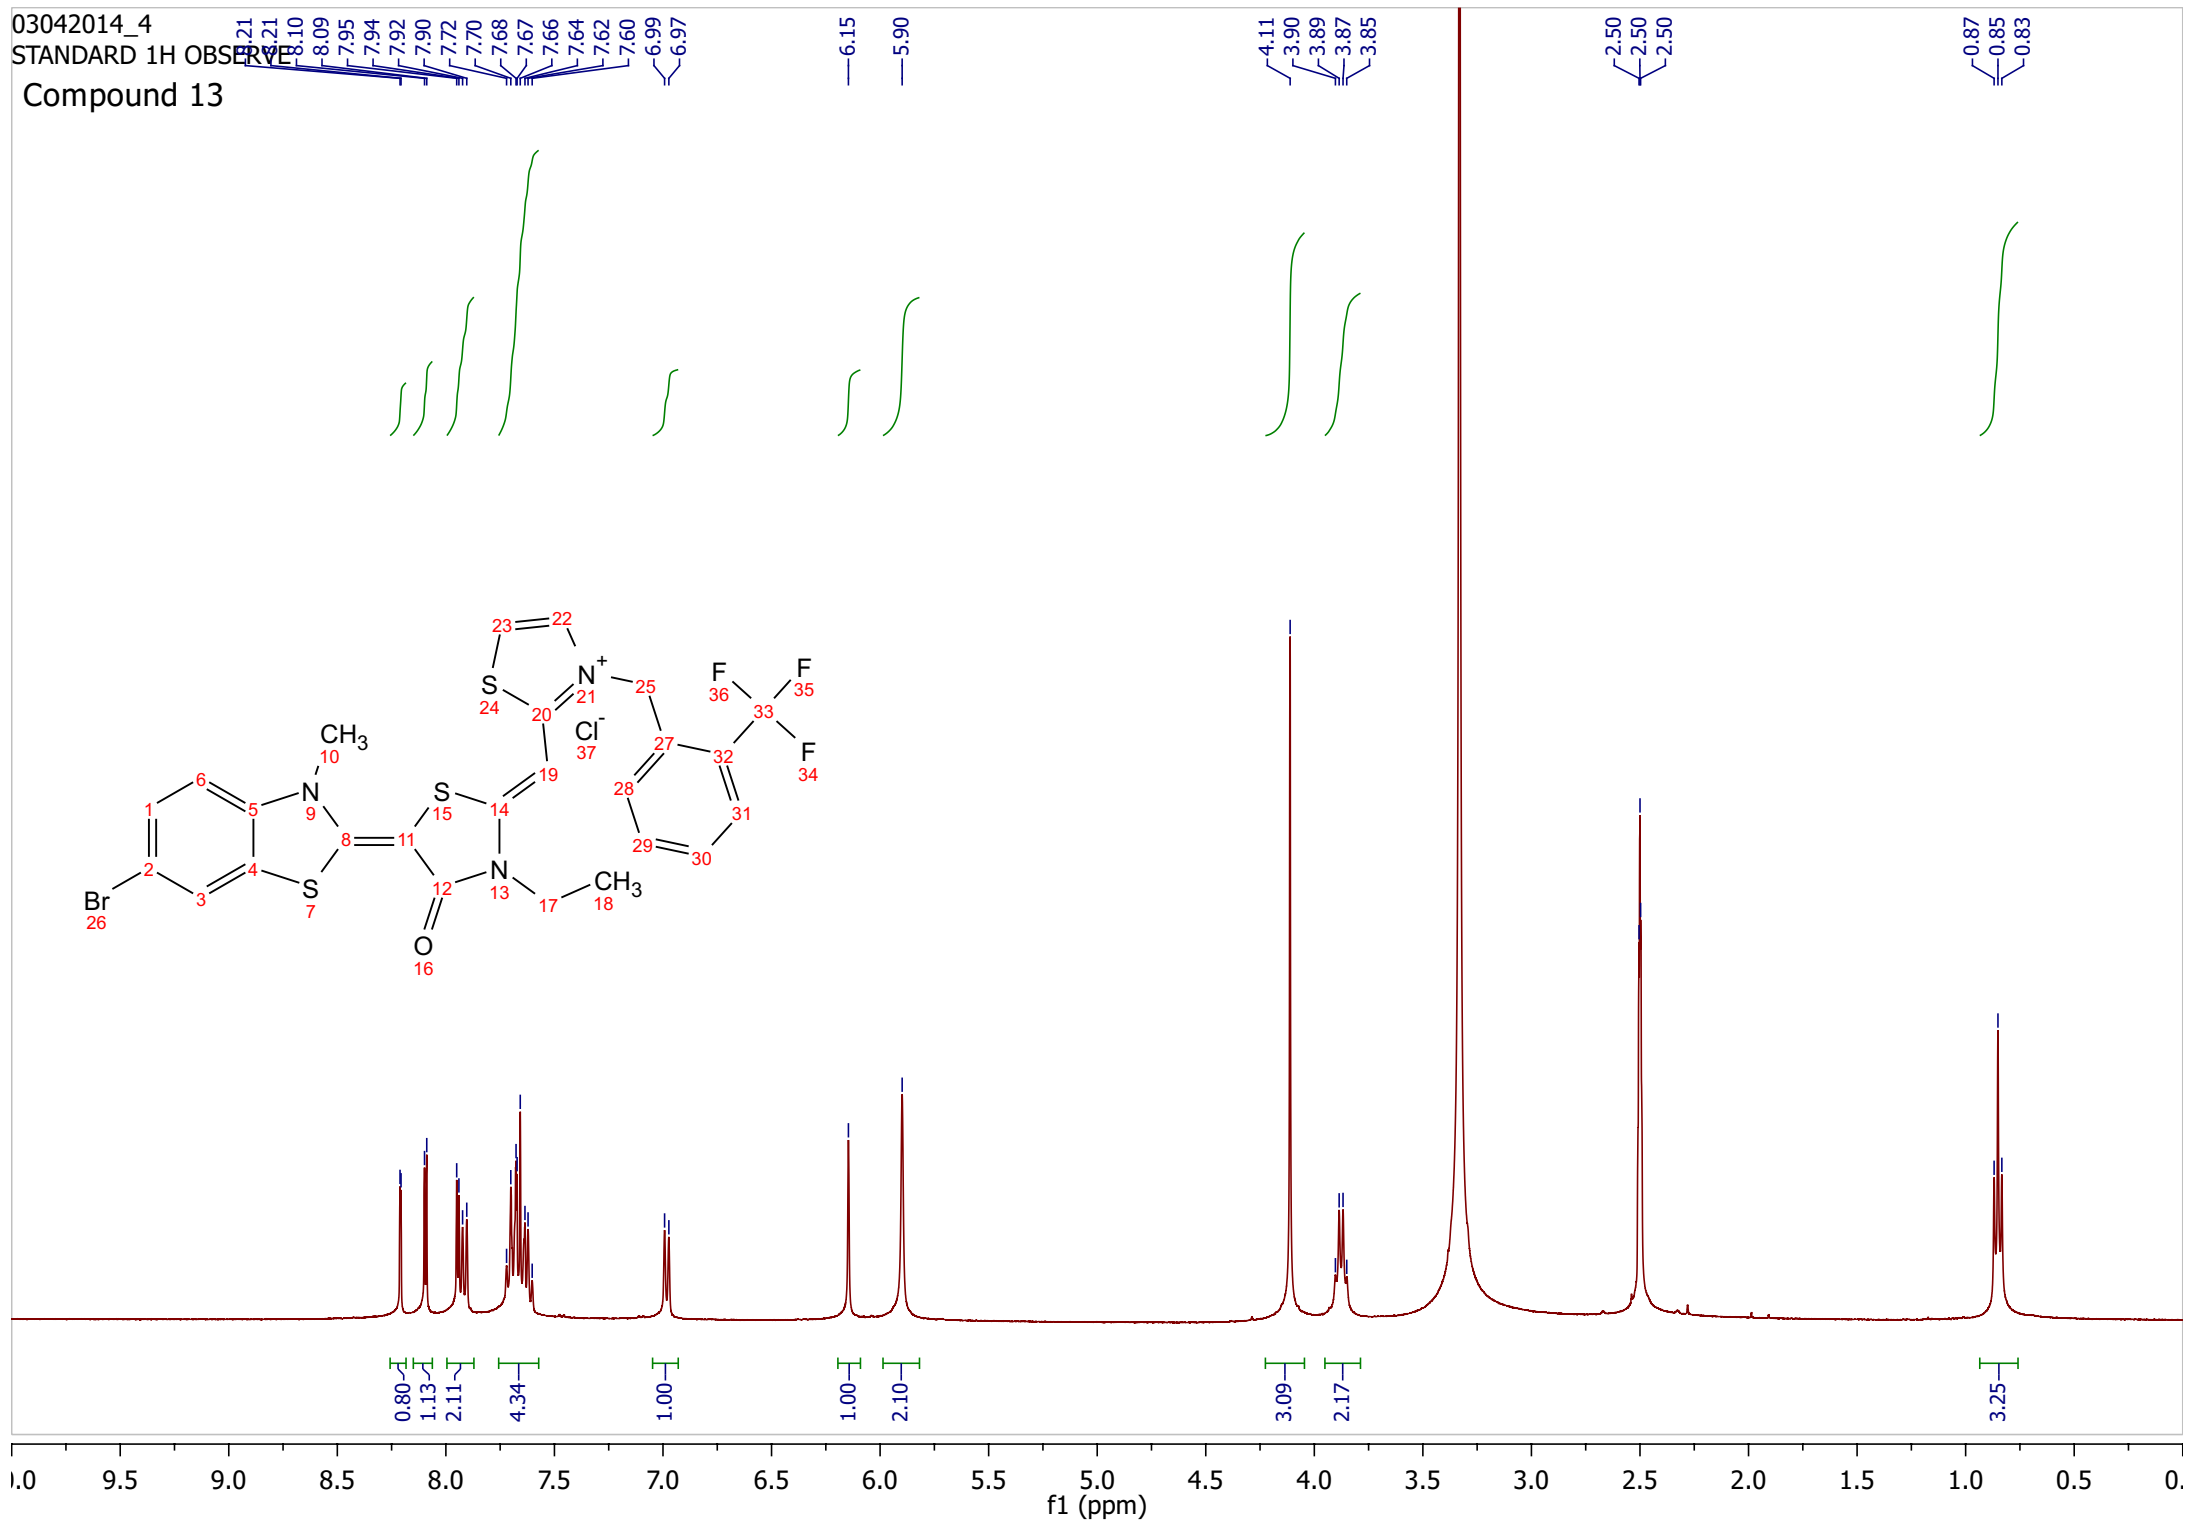



12122013\_2  
STANDARD 1H OBSERVE

Compound 15

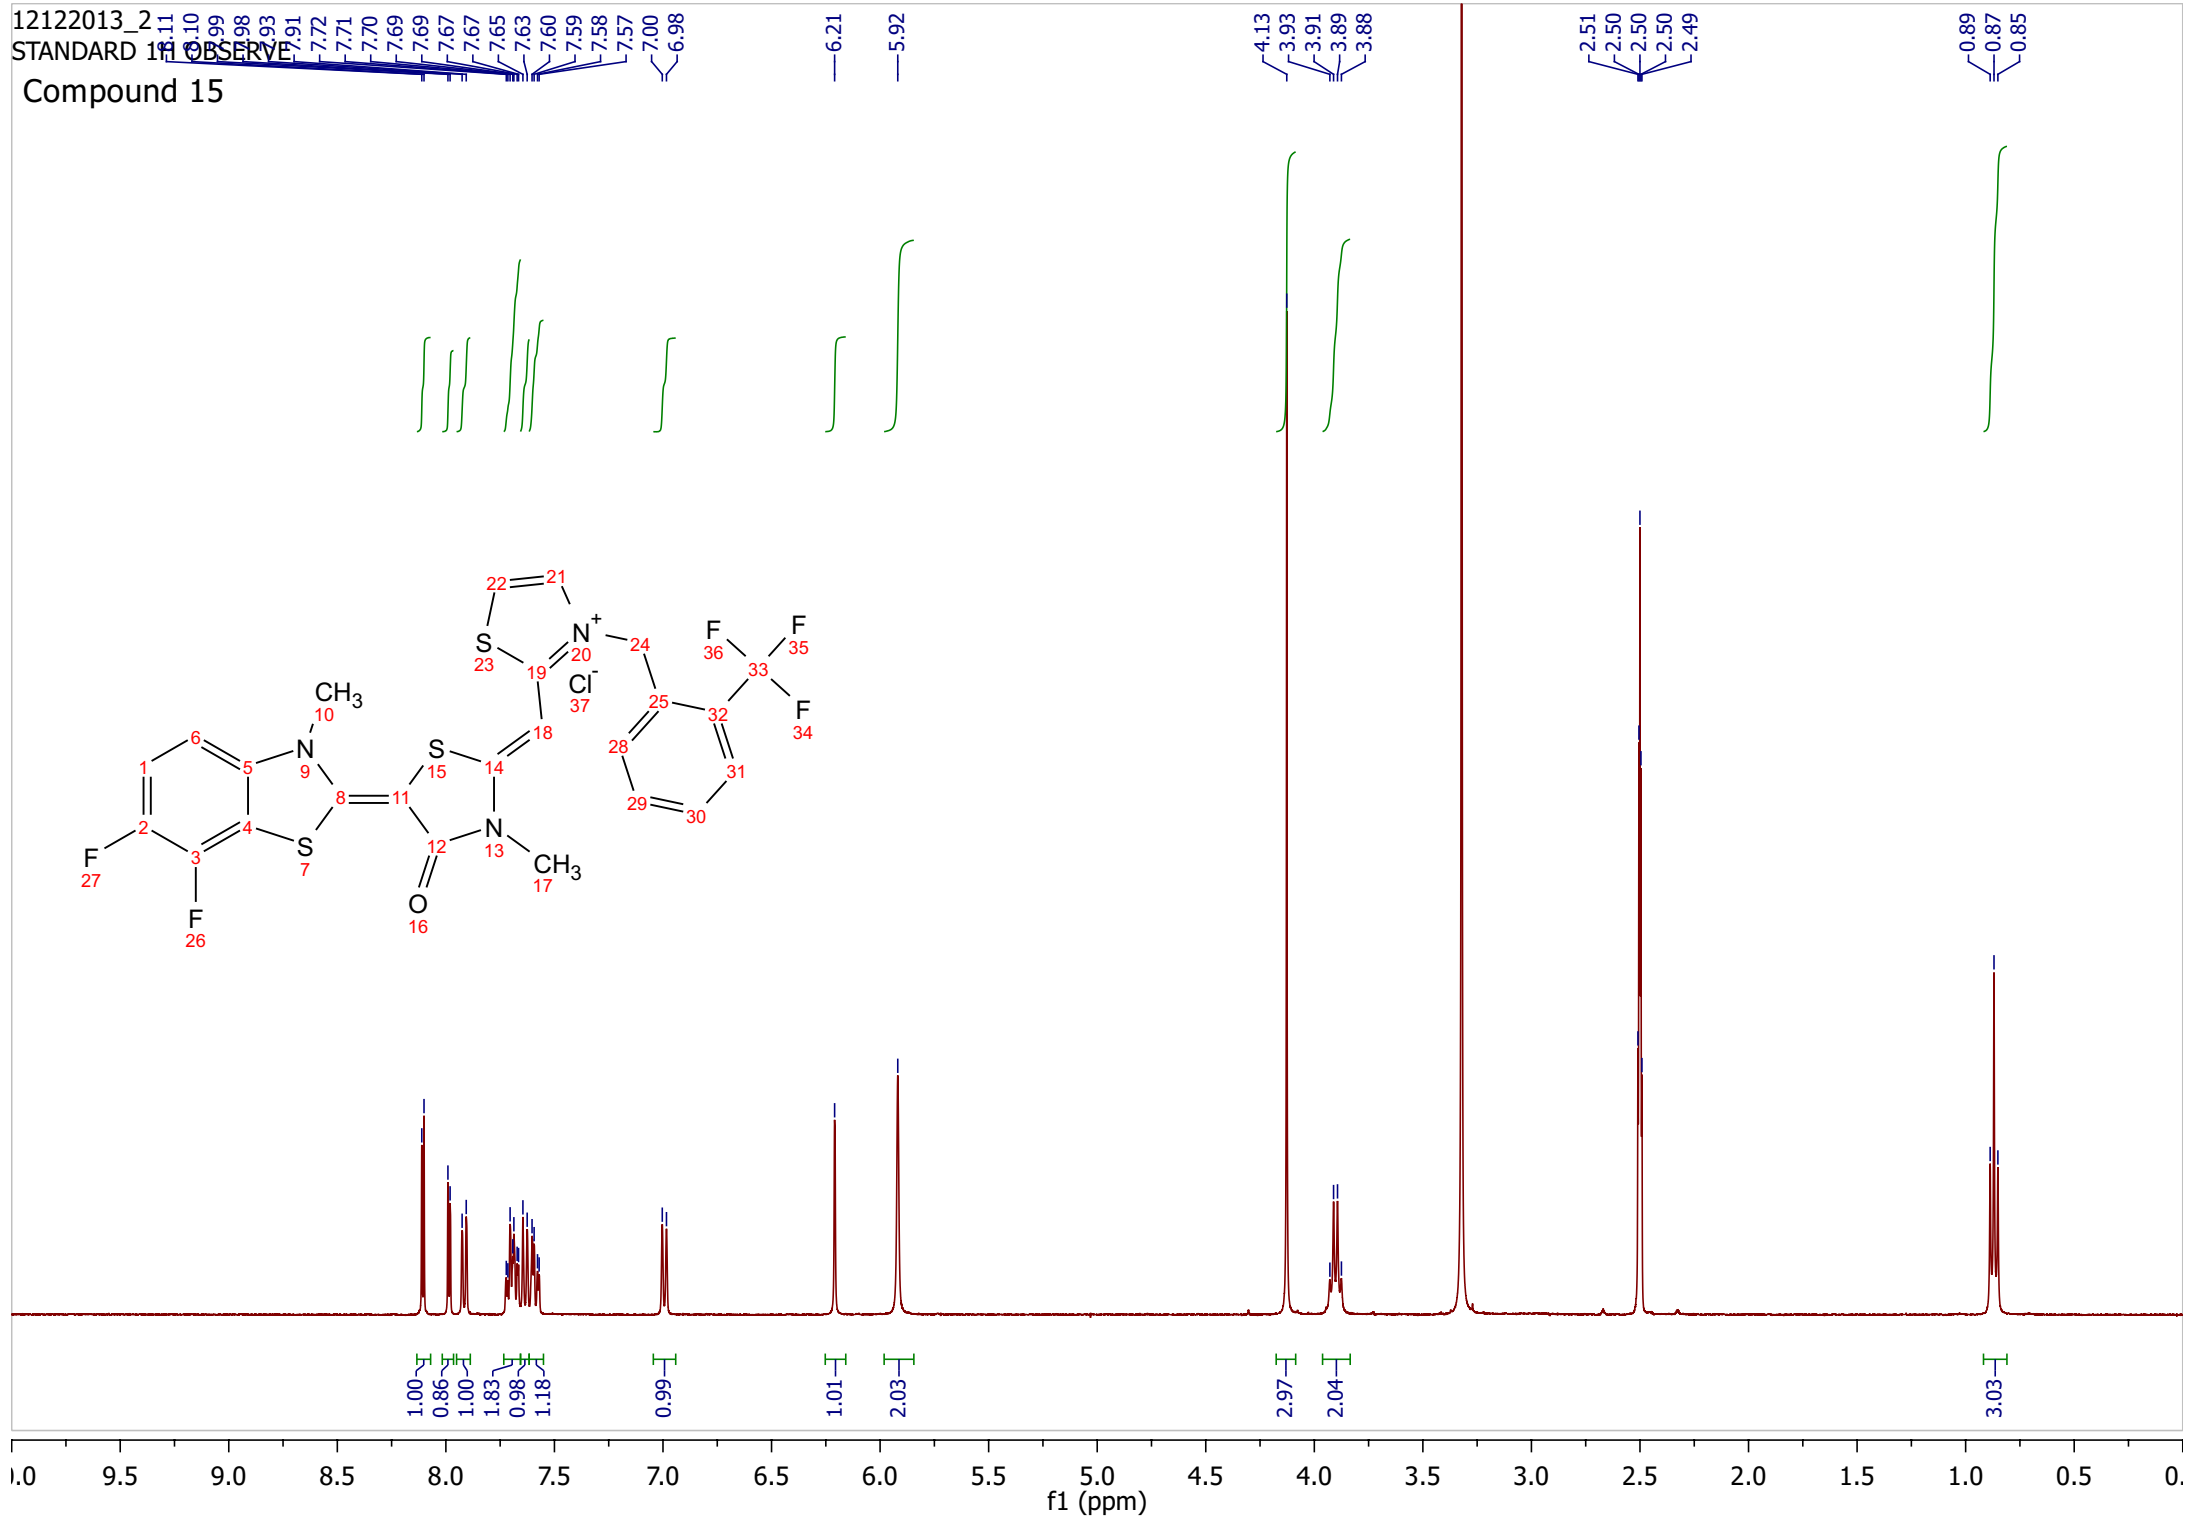

11062013\_1  
STANDARD 1H OBSERVE

Compound 16

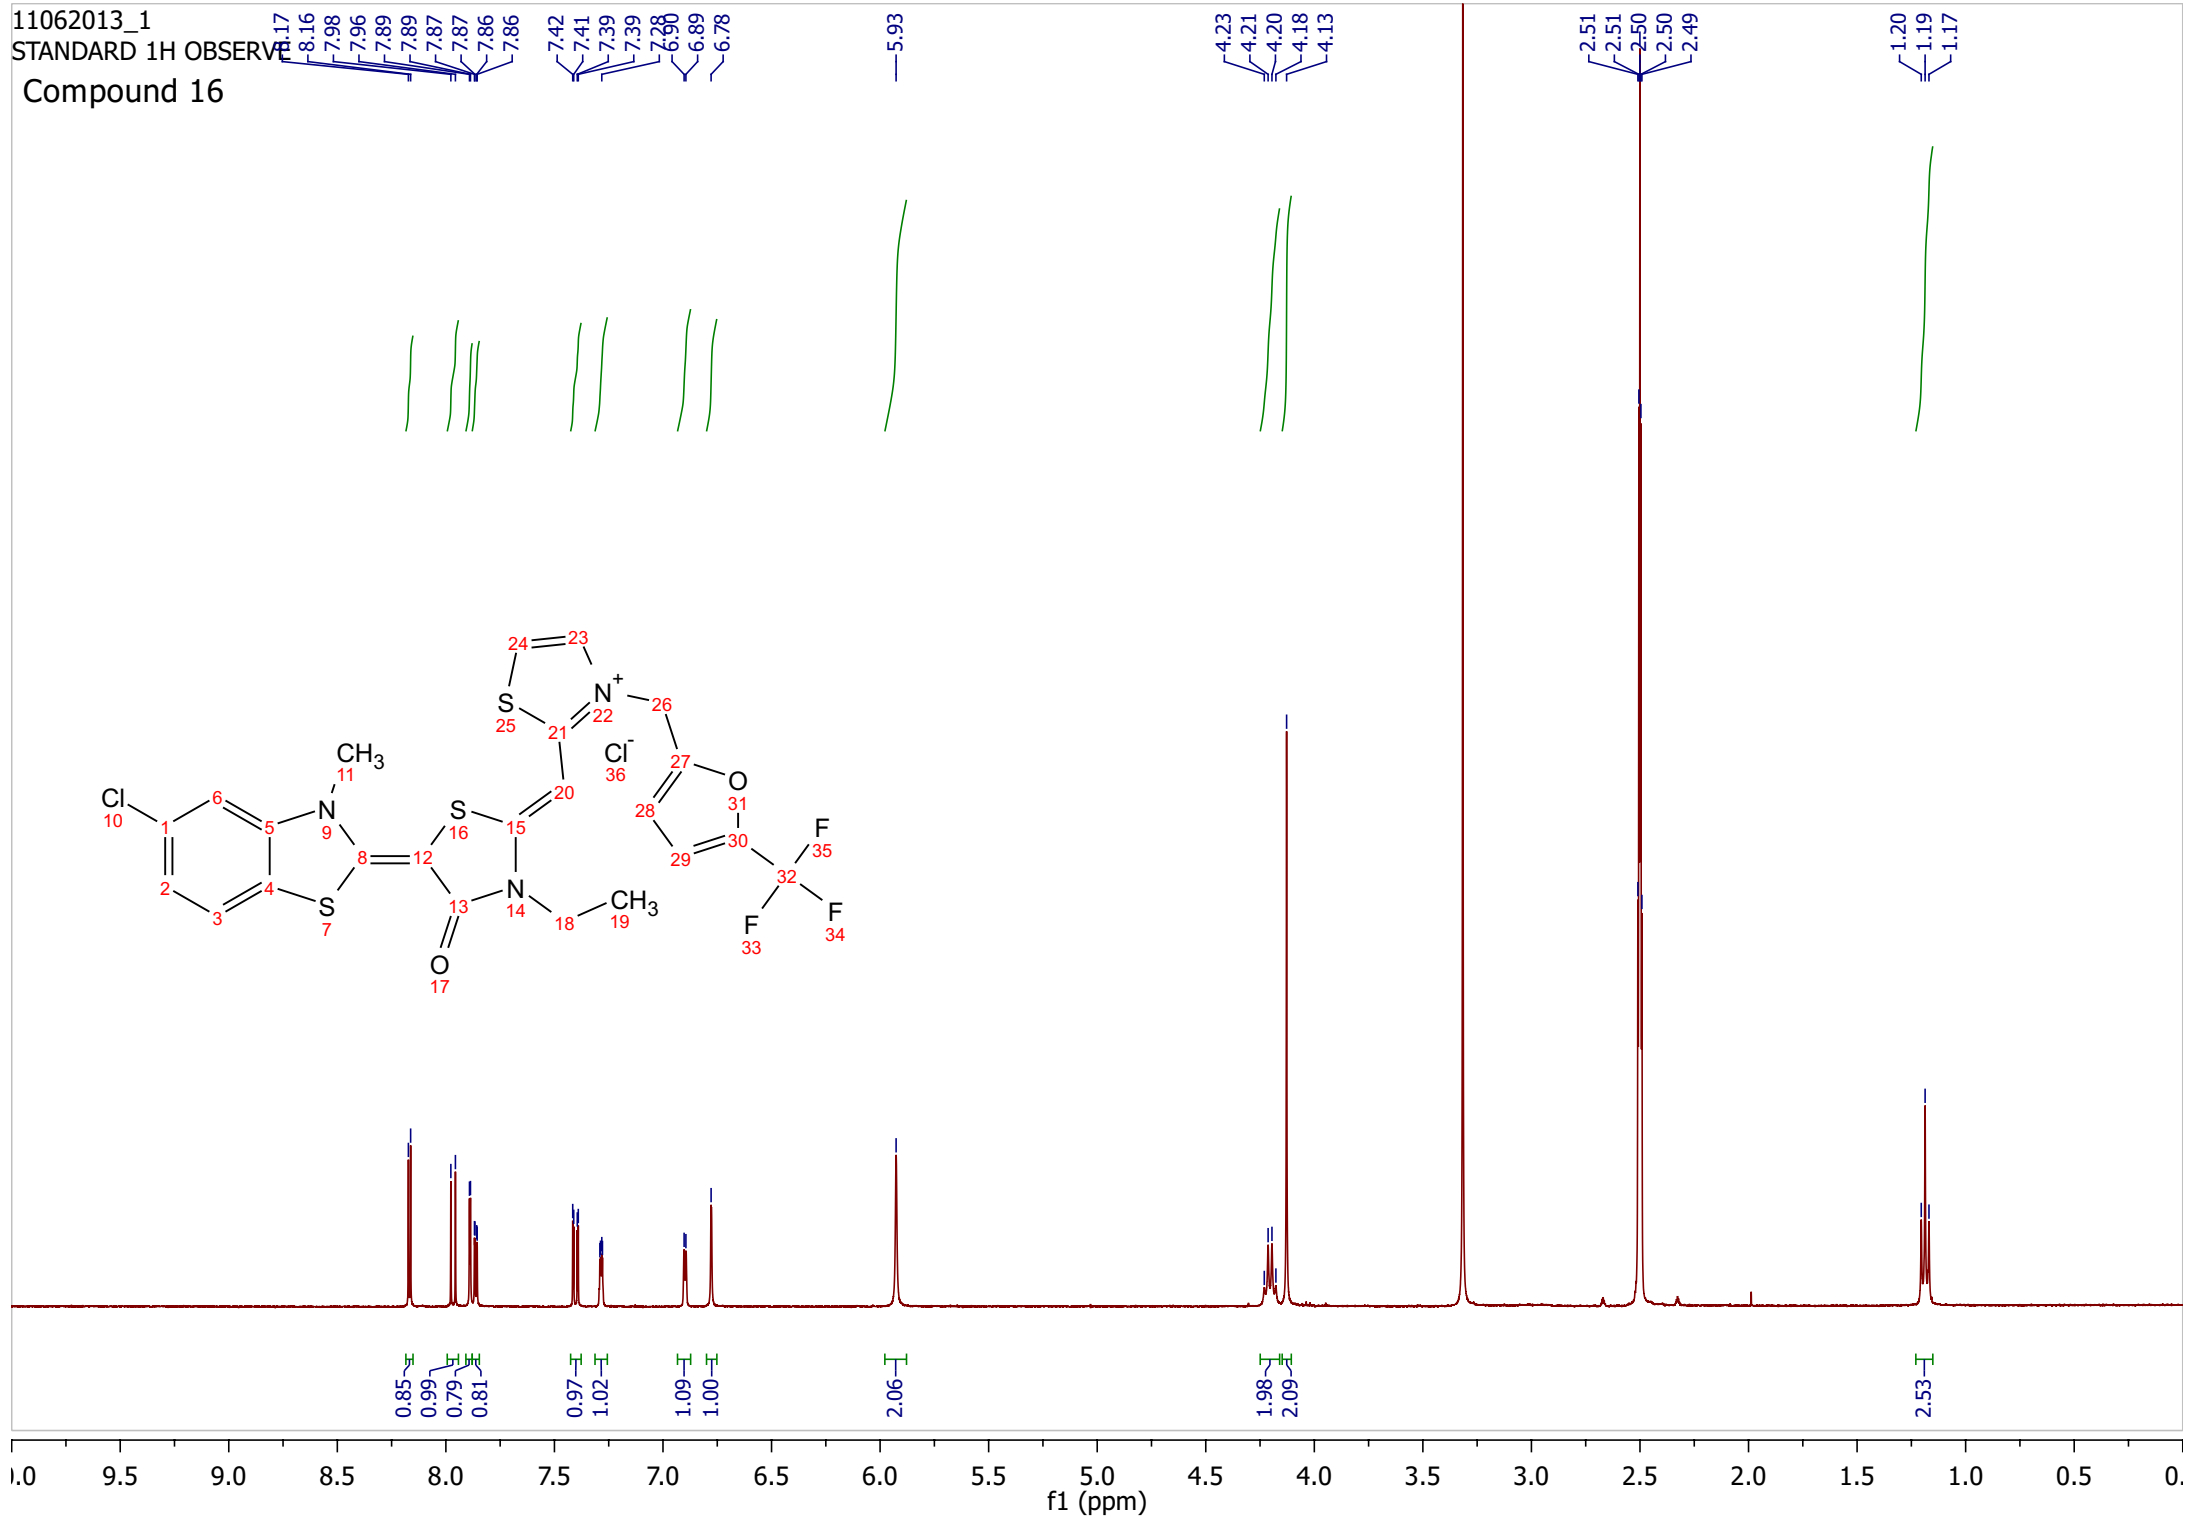

12132013\_1  
STANDARD 1H OBSERVE  
Compound 17

8.23  
8.22

7.92  
7.91

7.65  
7.58

7.29  
7.28

6.93  
6.83

5.98

4.24  
4.22

4.21  
4.19

3.32

2.50  
2.50

2.50  
2.50

1.99

1.21  
1.21

1.19  
1.19

1.17  
1.17

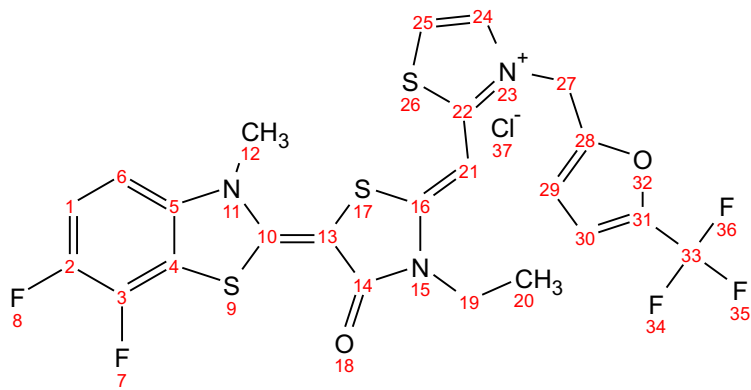

1.00

0.87

1.01

0.98

0.86

0.95

1.00

2.05

2.10

3.03

3.18

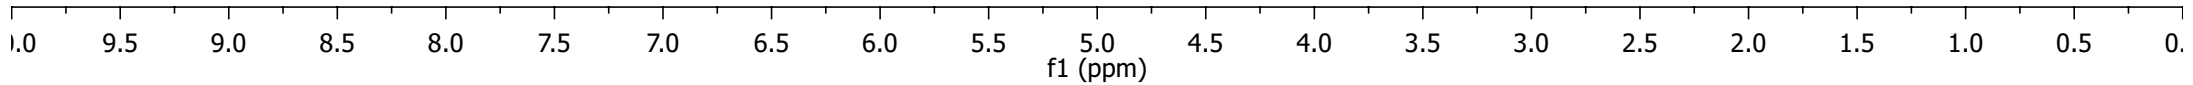

03122014\_6  
STANDARD 1H OBSERVE  
Compound 18

8.17  
8.17  
8.16  
8.16

7.85  
7.85

7.84  
7.83

7.64  
7.62  
7.44

6.92  
6.91  
6.77

5.93

4.24  
4.22

4.20  
4.18  
4.13

3.04  
3.02

3.00  
2.99

2.97  
2.51  
2.50  
2.50  
2.50  
2.49

1.25  
1.24  
1.20

1.19  
1.17

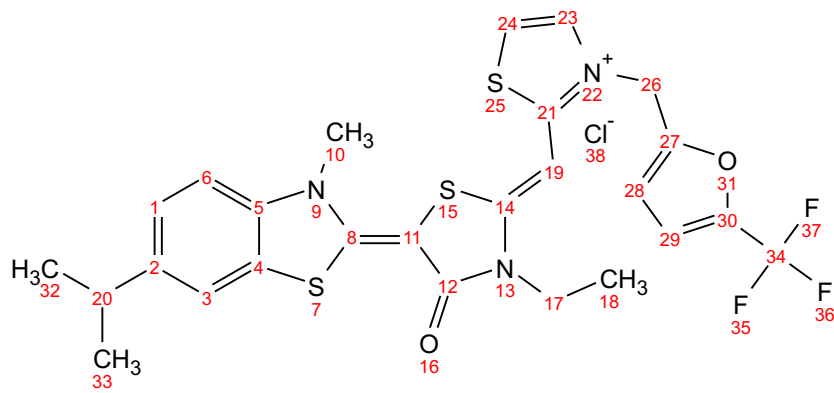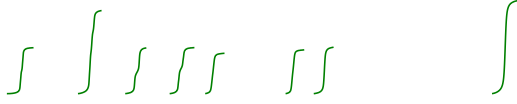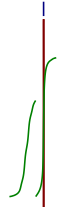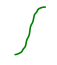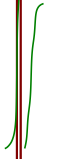

0.99

1.79

0.98

0.99

0.87

0.94

1.00

2.01

2.07

2.99

1.03

6.14

3.12



03052014\_6  
STANDARD 1H OBSERVE  
Compound 19

8.15  
8.14  
8.14

7.83  
7.82  
7.81  
7.64  
7.62  
7.29  
7.28  
6.90  
6.75

5.91

4.23  
4.23  
4.21  
4.21  
4.20  
4.20  
4.18  
4.18  
4.14  
4.14

3.31

2.69  
2.69  
2.51  
2.51  
2.50  
2.50  
2.50  
2.50  
2.49  
2.49  
2.49  
1.24  
1.24  
1.22  
1.22  
1.21  
1.21  
1.20  
1.20  
1.19  
1.19  
1.17  
1.17

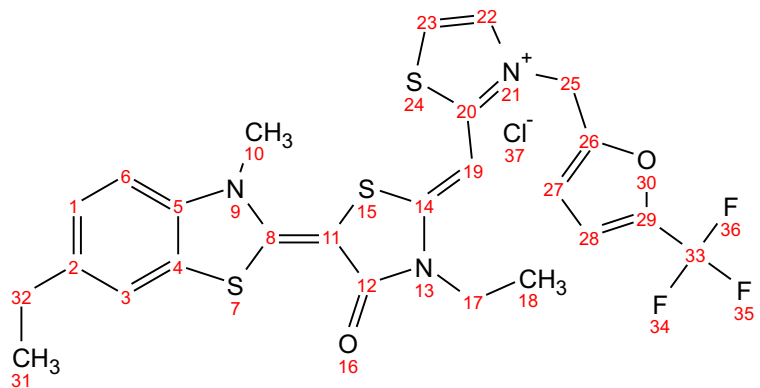

0.99

0.87

0.89

0.99

0.98

0.88

0.95

1.00

2.05

2.14

3.03

2.20

3.01

3.05

1.0 9.5 9.0 8.5 8.0 7.5 7.0 6.5 6.0 5.5 5.0 4.5 4.0 3.5 3.0 2.5 2.0 1.5 1.0 0.5 0.0  
f1 (ppm)

03102014\_3  
STANDARD 1H OBSERVE  
JG-319

8.32  
8.30  
7.91  
7.90  
7.84  
7.63  
7.61  
7.45  
7.43  
7.41  
7.41  
7.39  
7.37  
7.35  
6.29  
6.28  
6.26

4.12  
4.04  
4.02  
3.50  
3.32  
3.03  
3.01  
3.00  
2.98  
2.96  
2.50  
2.50  
1.99  
1.96  
1.94  
1.25  
1.23  
1.19  
1.17  
1.15  
1.04  
1.02  
1.01

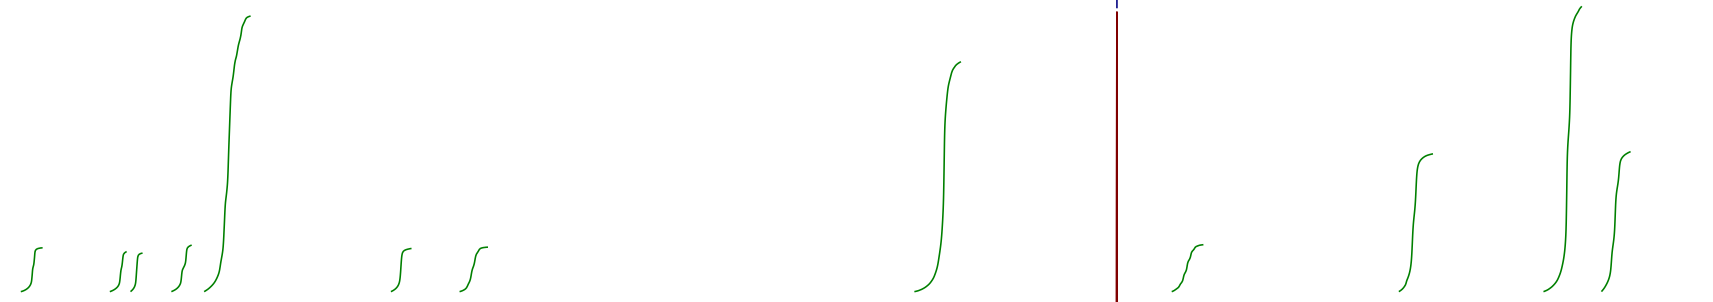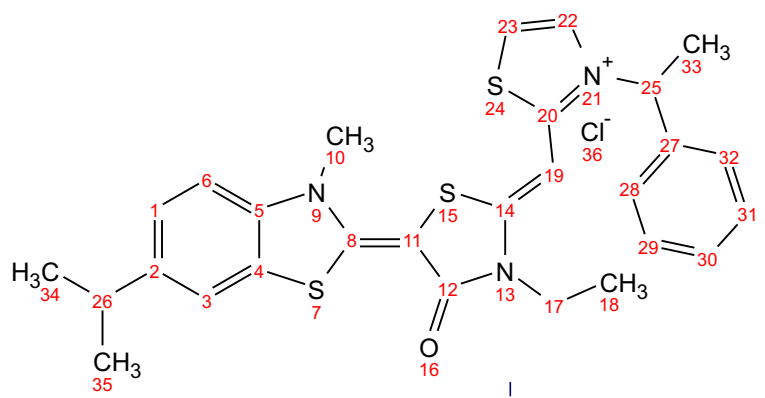

1.02  
0.93  
0.89  
1.08  
6.38  
1.00  
1.03  
5.32  
1.09  
3.19  
6.60  
3.24

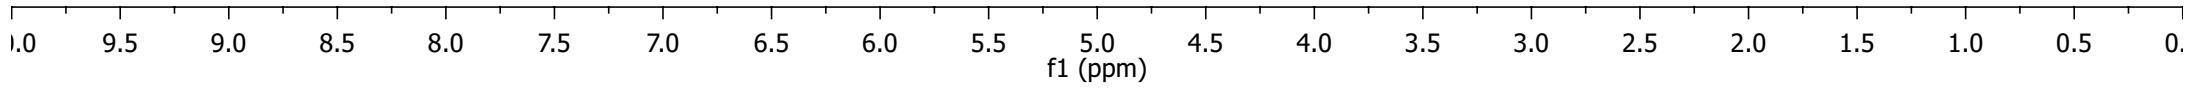



03102014\_4  
STANDARD 1H OBSERVE  
JG-320

8.31 8.30 7.91 7.78 7.78 7.62 7.60 7.43 7.41 7.41 7.40 7.39 7.39 6.61 6.30 6.29 6.27 6.25 4.11 4.10 4.08 2.72 2.70 2.68 2.66 2.51 2.51 2.50 2.50 2.49 1.96 1.94 1.23 1.21 1.19 1.04 1.02 1.01

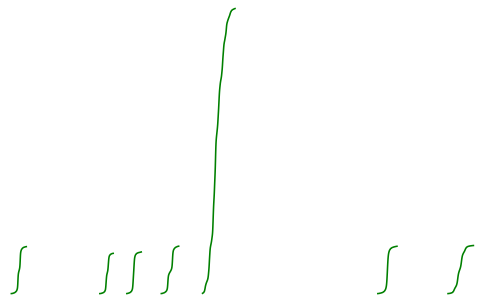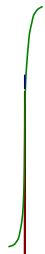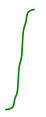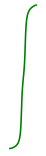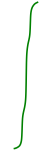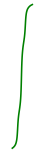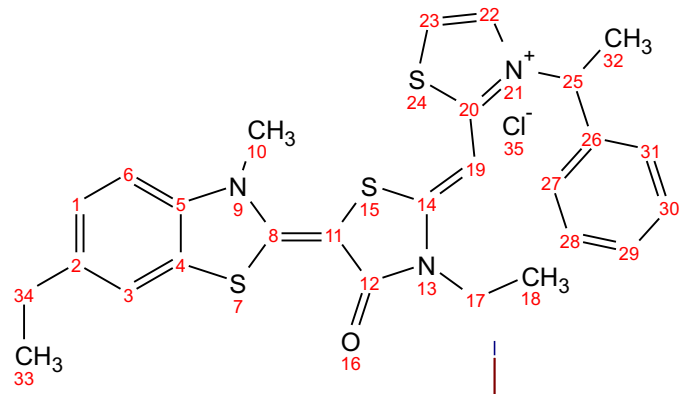

0.99

0.85

0.88

1.00

6.01

1.00

1.02

5.05

2.11

3.03

3.09

3.04



03112014\_1  
STANDARD 1H OBSERVE  
Compound 22

8.34  
8.32  
8.19  
8.18  
7.94  
7.93  
7.66  
7.65  
7.63  
7.43  
7.41  
7.41  
7.40  
7.39  
7.25  
6.32  
6.31  
6.29  
6.27

4.11  
4.08  
2.51  
2.50  
2.50  
2.50  
1.96  
1.95  
1.04  
1.02  
1.00

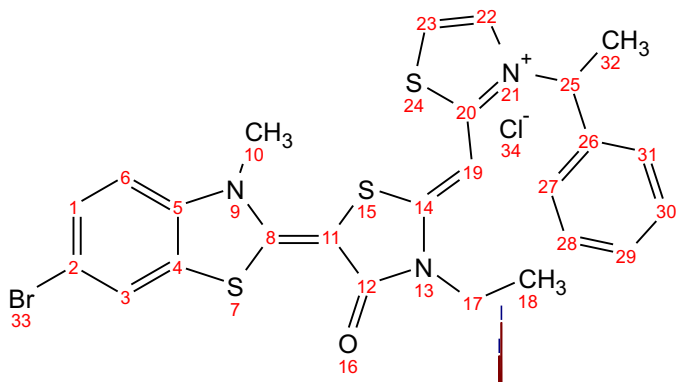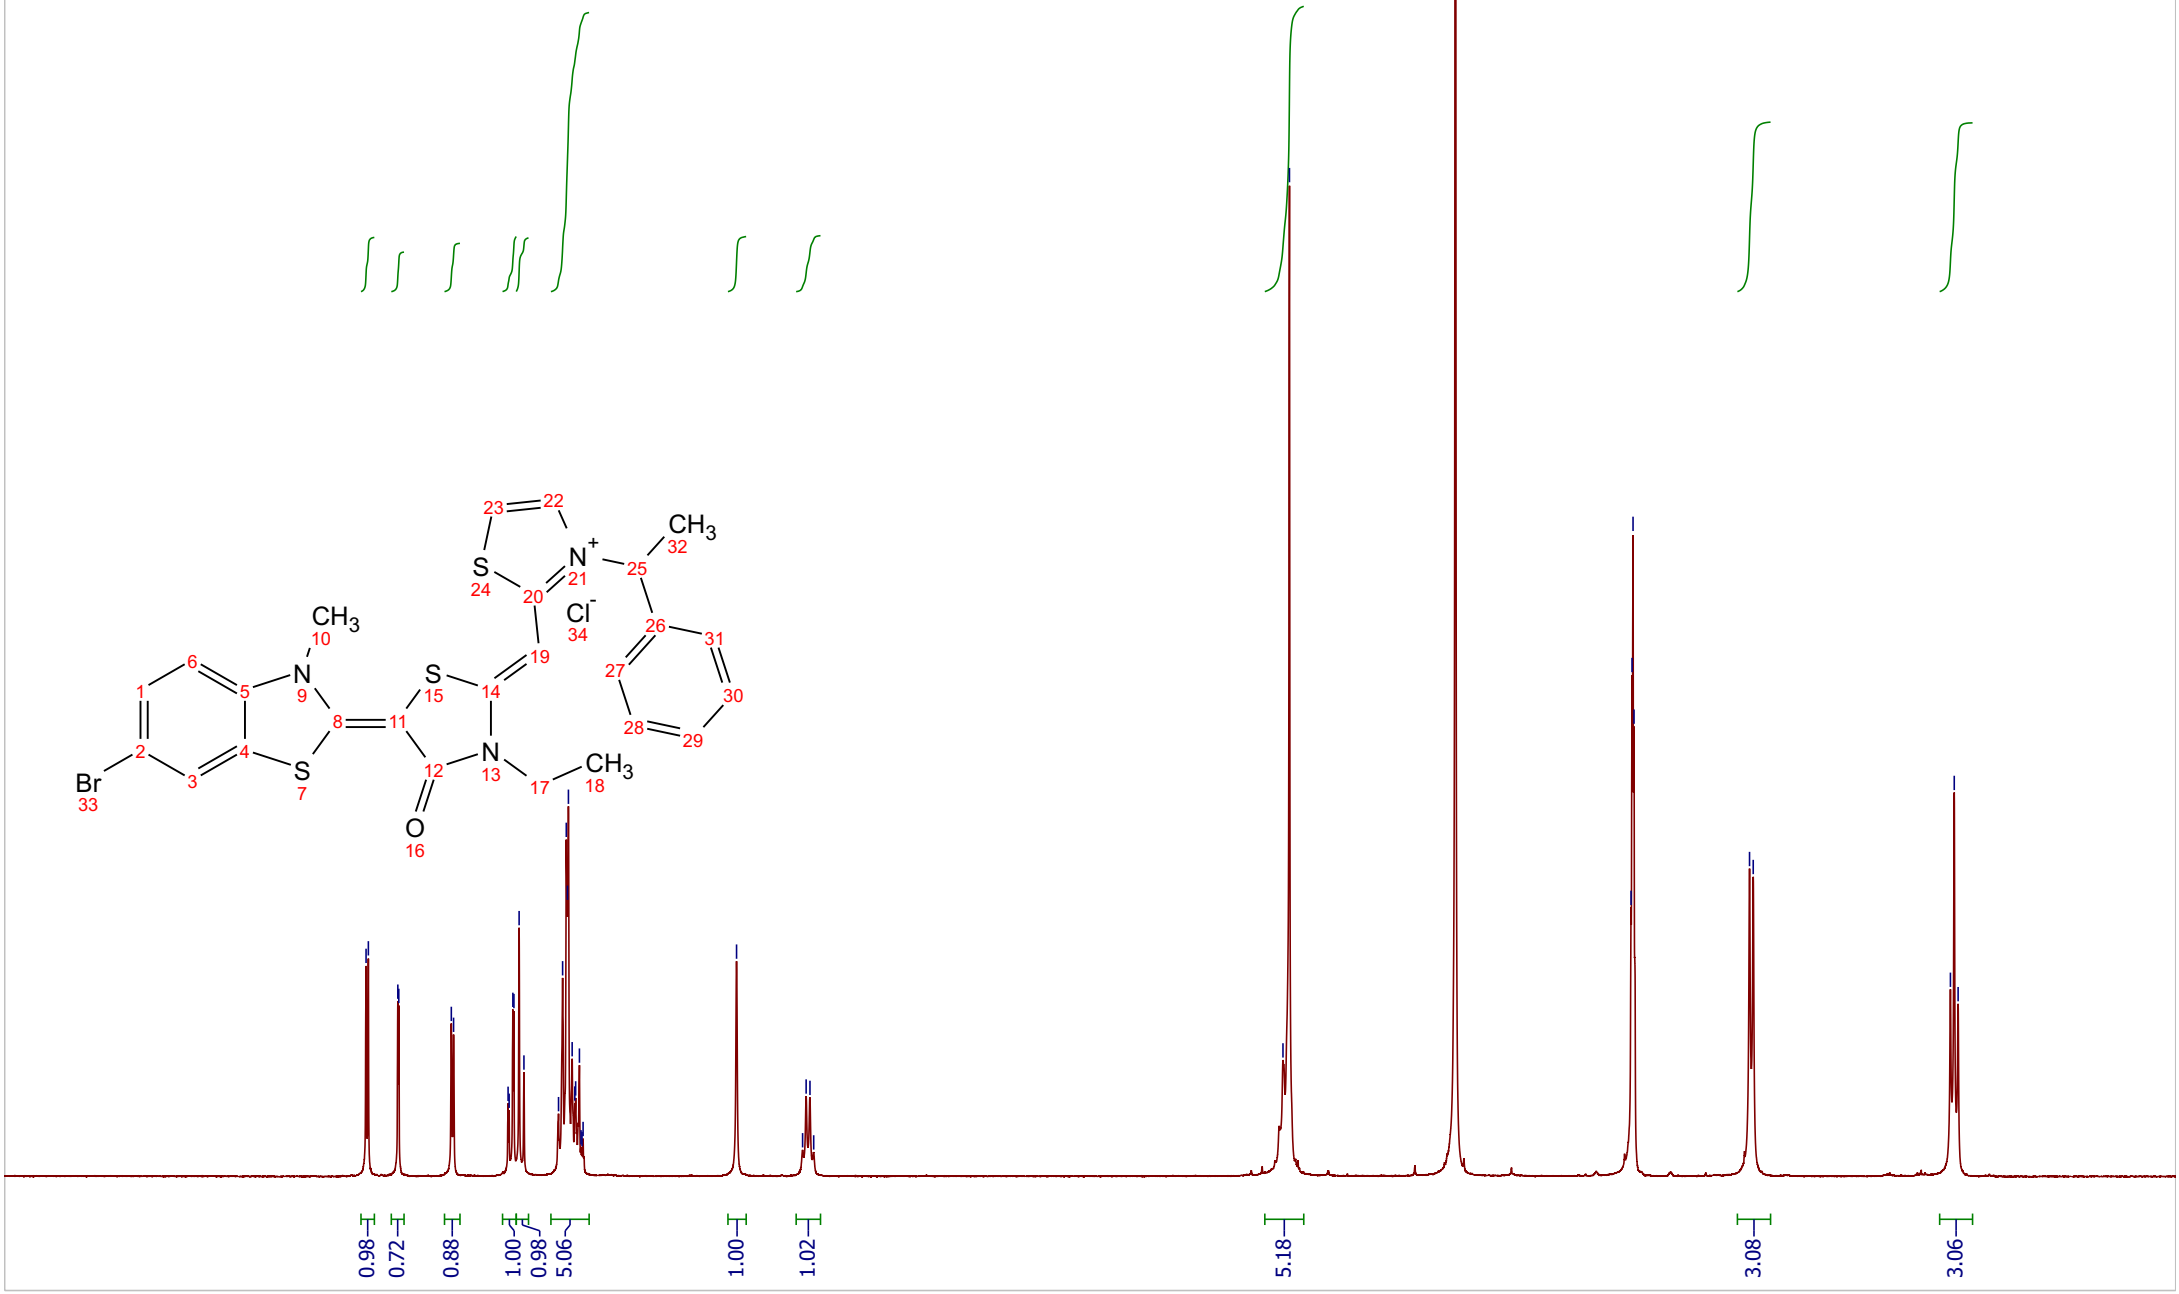

1.0 9.5 9.0 8.5 8.0 7.5 7.0 6.5 6.0 5.5 5.0 4.5 4.0 3.5 3.0 2.5 2.0 1.5 1.0 0.5 0.0  
f1 (ppm)

03102014\_2  
STANDARD 1H OBSERVE  
Compound 23

8.31  
8.30  
7.90  
7.89  
7.73  
7.60  
7.58  
7.43  
7.43  
7.41  
7.41  
7.40  
7.38  
7.35  
6.61  
6.30  
6.28  
6.26  
6.25

4.13  
4.11  
4.09  
4.07

2.51  
2.50  
2.50  
2.49  
2.38  
1.96  
1.94

1.04  
1.02  
1.00

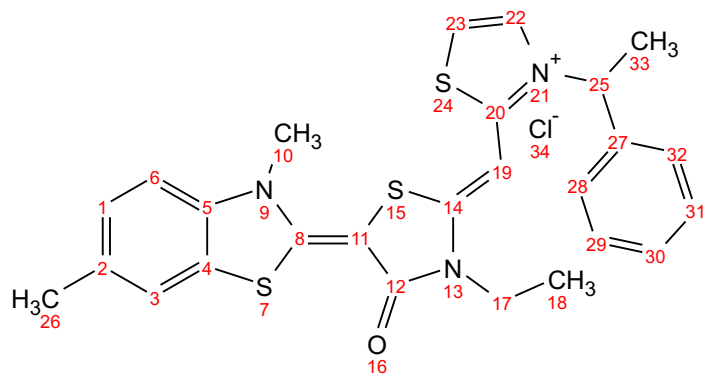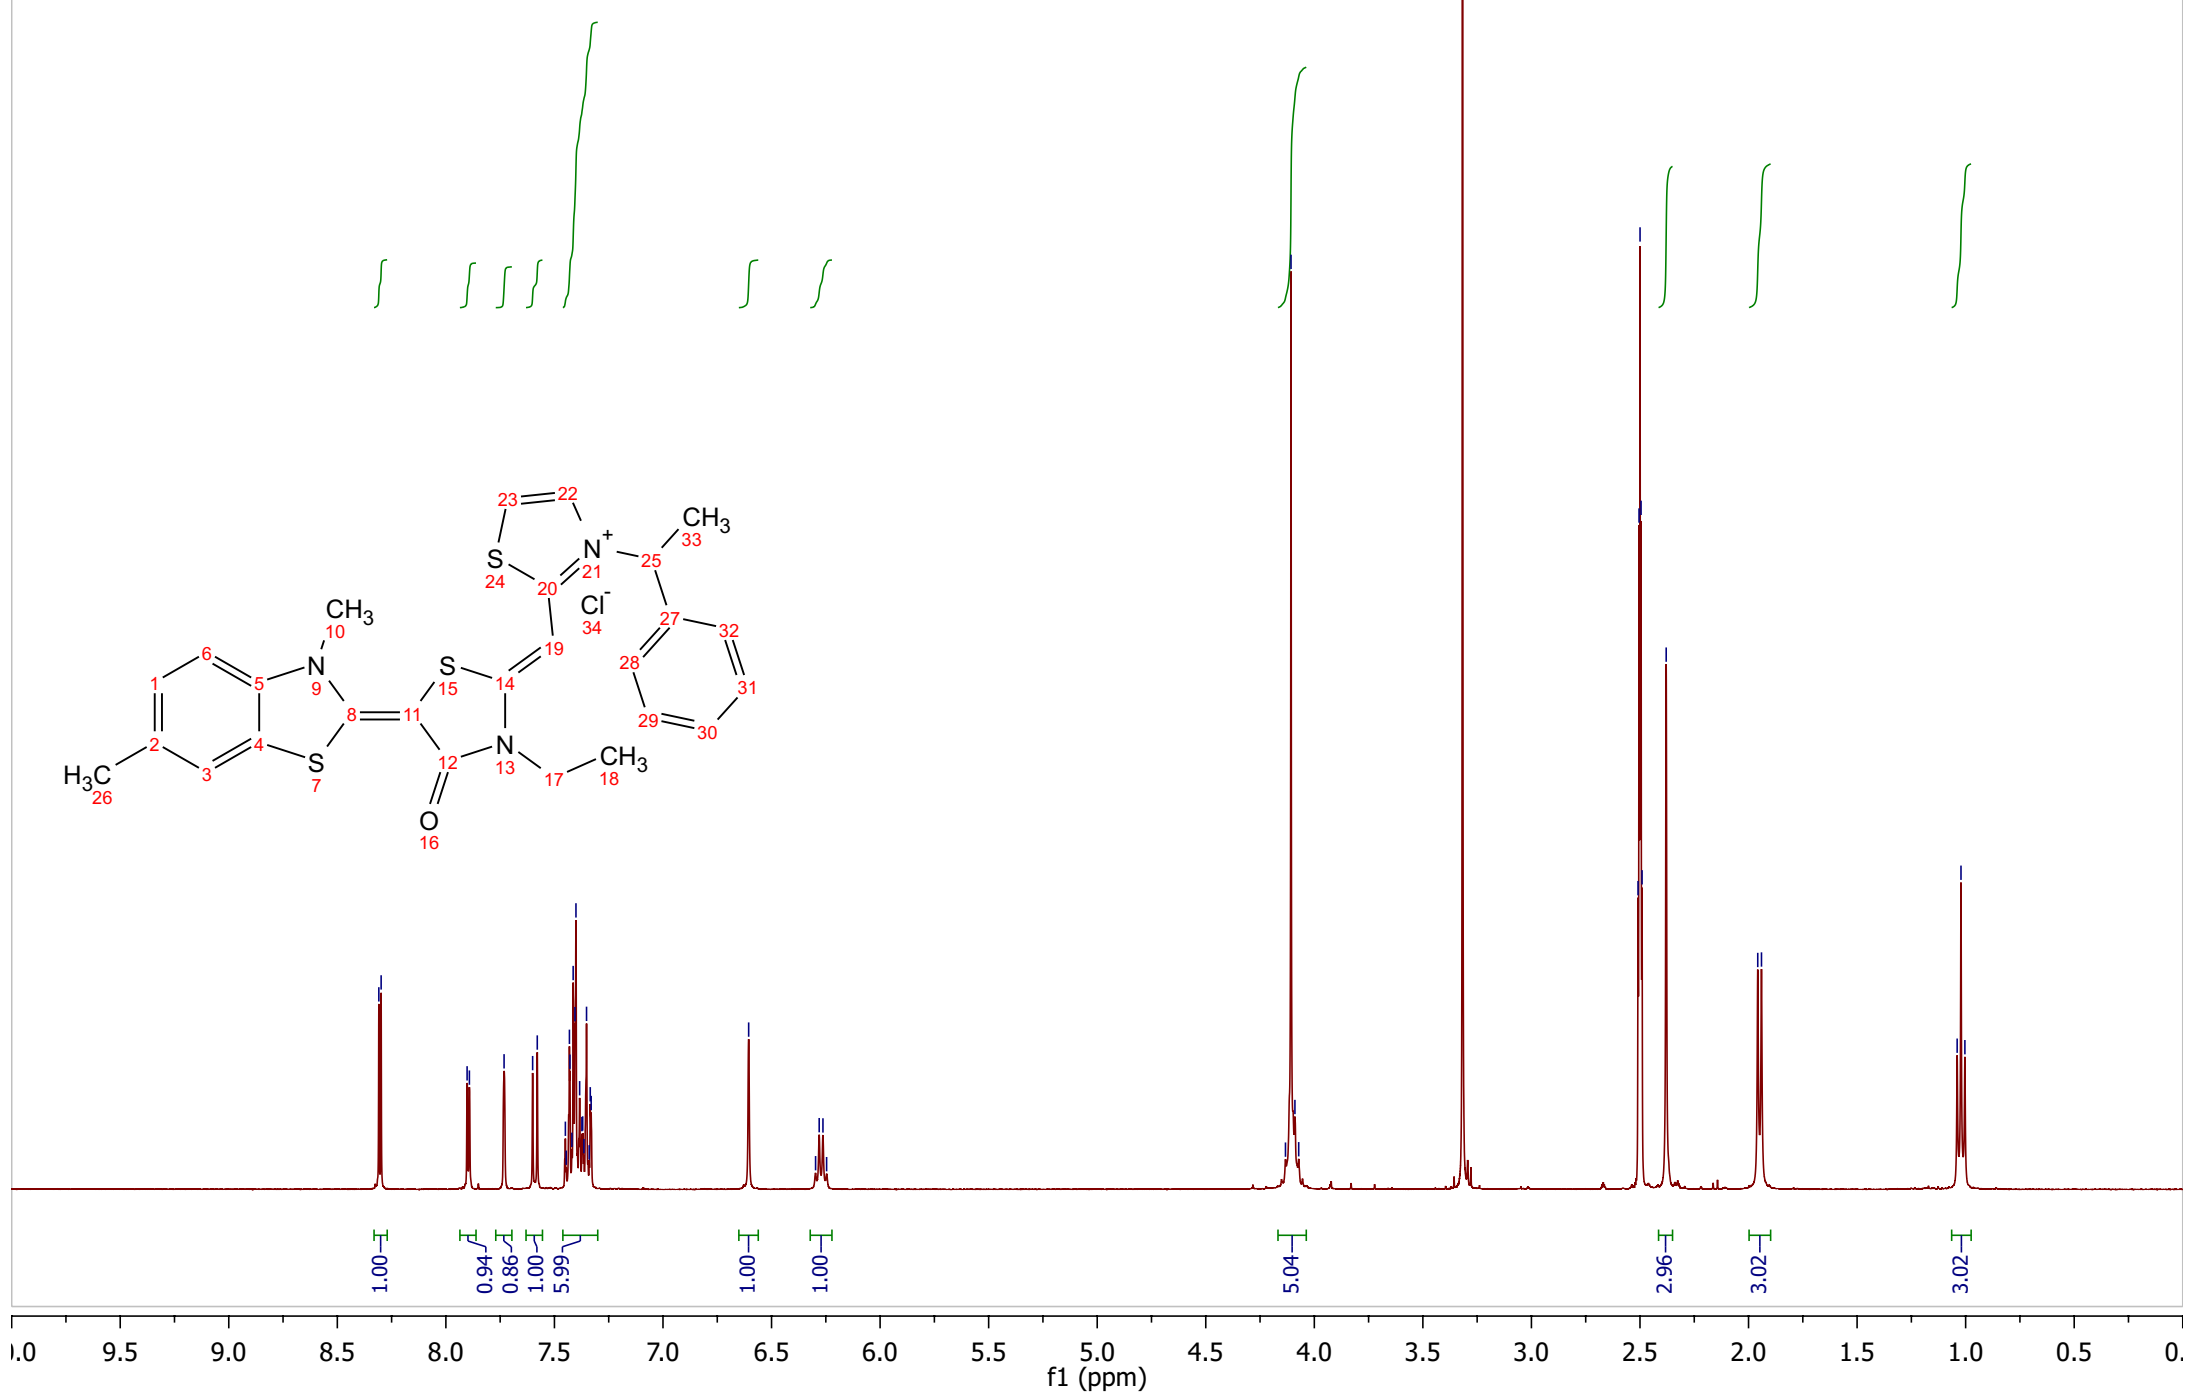

Compound 24

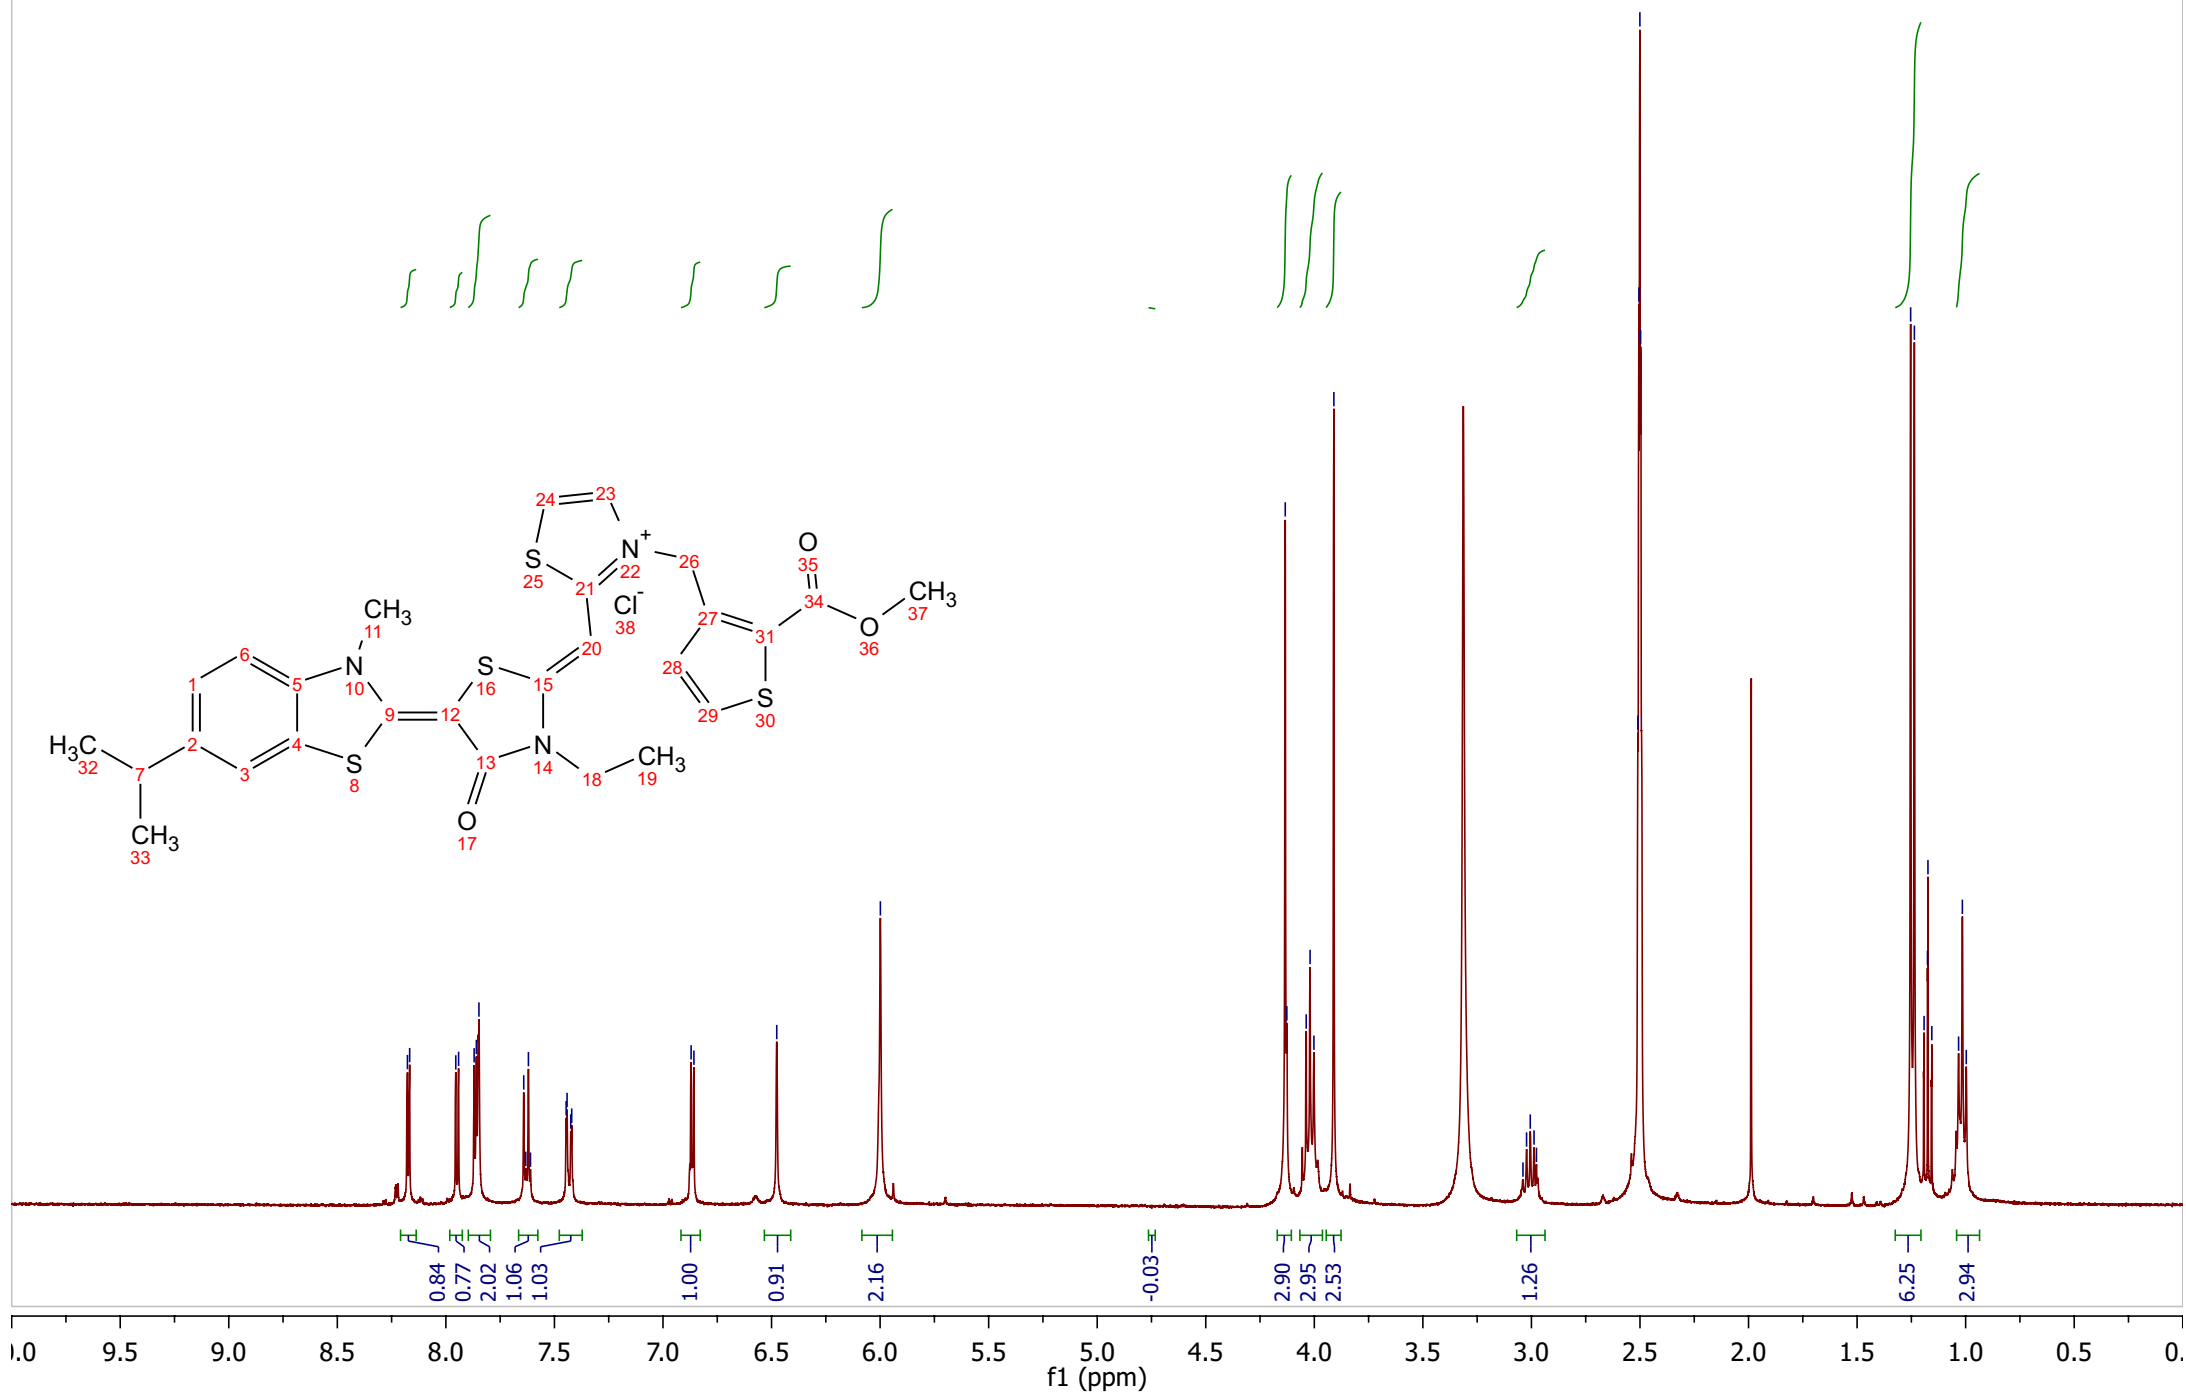

03052014\_5  
STANDARD 1H OBSERVE  
Compound 25

8.17 8.16 7.95 7.94 7.87 7.85 7.80 7.64 7.62 7.41 7.39 6.87 6.85 6.48 6.00 4.14 4.02 4.00 3.91 3.83 2.73 2.71 2.69 2.67 2.54 2.51 2.50 2.50 2.49 2.49 2.33 1.24 1.22 1.20 1.03 1.01 1.00

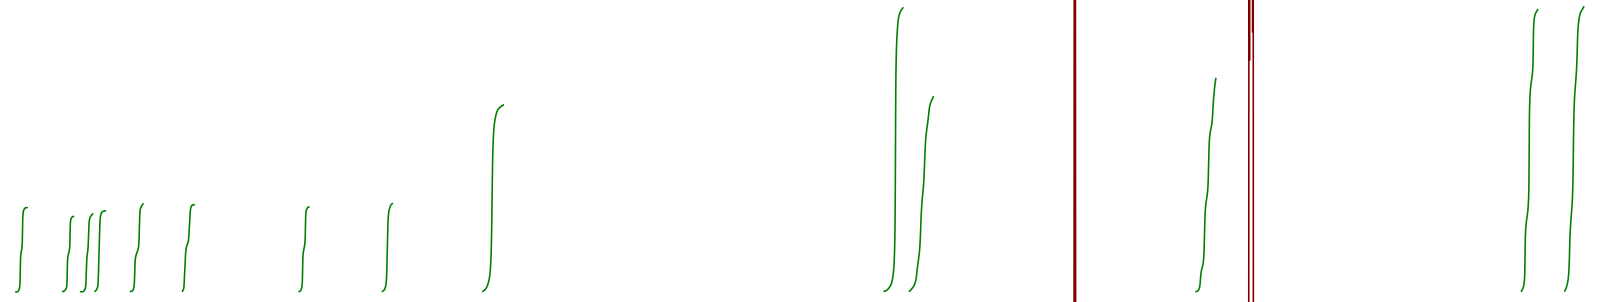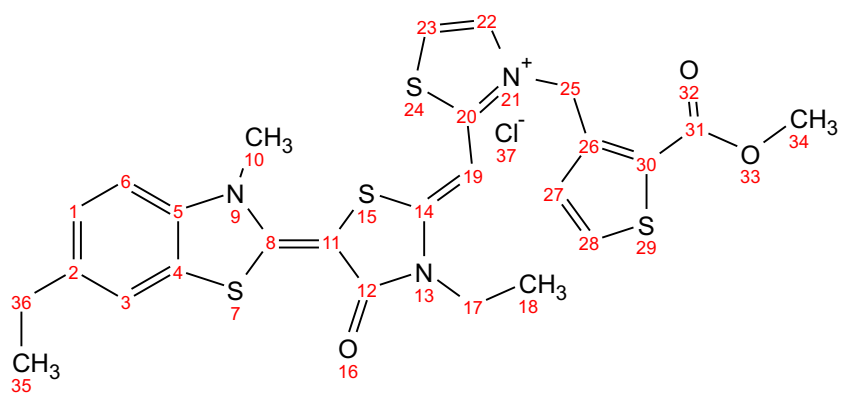

0.96 0.85 0.89 0.92 1.00 0.99 0.96 1.00 2.12 3.23 2.22 2.43 3.21 3.24

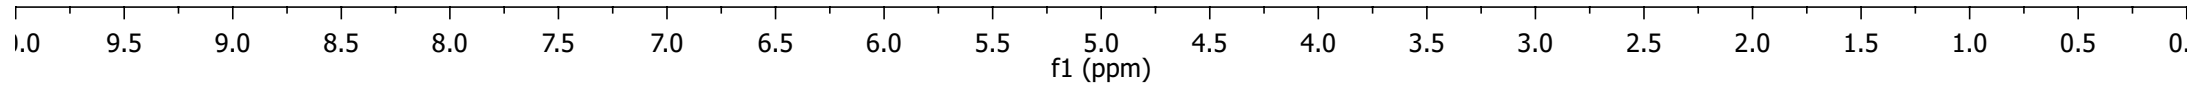

12122013\_1  
STANDARD 1H OBSERVE  
Compound 26

8.29  
8.28

7.94  
7.93

7.68  
7.63

7.62  
7.61

7.61  
7.10

6.68

5.78

4.17  
4.16

4.14  
4.12  
4.09

2.50

1.10  
1.08  
1.06

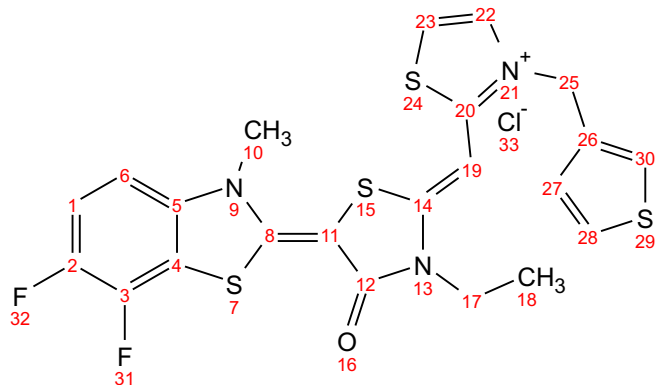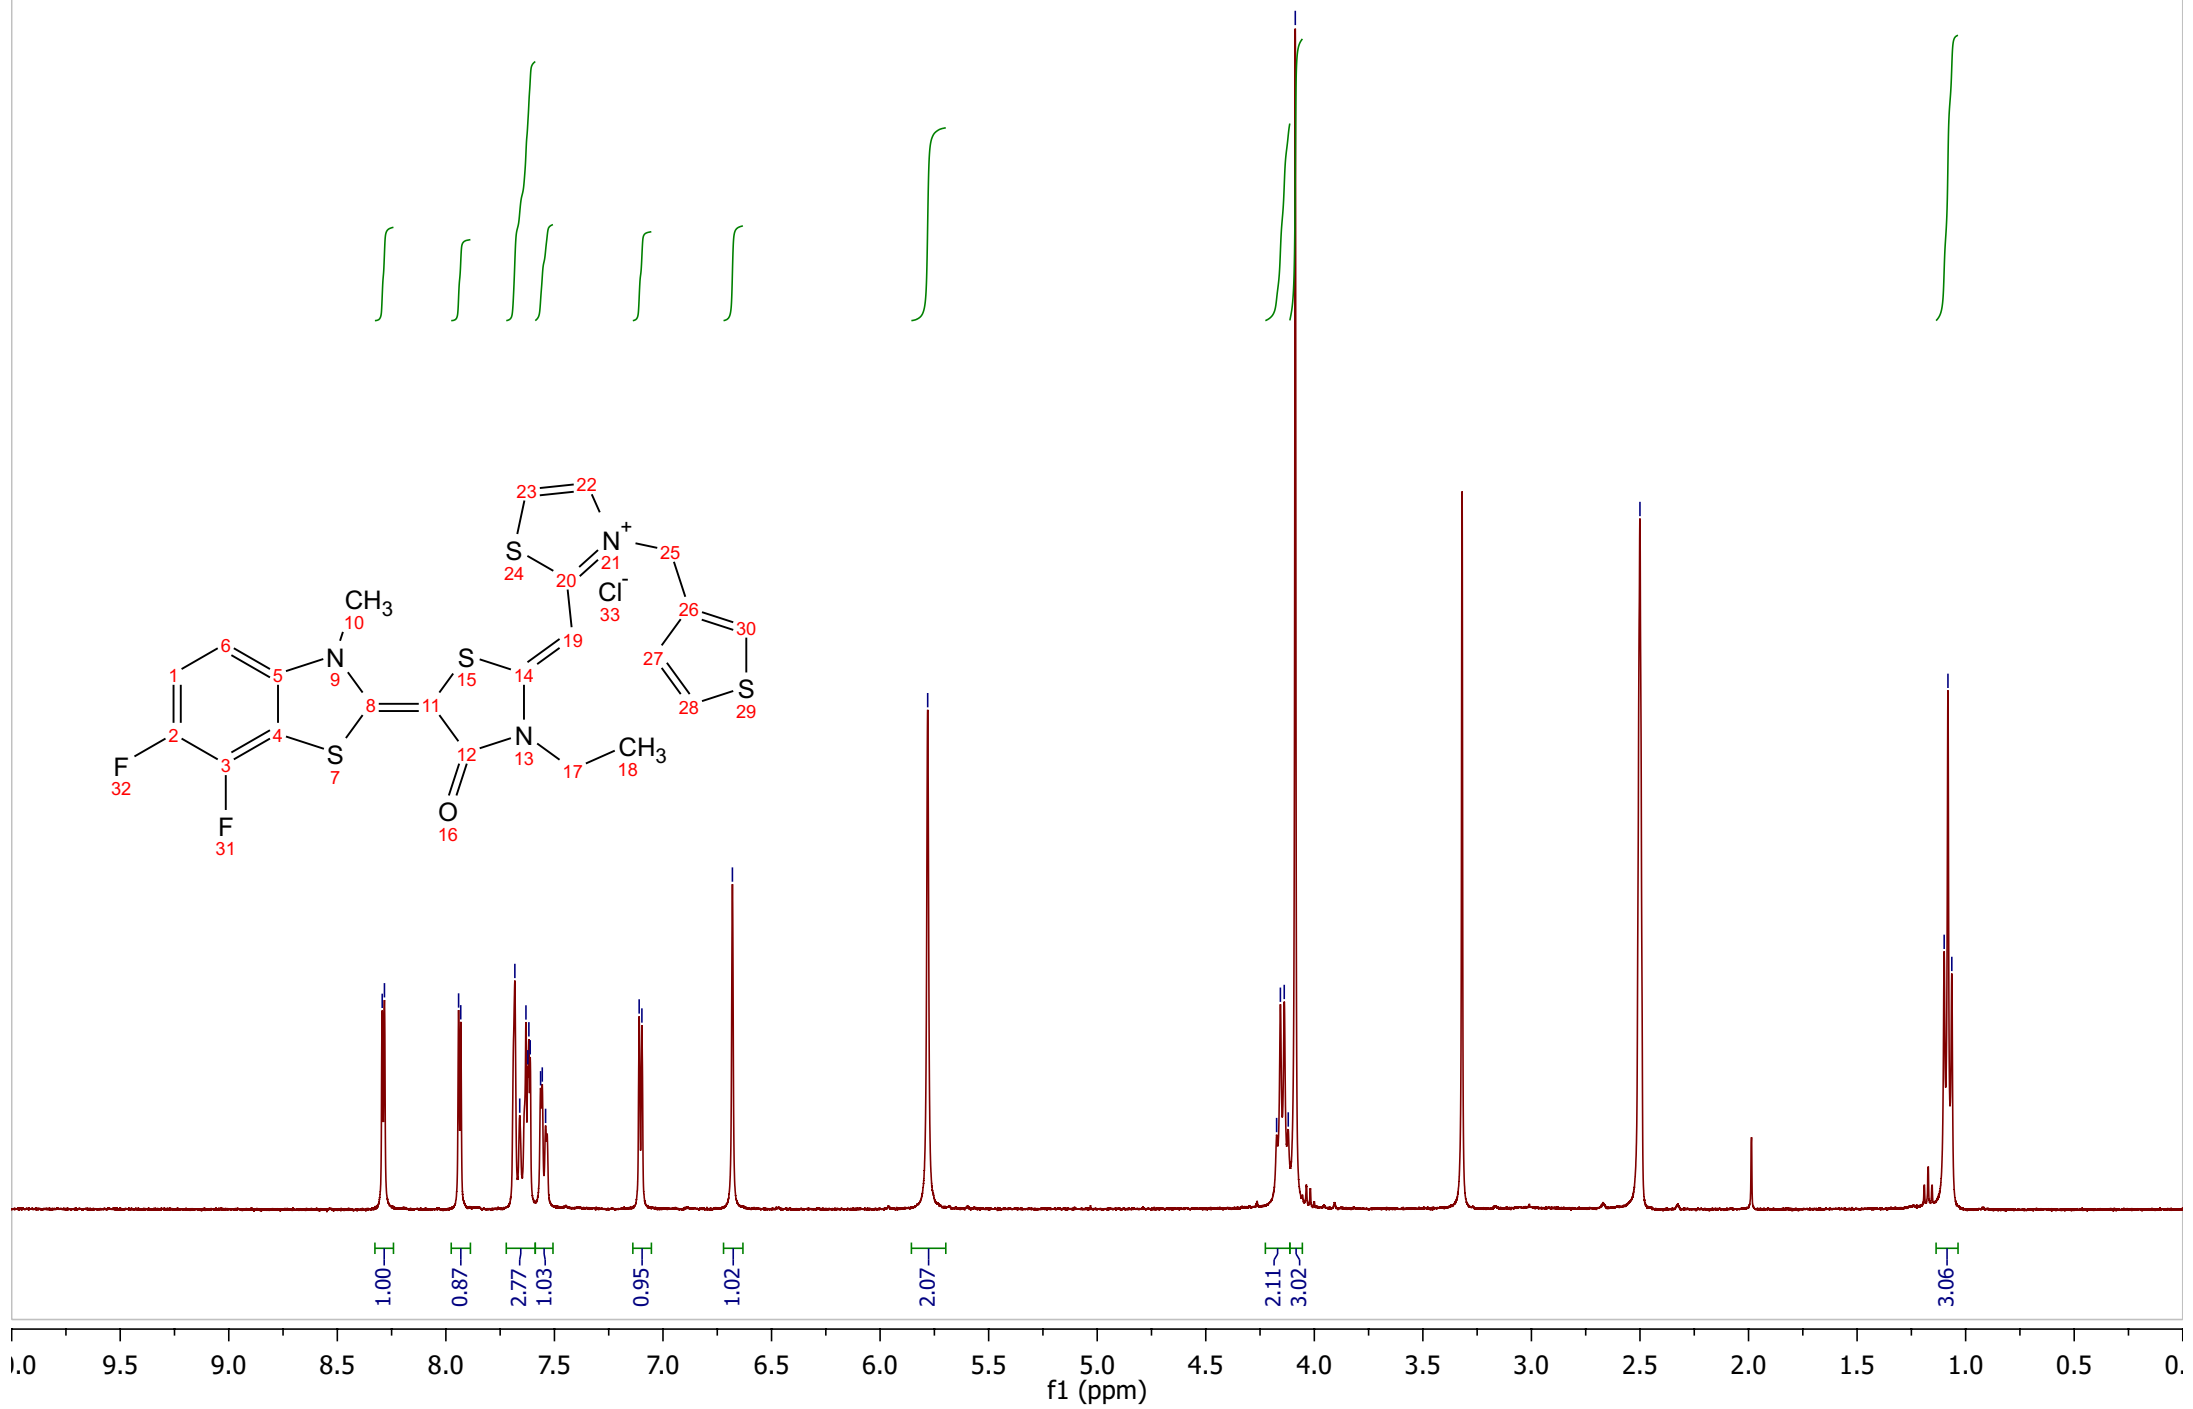

12132013\_2  
STANDARD 1H OBSERVE  
Compound 27

8.16  
8.15  
7.94  
7.93  
7.72  
7.70  
7.68  
7.66  
7.64  
7.59  
7.58  
7.57  
7.56  
6.94  
6.93  
6.45

4.11  
4.08  
4.06  
4.05

2.50  
2.50  
2.50

1.13  
1.11  
1.09

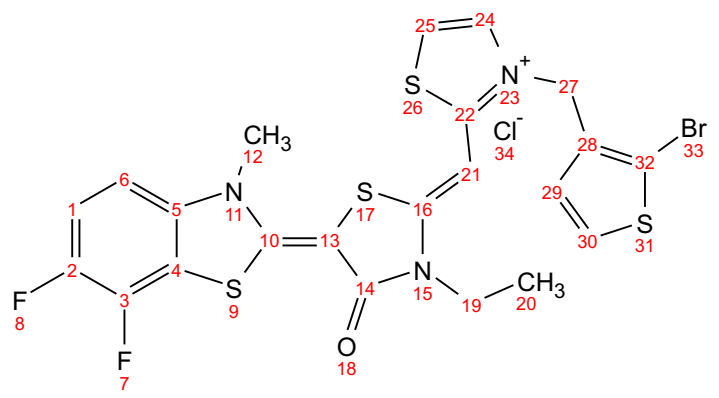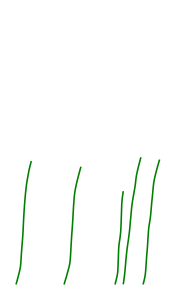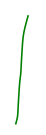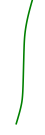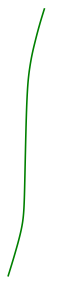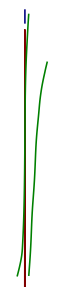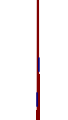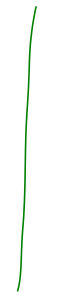

1.00

0.95

0.76

1.03

1.01

0.89

1.02

2.17

2.13

1.74

2.31



12062013\_6  
STANDARD 1H OBSERVE  
Compound 28

8.22  
8.21  
7.92  
7.91  
7.69  
7.66  
7.64  
7.58  
7.56  
7.55

6.68

6.35

5.88

4.13  
4.11

3.32

2.51  
2.50  
2.50  
2.50  
2.49  
2.40  
2.40

1.16  
1.14  
1.12

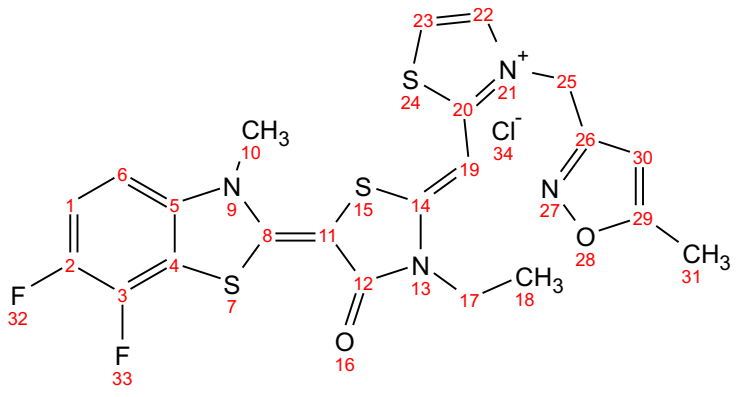

1.00

0.85

0.98

1.00

1.02

0.85

2.02

5.10

2.96

3.11

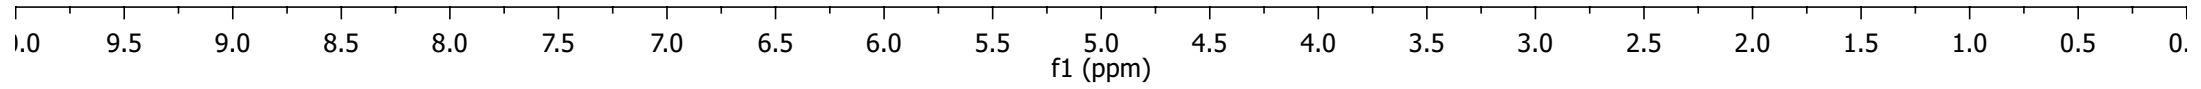



02252014\_5  
STANDARD 1H OBSERVE  
JG-273

8.48  
8.47  
7.84  
7.83  
7.61  
7.60  
7.59  
7.58  
7.57  
7.56  
7.18  
6.92  
6.90  
6.89

6.08

3.81  
3.80  
3.67  
3.65  
3.64  
3.33  
3.32  
3.10  
3.08  
3.06

2.50

1.16  
1.14  
1.12

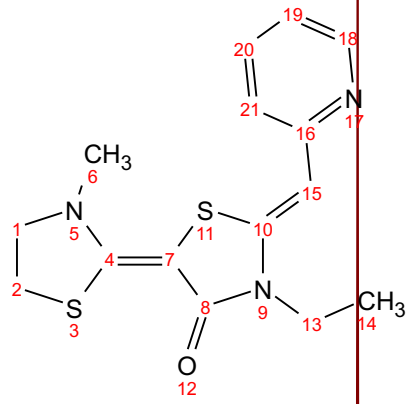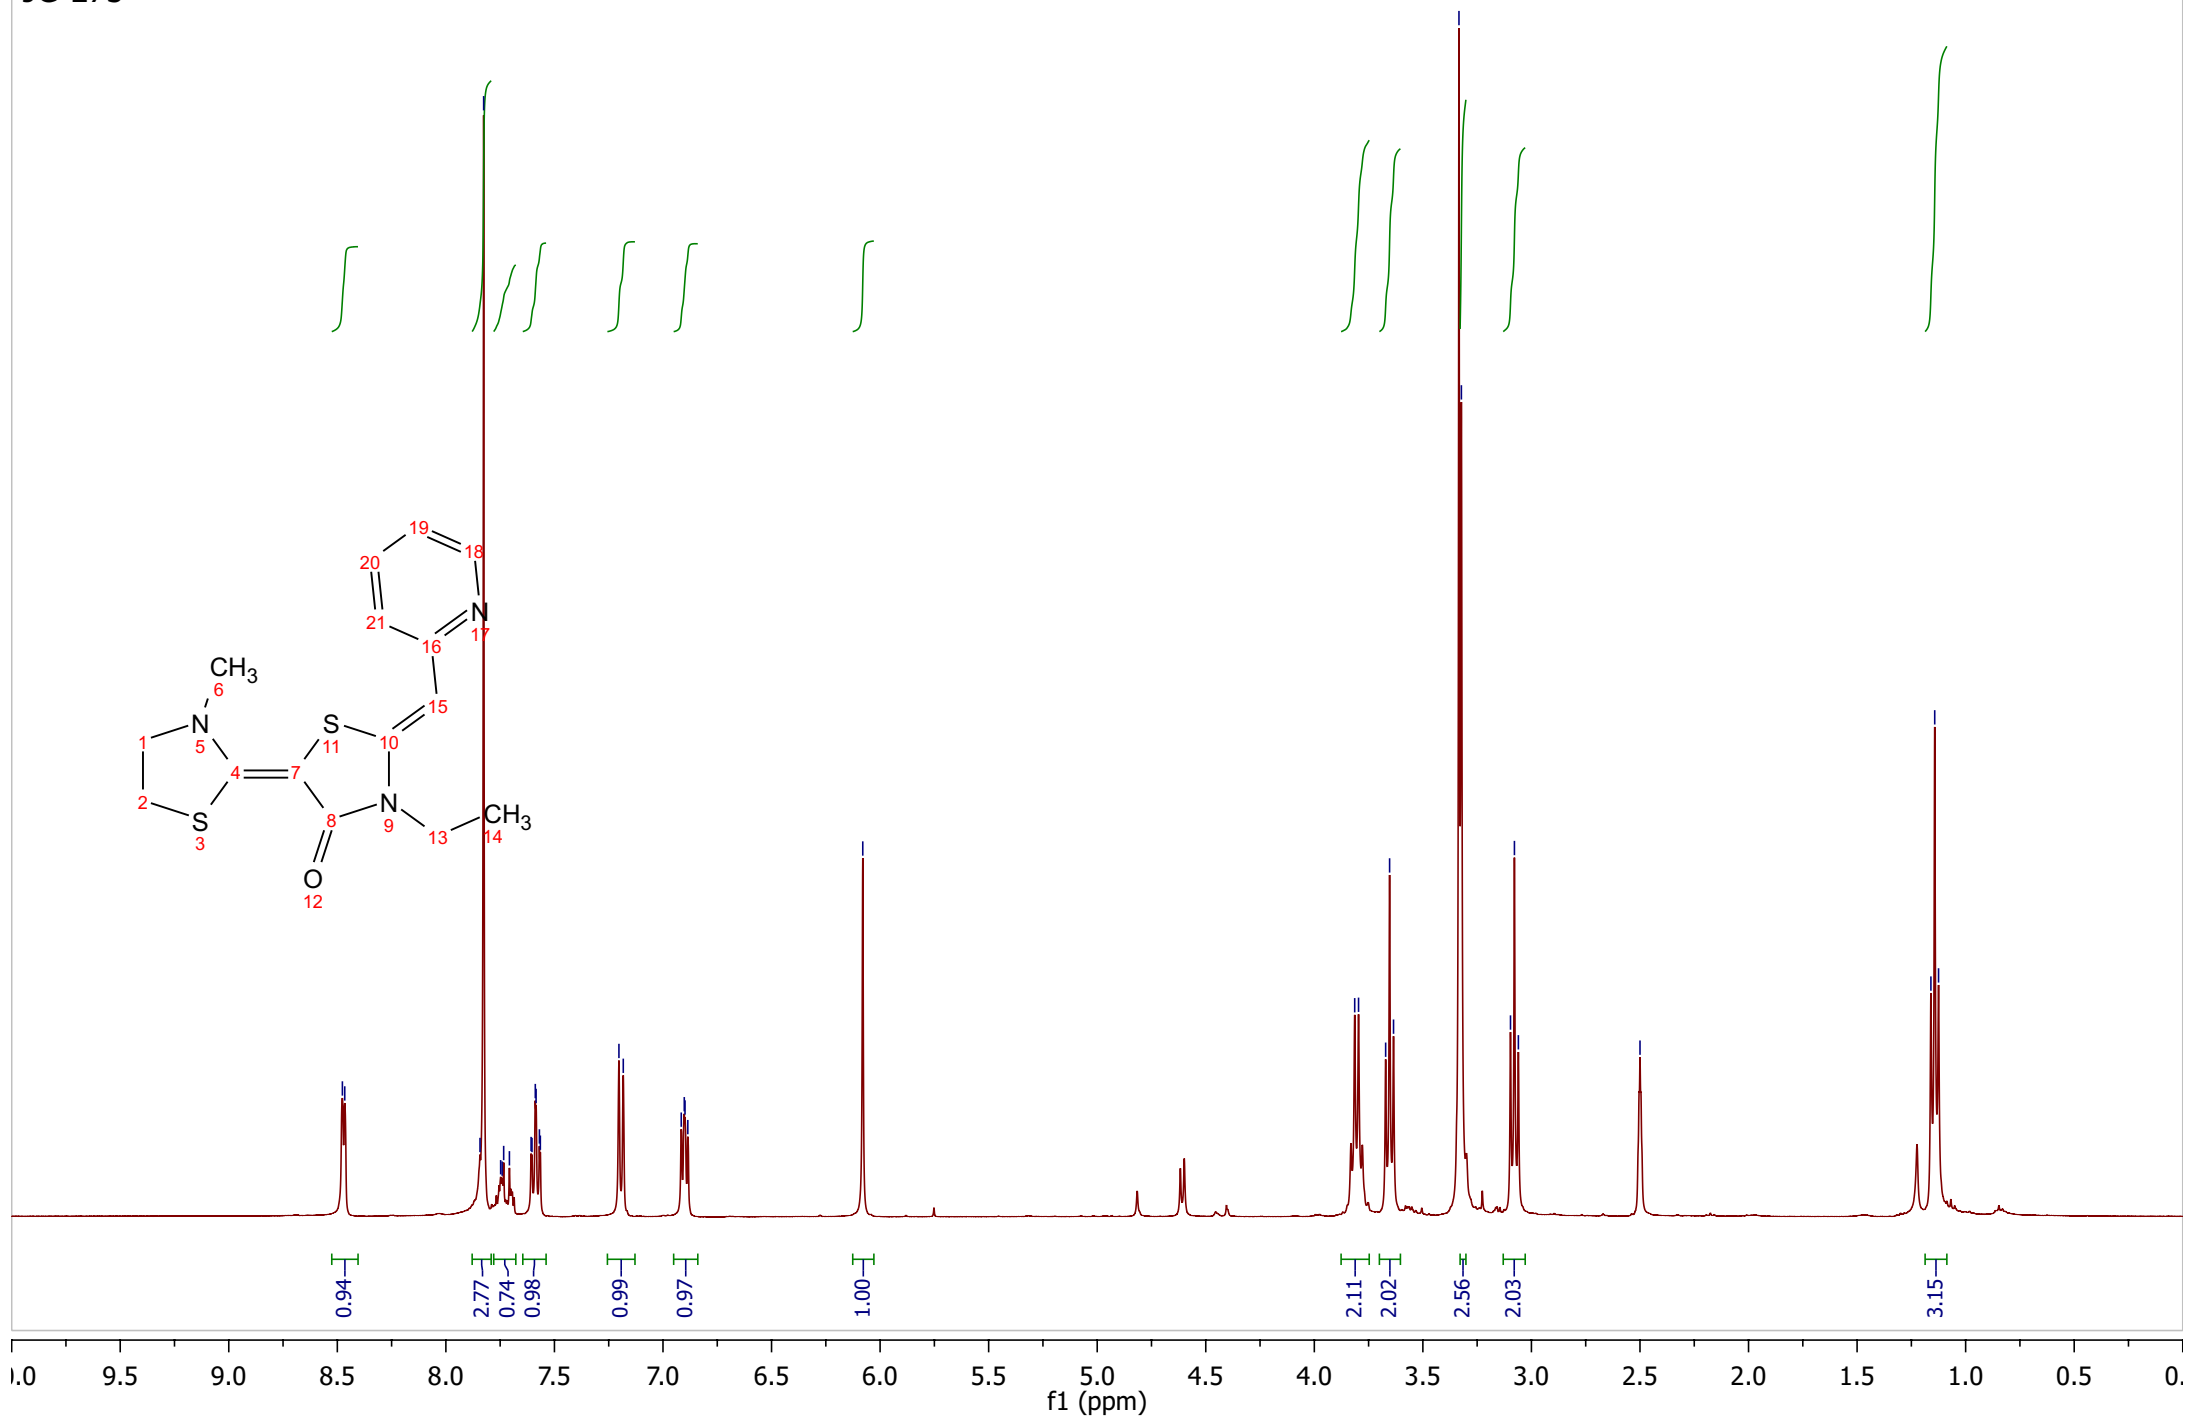

Supplement: SC-011-C9SC04284A-s001.pdf [file SC-011-C9SC04284A-s001.pdf]
